# Supplementary material for: Protein-Gene Orthology in Baculoviridae: An Exhaustive Analysis to Redefine the Ancestrally Common Coding Sequences
Source: MDPI journal article supplement (doi:10.3390/v15051091), 2023-04-29
Supplement: s1 [file s1]

# SUPPLEMENTARY MATERIAL (Tables)

This section contains supplementary **Tables S1, S2, S3, S4, S5, S6 and S7.**

**Table S1.** Baculoviruses and other invertebrate viruses used.

| <i>Alphabaculovirus Group I</i>                                          |                                    |             |              |
|--------------------------------------------------------------------------|------------------------------------|-------------|--------------|
| Denomination                                                             | Strain/Isolate/Genotype            | Acronym     | GB Accession |
| Antheraea pernyi MNPV                                                    | Isolate L2                         | AnpeMNPV-L2 | EF207986     |
| Antheraea pernyi NPV                                                     | Isolate Z                          | AnpeNPV-Z   | NC_008035.3  |
| Antheraea pernyi NPV                                                     | Strain Liaoning                    | AnpeNPV-Li  | LC194889     |
| Antheraea pernyi NPV                                                     | Liaoning                           | Anpe-CN     | LC375540     |
| Antheraea proylei NPV                                                    | Strain Manipur                     | AnprNPV-Ma  | LC375539     |
| Antheraea proylei NPV                                                    | Strain Manipur/ isolate AnprNPV-TS | AnprNPV-TS  | KY979487     |
| Antheraea proylei NPV                                                    | strain TkhulenIBD                  | AnprNPV-TK  | MH797002     |
| Antheraea yamamai NPV                                                    | Strain Nagano                      | AnyaNPV-Na  | LC375537     |
| Anticarsia gemmatalis MNPV                                               | Isolate 2D                         | AgMNPV      | NC_008520.2  |
| Anticarsia gemmatalis MNPV                                               | Isolate Ag-01                      | AgMNPV-01   | MG746625     |
| Anticarsia gemmatalis MNPV                                               | Isolate Ag-16                      | AgMNPV-16   | MG746626     |
| Anticarsia gemmatalis MNPV                                               | Isolate 26                         | AgMNPV-26   | KR815455     |
| Anticarsia gemmatalis MNPV                                               | Isolate 27                         | AgMNPV-27   | KR815456     |
| Anticarsia gemmatalis MNPV                                               | Isolate 28                         | AgMNPV-28   | KR815457     |
| Anticarsia gemmatalis MNPV                                               | Isolate 29                         | AgMNPV-29   | KR815458     |
| Anticarsia gemmatalis MNPV                                               | Isolate 30                         | AgMNPV-30   | KR815459     |
| Anticarsia gemmatalis MNPV                                               | Isolate 31                         | AgMNPV-31   | KR815460     |
| Anticarsia gemmatalis MNPV                                               | Isolate 32                         | AgMNPV-32   | KR815461     |
| Anticarsia gemmatalis MNPV                                               | Isolate 33                         | AgMNPV-33   | KR815462     |
| Anticarsia gemmatalis MNPV                                               | Isolate 34                         | AgMNPV-34   | KR815463     |
| Anticarsia gemmatalis MNPV                                               | Isolate 35                         | AgMNPV-35   | KR815464     |
| Anticarsia gemmatalis MNPV                                               | Isolate 36                         | AgMNPV-36   | KR815465     |
| Anticarsia gemmatalis MNPV                                               | Isolate 37                         | AgMNPV-37   | NC_031761    |
| Anticarsia gemmatalis MNPV                                               | Isolate 38                         | AgMNPV-38   | KR815467     |
| Anticarsia gemmatalis MNPV                                               | Isolate 39                         | AgMNPV-39   | KR815468     |
| Anticarsia gemmatalis MNPV                                               | Isolate 40                         | AgMNPV-40   | KR815469     |
| Anticarsia gemmatalis MNPV                                               | Isolate 42                         | AgMNPV-42   | KR815470     |
| Anticarsia gemmatalis MNPV                                               | Isolate 43                         | AgMNPV-43   | KR815471     |
| Autographa californica MNPV                                              | Clone C6                           | AcMNPV      | NC_001623    |
| Autographa californica MNPV                                              | Strain E2                          | AcMNPV-E2   | KM667940     |
| Autographa californica MNPV                                              | Isolate WP10                       | AcMNPV-WP10 | KM609482     |
| Bombyx mandarina NPV                                                     | Isolate S1                         | BomaNPV-S1  | NC_012672    |
| Bombyx mandarina NPV                                                     | Isolate S2                         | BomaNPV-S2  | JQ071499     |
| Bombyx mori NPV                                                          | Isolate T3                         | BmNPV       | NC_001962    |
| Bombyx mori NPV                                                          | strain Cubic                       | BmNPV-Cub   | JQ991009     |
| Bombyx mori NPV                                                          | strain Guangxi                     | BmNPV-Gua   | JQ991011     |
| Bombyx mori NPV                                                          | strain India                       | BmNPV-Ind   | JQ991010     |
| Bombyx mori NPV                                                          | strain Zhejiang                    | BmNPV-Zhe   | JQ991008     |
| <i>The table with Group I alphabaculoviruses continues the next page</i> |                                    |             |              |
| Denomination                                                             | Strain/Isolate/Genotype            | Acronym     | GB Accession |
| Bombyx mori NPV                                                          | isolate C1                         | BmNPV-C1    | KF306215     |
| Bombyx mori NPV                                                          | isolate C2                         | BmNPV-C2    | KF306216     |

|                                   |                          |              |             |
|-----------------------------------|--------------------------|--------------|-------------|
| Bombyx mori NPV                   | isolate C6               | BmNPV-C6     | KF306217    |
| Bombyx mori NPV                   | strain Brazilian         | BmNPV-Bra    | KJ186100    |
| Bombyx mori NPV                   | strain La                | BmNPV-La     | LC500465    |
| Bombyx mori NPV                   | isolate Baoshan          | BmNPV-Bao    | MT501299    |
| Catopsilia pomona                 | isolate 416              | CapoNPV      | NC_030240   |
| Choristoneura fumiferana MNPV     | --                       | CfMNPV       | NC_004778.3 |
| Choristoneura fumiferana Def MNPV | --                       | CfDEFMNPV    | NC_005137.2 |
| Choristoneura murinana NPV        | Strain Darmstadt         | ChmuNPV      | NC_023177   |
| Choristoneura occidentalis NPV    | Isolate BC1              | ChocNPV      | NC_021925   |
| Choristoneura rosaceana NPV       | Isolate NB1              | ChroNPV      | NC_021924   |
| Choristoneura diversana NPV       | Isolate ChdiNPV-Hokkaido | ChdiNPV      | LC516821    |
| Condylorrhiza vestigialis MNPV    | --                       | CoveMNPV     | NC_026430   |
| Cyclophragma undans NPV           | Isolate Whiov            | CyunNPV-Wh   | NC_055467   |
| Dasychira pudibunda NPV           | Isolate ML1              | DapuNPV      | KP747440    |
| Dendrolimus kikuchii NPV          | strain YN                | DekiNPV      | JX193905    |
| Dione junio NPV                   | isolate Araguari-MG      | Araguari-MG  | MK558262    |
| Epiphyas postvittana NPV          | --                       | EppoNPV      | NC_003083   |
| Hyphantria cunea NPV              | --                       | HycuNPV      | NC_007767   |
| Hyphantria cunea NPV              | isolate BJ               | HycuNPV-BJ   | OL686894    |
| Hyphantria cunea NPV              | isolate HB               | HycuNPV-HB   | OL686893    |
| Lonomia obliqua MNPV              | isolate SP/2000          | LoobMNPV     | NC_043520   |
| Maruca vitrata NPV                | --                       | MaviNPV      | NC_008725   |
| Orgyia pseudotsugata MNPV         | --                       | OpMNPV       | NC_001875.2 |
| Orgyia pseudotsugata SNPV         | isolate MEM              | OpSNPV-MEM   | MZ127289    |
| Oxyplax ochracea NPV              | isolate 435              | OxocNPV-435  | NC_043529   |
| Philosamia cynthia ricini NPV     | --                       | PhcyNPV      | JX404026    |
| Plutella xylostella MNPV          | Isolate CL3              | PlxyMNPV     | NC_008349   |
| Rachiplusia nu MNPV               | isolate VPN54            | RanuMNPV     | MK419956    |
| Samia cynthia NPV                 | Isolate Nagano           | SacyNPV-Na   | LC375538    |
| Samia ricini NPV                  | Isolate Guangxi          | SariNPV-Gu   | LC375541    |
| Samia ricini NPV                  | Isolate Mondulkiri       | SariNPV-Mo   | LC375542    |
| Samia ricini NPV                  | Isolate Son La           | SariNPV-SL   | LC375543    |
| Spilosoma obliqua NPV             | Isolate IIPR             | SpobNPV-IIPR | KY550224    |
| Thysanoplusia orichalcea NPV      | Isolate P2               | ThorNPV-P2   | NC_019945   |

Group II alphabaculoviruses continue the next page.

| Alphabaculovirus Group II  |                          |                  |              |
|----------------------------|--------------------------|------------------|--------------|
| Denomination               | Strain/Isolate/Genotype  | Acronym          | GB Accession |
| Adoxophyes honmai NPV      | --                       | AdhoNPV          | NC_004690    |
| Adoxophyes orana NPV       | --                       | AdorNPV          | NC_011423    |
| Agrotis ipsilon MNPV       | --                       | AgipMNPV         | NC_011345    |
| Agrotis segetum NPV        | --                       | AgseNPV          | NC_007921    |
| Agrotis segetum NPV        | B isolate English        | AgseNPV-Beng     | NC_025960    |
| Apocheima cinerarium NPV   | --                       | ApciNPV          | NC_018504    |
| Buzura suppressaria NPV    | Isolate Hubei            | BusuNPV          | NC_023442    |
| Buzura suppressaria NPV    | Isolate Guangxi          | BusuNPV-G        | KM986882     |
| Buzura suppressaria NPV    | isolate BisuNPV-CNPSO-25 | BisuNPV-CNPSO-25 | MT561366     |
| Chrysodeixis chalcites NPV | --                       | ChchNPV          | NC_007151    |
| Chrysodeixis chalcites NPV | genotype ChchSNPV-TF1-C  | ChchNPV-TF1C     | JX560539     |
| Chrysodeixis chalcites NPV | genotype ChchSNPV-TF1-H  | ChchNPV- TF1H    | JX560542     |
| Chrysodeixis chalcites NPV | genotype ChchSNPV-TF1-B  | ChchSNPV-TF1B    | JX560540     |

|                               |                         |               |             |
|-------------------------------|-------------------------|---------------|-------------|
| Chrysodeixis chalcites NPV    | genotype ChchSNPV-TF1-G | ChchSNPV-TF1G | JX560541    |
| Chrysodeixis chalcites NPV    | genotype ChchSNPV-TF1-A | ChchSNPV-TF1A | JX535500    |
| Chrysodeixis includens NPV    | isolate ChinNPV-1       | ChinNPV-1     | MK746083    |
| Chrysodeixis includens NPV    | isolate ChinNPV-MG.A    | ChinNPV-MGA   | MN542939    |
| Chrysodeixis includens NPV    | isolate ChinNPV-MG.B    | ChinNPV-MGB   | MN542938    |
| Chrysodeixis includens NPV    | isolate ChinNPV-MT.A    | ChinNPV-MTA   | MN689112    |
| Chrysodeixis includens NPV    | isolate ChinNPV-MT.B    | ChinNPV-MTB   | MN689113    |
| Chrysodeixis includens NPV    | isolate ChinNPV-MT.C    | ChinNPV-MTC   | MN689114    |
| Chrysodeixis includens NPV    | isolate ChinNPV-MT.D    | ChinNPV-MTD   | MN689115    |
| Chrysodeixis includens NPV    | isolate ChinNPV-MT.E    | ChinNPV-MTE   | MN689116    |
| Clanis bilineata NPV          | Isolate DZ1             | ClbiNPV       | NC_008293   |
| Cryptophlebia peltastica      | Isolate SA              | CrpeNPV       | NC_055500   |
| Ectropis obliqua NPV          | Strain A1               | EcobNPV       | NC_008586   |
| Ectropis obliqua NPV          | Strain Unioasis 1       | EcobNPV-U1    | KC960018    |
| Ectropis obliqua NPV          | strain QF4              | EcoNPV-QF4    | MZ394738    |
| Erannis ankeraria             | isolate wlcb            | EranNPV       | OK091173    |
| Euproctis digramma NPV        | strain 424              | ArdiNPV       | MN233792    |
| Euproctis pseudoconspersa NPV | --                      | EupsNPV       | NC_012639   |
| Gynaephora ruoergensis NPV    | --                      | GyruNPV       | MW173388    |
| Helicoverpa armigera MNPV     | --                      | HaMNPV        | NC_011615   |
| Helicoverpa armigera NPV      | Isolate Australia       | HaNPV-Aus     | JN584482    |
| Helicoverpa armigera NPV      | Strain C1               | HaNPV-C1      | NC_003094.2 |
| Helicoverpa armigera NPV      | Strain G4               | HaNPV-G4      | NC_002654.2 |
| Helicoverpa armigera SNP      | Strain NNg1             | HaSNPV        | NC_011354   |
| Helicoverpa armigera SNP      | isolate H25EA1          | HaSNPV-H25EA1 | KJ922128    |
| Helicoverpa armigera SNP      | Strain AC53             | HaSNPV-AC53   | NC_024688   |
| Helicoverpa armigera NPV      | Strain SP1A             | HaNPV-SP1A    | KJ701032    |
| Helicoverpa armigera NPV      | Strain SP1B             | HaNPV-SP1B    | KJ701033    |
| Helicoverpa armigera NPV      | Strain L1               | HaNPV-L1      | KT013224    |
| Helicoverpa armigera NPV      | Strain LB1              | HaNPV-LB1     | KJ701029    |
| Helicoverpa armigera NPV      | Strain LB3              | HaNPV-LB3     | KJ701030    |
| Helicoverpa armigera NPV      | Strain LB6              | HaNPV-LB6     | KJ701031    |

*The table with Group II alphabaculoviruses continues the next page*

| Denomination             | Strain/Isolate/Genotype | Acronym           | GB Accession |
|--------------------------|-------------------------|-------------------|--------------|
| Helicoverpa armigera NPV | Strain AC53T4.1         | HaSNPV-T4-1       | KU738902     |
| Helicoverpa armigera NPV | Strain AC53T4.2         | HaSNPV-T4-2       | KU738903     |
| Helicoverpa armigera NPV | Strain AC53C1           | HaSNPV-C1         | KU738896     |
| Helicoverpa armigera NPV | Strain AC53C3           | HaSNPV-C3         | KU738897     |
| Helicoverpa armigera NPV | Strain AC53C5           | HaSNPV-C5         | KU738898     |
| Helicoverpa armigera NPV | Strain AC53C6           | HaSNPV-C6         | KU738899     |
| Helicoverpa armigera NPV | Strain AC53C9           | HaSNPV-C9         | KU738900     |
| Helicoverpa armigera NPV | isolate HearNPV-TR      | HearNPV-TR        | MK507817     |
| Helicoverpa armigera NPV | strain WV104            |                   | MT810812     |
| Helicoverpa assulta NPV  | isolate HasNPV-DJ0031   | HasNPV-DJ0031     | MG569706     |
| Helicoverpa SNP          | Strain AC53T2           | HaSNPV-T2         | KU738901     |
| Helicoverpa SNP          | Strain AC53T5           | HaSNPV-T5         | KU738904     |
| Helicoverpa zea NPV      | --                      | HezeNPV           | NC_003349    |
| Helicoverpa zea SNP      | Strain HS-18            | HezeSNPV-HS18     | KJ004000     |
| Helicoverpa zea SNP      | isolate Br/South        | HezeSNPV-Br/South | KM596835     |
| Hemileuca sp NPV         | --                      | HespNPV           | NC_021923    |
| Hyposidra talaca NPV     | --                      | HytaNPV           | NC_055453.1  |
| Lambdina fiscellaria NPV | isolate GR15            | LafiNPV-GR15      | NC_026922    |

|                          |                    |                 |            |
|--------------------------|--------------------|-----------------|------------|
| Leucania separata NPV    | Strain AH1         | LeseNPV         | NC_008348  |
| Lymantria dispar MNPV    | --                 | LdMNPV          | NC_001973  |
| Lymantria dispar MNPV    | Isolate LdMNPV-27  | LdMNPV-27       | KP027546.2 |
| Lymantria dispar MNPV    | Strain 3029        | LdMNPV-3029     | KM386655   |
| Lymantria dispar MNPV    | isolate 2161       | LdMNPV-2161     | KF695050.2 |
| Lymantria dispar MNPV    | isolate BNP        | LdMNPV-BNP      | KU377538   |
| Lymantria dispar MNPV    | isolate RR01       | LdMNPV-RR01     | KX618634   |
| Lymantria dispar MNPV    | isolate Aba624     | LdMNPV-Aba624   | KT626572   |
| Lymantria dispar MNPV    | strain 3041        | LdMNPV-3041     | KT626571   |
| Lymantria dispar MNPV    | strain 3054        | LdMNPV-3054     | KT626570   |
| Lymantria dispar MNPV    | isolate 45/0       | LdMNPV-45/0     | KU862282   |
| Lymantria dispar MNPV    | strain H2          | LdMNPV-H2       | MK264918   |
| Lymantria dispar MNPV    | strain J2          | LdMNPV-J2       | MK089451   |
| Lymantria dispar MNPV    | isolate HrB        | LdMNPV-HrB      | MT782112   |
| Lymantria dispar MNPV    | isolate HrB-NJSS   | LdMNPV-HrB-NJSS | MT782113   |
| Lymantria dispar MNPV    | isolate LDMN_Nsk06 | LdMNPV-NsK06    | MK411291   |
| Lymantria dispar MNPV    | isolate LDMN_Nsk07 | LdMNPV-NsK07    | MK411292   |
| Lymantria dispar MNPV    | strain NSh-07      | LdMNPV-NSh07    | MN661137   |
| Lymantria xyliana MNPV   | isolate LyxyMNPV-5 | LyxyMNPV        | NC_013953  |
| Malacosoma neustria NPV  | isolate ManeNPV-T2 | ManeNPV-T2      | NC_040606  |
| Mamestra brassicae MNPV  | Isolate Chb1       | MabrMNPV-Chb1   | JX138237.2 |
| Mamestra brassicae MNPV  | isolate CTa        | MabrMNPV-CTa    | KJ871680   |
| Mamestra brassicae MNPV  | Isolate K1         | MabrMNPV-K1     | NC_023681  |
| Mamestra configurata NPV | Strain A90-2       | McNPV-90-2      | NC_003529  |
| Mamestra configurata NPV | Strain A90-4       | McNPV-90-4      | AF539999   |
| Mamestra configurata NPV | Strain B           | McNPV-B         | NC_004117  |
| Mamestra configurata NPV | isolate 94-2       | McNPV-94        | MN320360   |
| Mamestra configurata NPV | isolate Ls         | McNPV-Ls        | MN395659   |
| Mamestra configurata NPV | isolate SK256      | McNPV-SK256     | MN337871   |
| Mamestra configurata NPV | isolate SK156      | McNPV-SK156     | MK252969   |
| Mamestra configurata NPV | isolate AB260      | McNPV-AB260     | MK409385   |

*The table with Group II alphabaculoviruses continues the next page*

| Denomination               | Strain/Isolate/Genotype | Acronym           | GB Accession |
|----------------------------|-------------------------|-------------------|--------------|
| Mythimna unipuncta NPV     | strain #7               | MyunNPV-7         | NC_043530    |
| Mythimna unipuncta NPV     | strain KY310            | MyunNPV-KY310     | MH124167     |
| Neophasia NPV              | isolate 11              | NespNPV           | MK293724     |
| Olene mendosa NPV          | isolate 435             | OlmeNPV           | MZ766431     |
| Operophtera brumata NPV    | Isolate MA              | OpbrNPV-MA        | NC_040621    |
| Orgyia leucostigma NPV     | Isolate CFS77           | OrleNPV           | NC_010276    |
| Peridroma sp NPV           | isolate GR-167          | PespNPV           | NC_024625    |
| Perigonia lusca SNP        | --                      | PeluSNPV          | NC_027923    |
| Pseudoplusia includens SNP | IE                      | PsinSNPV-IE       | NC_026268    |
| Pseudoplusia includens SNP | IA                      | PsinSNPV-IA       | KU669289     |
| Pseudoplusia includens SNP | IB                      | PsinSNPV-IB       | KU669290     |
| Pseudoplusia includens SNP | IC                      | PsinSNPV-IC       | KU669291     |
| Pseudoplusia includens SNP | ID                      | PsinSNPV-ID       | KU669292     |
| Pseudoplusia includens SNP | IF                      | PsinSNPV-IF       | KU669293     |
| Pseudoplusia includens SNP | IG                      | PsinSNPV-IG       | KU669294     |
| Spodoptera cosmioides NPV  | isolate VPN72           | SpcoNPV           | MK419955     |
| Spodoptera eridania NPV    | isolate 251             | SperNPV-251       | NC_055502    |
| Spodoptera eridania NPV    | isolate CNPSo-165       | SperNPV-CNPSo-165 | MT040195     |
| Spodoptera exempta NPV     | strain 244.1            | SpexNPV           | NC_055455    |

|                               |                          |                  |             |
|-------------------------------|--------------------------|------------------|-------------|
| Spodoptera exigua MNPV        | --                       | SeMNPV           | NC_002169   |
| Spodoptera exigua MNPV        | isolate HT-SeG25         | SeMNPV-HT-SeG25  | HG425347.2  |
| Spodoptera exigua MNPV        | isolate HT-SeG24         | SeMNPV-HT-SeG24  | HG425346    |
| Spodoptera exigua MNPV        | isolate VT-SeAl1         | SeMNPV-VT-SeAl1  | HG425343    |
| Spodoptera exigua MNPV        | isolate HT-SeSP2A        | SeMNPV-HT-SeSP2A | HG425349.2  |
| Spodoptera exigua MNPV        | isolate HT-SeG26         | SeMNPV-HT-SeG26  | HG425348    |
| Spodoptera exigua MNPV        | isolate VT-SeAl2         | SeMNPV-VT-SeAl2  | HG425344    |
| Spodoptera exigua MNPV        | isolate VT-SeOx4         | SeMNPV-VT-SeOx4  | HG425345    |
| Spodoptera exigua MNPV        | isolate SeMNPV-QD        | SeMNPV-QD        | MH370144    |
| Spodoptera exigua MNPV        | isolate WV103            | SeMNPV-WV103     | MN481987    |
| Spodoptera frugiperda MNPV    | Isolate 3AP2             | SfMNPV-3AP2      | NC_009011.2 |
| Spodoptera frugiperda MNPV    | Isolate Nicaraguan       | SfMNPV-Nic       | HM595733    |
| Spodoptera frugiperda MNPV    | Isolate Nicaraguan DefG  | SfMNPV-NicG      | JF899325    |
| Spodoptera frugiperda MNPV    | Strain 19                | SfMNPV-19        | EU258200    |
| Spodoptera frugiperda MNPV    | Isolate Colombian        | SfMNPV-Col       | KF891883    |
| Spodoptera frugiperda MNPV    | isolate ARG-M            | SfMNPV-ARGM      | MW162628    |
| Spodoptera frugiperda MNPV    | isolate IIBBL BCIPV 1197 | SfMNPV-1197      | MK503925    |
| Spodoptera frugiperda MNPV    | isolate IIBBL BCIPV 281  | SfMNPV-281       | MK503923    |
| Spodoptera frugiperda MNPV    | isolate IIBBL BCIPV 459  | SfMNPV-459       | MK503924    |
| Spodoptera frugiperda MNPV    | isolate KA1              | SfMNPV-AKA1      | MZ292981    |
| Spodoptera littoralis NPV     | Isolate AN1956           | SpliNPV-AN1956   | NC_038369   |
| Spodoptera littoralis NPV     | isolate SpliNPV-Tun2     | SpliNPV-Tun2     | MG958660    |
| Spodoptera litura II MNPV     | --                       | SpltnMNPV-II     | NC_011616   |
| Spodoptera litura MNPV        | Strain G2                | SpltnMNPV-G2     | NC_003102   |
| Spodoptera litura NPV         | Strain WV108             | SpltnMNPV-WV108  | MZ290131    |
| Sucra jujuba NPV              | isolate 473              | SujuNPV-473      | KJ676450    |
| Trabala vishnou gigantina NPV | strain wuqi              | TrviNPV          | MW645368    |
| Troides aeacus NPV            | isolate wt               | TraeNPV          | MH077961    |
| Trichoplusia ni SNP           | --                       | TnSNPV           | NC_007383   |

*The table with Group II alphabaculoviruses continues the next page*

| Denomination        | Strain/Isolate/Genotype | Acronym | GB Accession |
|---------------------|-------------------------|---------|--------------|
| Trichoplusia ni SNP | isolate LBIV-4          | TnSNPV  | MH577296     |
| Urbanus proteus NPV | isolate Southern Brazil | UrprNPV | NC_029997.2  |

Betabaculoviruses continue the next **Table S1** section.

| Betabaculovirus               |                         |            |              |
|-------------------------------|-------------------------|------------|--------------|
| Denomination                  | Strain/Isolate/Genotype | Acronym    | GB Accession |
| Adoxophyes orana GV           | --                      | AdorGV     | NC_005038    |
| Adoxophyes orana GV           | Strain Miyazaki         | AdorGV-Miy | KM226332     |
| Agrotis segetum GV            | --                      | AgseGV     | AY522332.4   |
| Agrotis segetum GV            | strain L1               | AgseGV-L1  | KC994902     |
| Agrotis segetum GV            | strain DA               | AgseGV-DA  | NC_039213    |
| Choristoneura occidentalis GV | --                      | ChocGV     | NC_008168    |
| Closteria anachoreta GV       | Isolate HBHN            | ClanGV     | NC_015398    |
| Closteria anastomosis GV      | Strain Henan            | CalGV-H    | NC_022646    |
| Closteria anastomosis GV      | Strain ClasGV-B         | ClasGV-B   | NC_038371    |
| Cnaphalocrocis medinalis GV   | Strain Enping           | CnmeGV-E   | NC_029304.2  |
| Cnaphalocrocis medinalis GV   | --                      | CnmeGV     | KP658210     |
| Cryptophlebia leucotreta GV   | --                      | CrleGV     | NC_005068    |
| Cydia pomonella GV            | --                      | CpGV       | NC_002816    |
| Cydia pomonella GV            | isolate CpGV-E2         | CpGV-E2    | KM217577     |

|                         |                            |            |           |
|-------------------------|----------------------------|------------|-----------|
| Cydia pomonella GV      | isolate CpGV-S             | CpGV-S     | KM217573  |
| Cydia pomonella GV      | isolate CpGV-I12           | CpGV-I12   | KM217576  |
| Cydia pomonella GV      | isolate CpGV-M             | CpGV-M     | KM217575  |
| Cydia pomonella GV      | isolate CpGV-I07           | CpGV-I07   | KM217574  |
| Cydia pomonella GV      | isolate CpGV-ALE           | CpGV-ALE   | MN696165  |
| Cydia pomonella GV      | isolate CpGV-JQ            | CpGV-JQ    | MN696166  |
| Cydia pomonella GV      | isolate CpGV-KS1           | CpGV-KS1   | MN696167  |
| Cydia pomonella GV      | isolate CpGV-KS2           | CpGV-KS2   | MN696168  |
| Cydia pomonella GV      | isolate CpGV-SA            | CpGV-SA    | MN075941  |
| Cydia pomonella GV      | isolate CpGV-WW            | CpGV-WW    | MN696169  |
| Cydia pomonella GV      | isolate CpGV-ZY            | CpGV-ZY    | MN696171  |
| Cydia pomonella GV      | isolate CpGV-ZY2           | CpGV-ZY2   | MN696170  |
| Diatraea saccharalis GV | isolate DisaGV-Parana-2009 | DisaGV-P09 | NC_028491 |
| Epinotia aporema GV     | --                         | EpapGV     | NC_018875 |
| Erinnyis ello ello GV   | Strain BrS86               | ErelGV     | NC_025257 |
| Erinnyis ello GV        | ErelGV_Isolate 00          | ErelGV-00  | KX859082  |
| Erinnyis ello GV        | ErelGV_Isolate 94          | ErelGV-94  | KX859079  |
| Erinnyis ello GV        | ErelGV_Isolate 98          | ErelGV-98  | KX859080  |
| Erinnyis ello GV        | ErelGV_Isolate 99          | ErelGV-99  | KX859081  |
| Erinnyis ello GV        | ErelGV_Isolate AC          | ErelGV-AC  | KX859083  |
| Erinnyis ello GV        | ErelGV_Isolate PA          | ErelGV-PA  | KX859084  |
| Helicoverpa armigera GV | --                         | HearGV     | NC_010240 |
| Hyphantria cunea GV     | isolate Hc1                | HycuGV-Hc1 | MH923363  |

*The table with betabaculoviruses continues the next page*

| Denomination               | Strain/Isolate/Genotype | Acronym       | GB Accession |
|----------------------------|-------------------------|---------------|--------------|
| Matsumuraesia phaseoli GV  | strain IOZ01            | MaphGV        | MT844067     |
| Mocis latipes GV           | isolate Southern Brazil | MolaGV        | NC_029996    |
| Mythimna unipuncta GV      | isolate MyunGV#8        | MyunGV        | NC_033780.2  |
| Phthorimaea operculella GV | --                      | PhopGV        | NC_004062    |
| Phthorimaea operculella GV | isolate SA              | PhopGV-SA     | KU666536     |
| Phthorimaea operculella GV | isolate PhopGV-CR3.1    | PhopGV-CR3.1  | MK033565     |
| Phthorimaea operculella GV | isolate PhopGV-CR5.1    | PhopGV-CR5.1  | MK033566     |
| Phthorimaea operculella GV | isolate PhopGV-CR1.1    | PhopGV-CR1.1  | MK033567     |
| Phthorimaea operculella GV | isolate PhopGV-CR1.2    | PhopGV-CR1.2  | MK033568     |
| Phthorimaea operculella GV | isolate PhopGV-CR2.1    | PhopGV-CR2.1  | MK033569     |
| Phthorimaea operculella GV | isolate PhopGV-IT1.1    | PhopGV-IT1.1  | MK033570     |
| Phthorimaea operculella GV | isolate PhopGV-LS1.1    | PhopGV-LS1.1  | MK033571     |
| Phthorimaea operculella GV | isolate PhopGV-LS1.2    | PhopGV-LS1.2  | MK033572     |
| Phthorimaea operculella GV | isolate PhopGV-LS2.1    | PhopGV-LS2.1  | MK033573     |
| Phthorimaea operculella GV | isolate PhopGV-LS3.1    | PhopGV-LS3.1  | MK033574     |
| Phthorimaea operculella GV | isolate PhopGV-R        | PhopGV-R      | MK033575     |
| Phthorimaea operculella GV | isolate PhopGV-Ym.1     | PhopGV-Ym.1   | MK033576     |
| Pseudaletia unipuncta GV   | Strain Hawaiiin         | PsunGV        | NC_013772    |
| Pieris rapae GV            | Isolate Wuhan           | PiraGV        | NC_013797    |
| Pieris rapae GV            | Strain E3               | PiraGV-E3     | GU111736     |
| Pieris rapae GV            | South Korea             | PiraGV-SK     | JX968491     |
| Pieris rapae GV            | strain WV1010           | PiraGV-WV1010 | MW306663     |
| Plodia interpunctella GV   | isolate Cambridge       | PlinGV        | NC_032255    |
| Plutella xylostella GV     | --                      | PxGV          | NC_002593    |
| Plutella xylostella GV     | isolate SA              | PlxyGV-SA     | KU666537     |
| Plutella xylostella GV     | isolate C               | PlxyGV-C      | KU529791     |
| Plutella xylostella GV     | isolate K               | PlxyGV-K      | KU529792     |

|                          |                 |               |           |
|--------------------------|-----------------|---------------|-----------|
| Plutella xylostella GV   | isolate M       | PlxyGV-M      | KU529793  |
| Plutella xylostella GV   | isolate T       | PlxyGV-T      | KU529794  |
| Plutella xylostella GV   | isolate W       | PlxyGV-W      | MN099284  |
| Plutella xylostella GV   | isolate B       | PlxyGV-B      | MN099285  |
| Plutella xylostella GV   | isolate NW      | PlxyGV-NW     | MN099286  |
| Spodoptera frugiperda GV | isolate VG008   | SpfrGV        | NC_026511 |
| Spodoptera frugiperda GV | isolate ARG     | SpfrGV-ARG    | MH170055  |
| Spodoptera litura GV     | Strain K1       | SpltGV        | NC_009503 |
| Trichoplusia ni GV       | isolate LBIV-12 | TrniGV-LBIV12 | KU752557  |
| Xestia c nigrum GV       | --              | XecnGV        | NC_002331 |

Deltabaculovirus, gammabaculoviruses and other invertebrate viruses continue the next **Table S1** section.

| <i>Deltabaculovirus</i> |                         |         |              |
|-------------------------|-------------------------|---------|--------------|
| Denomination            | Strain/Isolate/Genotype | Acronym | GB Accession |
| Culex nigripalpus NPV   | Florida1997             | CuniNPV | NC_003084    |
| <i>Gammabaculovirus</i> |                         |         |              |
| Denomination            | Strain/Isolate/Genotype | Acronym | GB Accession |
| Neodiprion lecontei NPV | --                      | NeleNPV | NC_005906    |
| Neodiprion sertifer NPV | --                      | NeseNPV | NC_005905    |
| Neodiprion abietis NPV  | --                      | NeabNPV | DQ317692     |

Invertebrate viruses (non-baculoviruses) used.

| Denomination                                         | Strain/Isolate | Acronym     | GB Accession |
|------------------------------------------------------|----------------|-------------|--------------|
| <i>Nudiviridae</i>                                   |                |             |              |
| Gryllus bimaculatus nudivirus                        | --             | GrBNV       | NC_009240.1  |
| Helicoverpa zea nudivirus 2                          | --             | HzNV-2      | NC_004156.2  |
| <i>Hytrosaviridae</i>                                |                |             |              |
| Musca domestica salivary gland hypertrophy virus     | --             | MdSGHV      | NC_010671.1  |
| Glossina pallidipes salivary gland hypertrophy virus | --             | GpSGHV      | NC_010356.1  |
| <i>Nimaviridae</i>                                   |                |             |              |
| White spot syndrome virus                            | CN01           | WSS-CN01    | NC_003225.3  |
| White spot syndrome virus                            | MEX2008        | WSS-MEX2008 | KU216744     |

**Table S2.** Ortholog groups for baculovirus protein genes.

This table is presented in a separate excel file due to its complexity. It shows the orthologous gene groups after the application of OBP. The first row indicates the genomes according to their accession number in GenBank (see **Table S1** for the virus denomination), and the first column indicates the genes using their most frequent name. The cells in the intersection indicate the presence (Y) or non-detection (N) of the corresponding gene. If the gene is detected, its genomic position is indicated.

**Table S3.** Orthologs without candidate gene in deltabaculovirus.

| Baculovirus Protein*   | Synteny conserved? | Conserved protein motif detected among homologous sequences from all baculoviruses | Protein from CuniNPV | % identity** |
|------------------------|--------------------|------------------------------------------------------------------------------------|----------------------|--------------|
| Ac106                  | No                 | YKDFNRRLLLDIF                                                                      | CUN053               | 10.5-20.2    |
| DNA-binding (Ac25)     | No                 | YEIGLRVHGGPCPFIFWDFVTIKGCKGDFGEFF                                                  | not detected         | --           |
| Ac75                   | No                 | --                                                                                 | not detected         | --           |
| Lef-11                 | No                 | CLTRSEIYALTREAINHLKHTNDTEGVCAHHFD                                                  | CUN076               | 6.8-27.7     |
| Chtb1 (Ac145)          | No                 | --                                                                                 | not detected         | --           |
| Ac76                   | No                 | --                                                                                 | not detected         | --           |
| P11 (Ac108)            | No                 | --                                                                                 | not detected         | --           |
| Calyx/Pep/Pp34 (Ac131) | No                 | LWVSADEVLLQLRLP                                                                    | CUN103               | 7.3-19.6     |
| IAP (Ac27)             | No                 | --                                                                                 | not detected         | --           |

\* Homologs detected in all members of alpha-, beta-, and gammabaculoviruses. \*\* Range containing the minimum and maximum identity values obtained from comparing the corresponding CuniNPV protein with respect to the putative homologous ones belonging to the remaining 296 baculoviruses studied.

**Table S4.** Gene orthology among some members of invertebrate virus families.

| Baculovirus core gene | Invertebrate virus |        |        |        |          |             |
|-----------------------|--------------------|--------|--------|--------|----------|-------------|
|                       | GrBNV              | HzNV-2 | GpSGHV | MdSGHV | WSS-CN01 | WSS-MEX2008 |
| 38k                   | Y                  | Y      | N      | N      | N        | N           |
| ac53                  | N                  | N      | N      | N      | N        | N           |
| ac78                  | Y                  | N      | Y      | N      | N        | N           |
| ac81                  | Y                  | Y      | Y      | Y      | N        | N           |
| alk-exo               | N                  | N      | N      | N      | N        | N           |
| bv-odv-c42            | N                  | N      | N      | N      | N        | N           |
| desmoplakin           | N                  | N      | Y      | N      | Y        | Y           |
| DNA polymerase        | N                  | N      | Y      | Y      | Y        | Y           |
| DNA helicase          | Y                  | Y      | Y      | Y      | Y        | Y           |
| lef-1                 | N                  | N      | N      | N      | N        | N           |
| lef-2                 | N                  | N      | N      | N      | N        | N           |
| lef-4                 | N                  | N      | N      | N      | N        | N           |
| lef-5                 | Y                  | Y      | Y      | N      | N        | N           |
| lef-8.                | N                  | N      | N      | N      | N        | N           |
| lef-9                 | N                  | N      | N      | N      | N        | N           |
| odv-e18               | Y                  | N      | Y      | Y      | N        | N           |
| odv-e25               | N                  | N      | N      | N      | N        | N           |
| odv-ec27              | N                  | N      | N      | N      | N        | N           |
| odv-ec43              | N                  | N      | N      | N      | N        | N           |
| p18                   | N                  | N      | N      | N      | N        | N           |
| p33                   | N                  | N      | N      | N      | N        | N           |
| p47                   | N                  | N      | N      | N      | N        | N           |
| p48-p45               | N                  | N      | N      | N      | N        | N           |
| p49                   | N                  | N      | N      | N      | N        | N           |
| p6.9                  | N                  | N      | N      | N      | N        | N           |
| pif-0-p74             | Y                  | Y      | Y      | Y      | Y        | Y           |
| pif-1                 | Y                  | Y      | Y      | Y      | N        | N           |
| pif-2                 | Y                  | Y      | Y      | Y      | Y        | Y           |
| pif-3                 | Y                  | Y      | Y      | Y      | Y        | Y           |
| pif-4                 | Y                  | Y      | N      | N      | N        | N           |
| pif-5                 | Y                  | Y      | Y      | Y      | N        | N           |
| pif-6                 | N                  | N      | N      | N      | N        | N           |



|        |   |   |   |   |   |   |
|--------|---|---|---|---|---|---|
| pif-7  | Y | Y | Y | N | Y | Y |
| pif-8  | N | N | N | N | N | N |
| vlf-1  | N | N | N | N | N | N |
| vp1054 | N | N | N | N | N | N |
| vp39   | N | N | N | N | N | N |

In this study, only the 38 core genes accepted in *Baculoviridae* were considered. Detection of a gene homologous to the corresponding baculoviral gene is indicated by "Y"; non-detection of a gene homologous to the corresponding baculoviral gene is indicated by "N". Genes detected in all studied genomes are highlighted with gray shading. The complete virus names are indicated in **Table S1**.

**Table S5.** Baculovirus unique genes.

This table is presented in a separate excel file due to its complexity. It shows the unique genes (sequences that did not exhibit evident homology with those of other baculoviruses after the application of OBP). The first row indicates the genomes according to their accession number in GenBank (see **Table S1** for the virus denomination), and the first column indicates the putative genes with the names indicated by their authors. The corresponding genomic positions are indicated.

**Table S6.** Baculovirus paralogous genes.

| Paralogous group        | Major protein domain detected (InterPro)                                    |
|-------------------------|-----------------------------------------------------------------------------|
| 94k                     | -                                                                           |
| bro                     | BRO family, N-terminal domain n (PF02498)                                   |
| dbp                     | ssDNA binding protein (PF04786)                                             |
| helicase                | P-loop containing nucleoside triphosphate hydrolases (SSF52540)             |
| iap-2                   | Inhibitor of apoptosis (SSF57924)                                           |
| odv-e66                 | Baculovirus E66 occlusion-derived virus envelope protein (PF04850)          |
| orf57                   | -                                                                           |
| orf66                   | Dual specificity phosphatase, catalytic domain (PF00782)                    |
| p26                     | Nucleopolyhedrovirus p26 protein (PF04766)                                  |
| rr2a                    | Ribonucleotide reductase, small chain (PF00268)                             |
| hypothetical-protein-1  | Per os infectivity (PF05092)                                                |
| hypothetical-protein-10 | Autographa californica nuclear polyhedrosis virus (AcMNPV), Orf17 (PF06856) |
| hypothetical-protein-11 | -                                                                           |
| hypothetical-protein-12 | Nucleic acid-binding proteins (SSF50249)                                    |
| hypothetical-protein-13 | Protein of unknown function (DUF2661) (PF10860)                             |
| hypothetical-protein-14 | -                                                                           |
| hypothetical-protein-15 | Family of unknown function (DUF5863) (PF19181)                              |
| hypothetical-protein-16 | -                                                                           |
| hypothetical-protein-18 | -                                                                           |
| hypothetical-protein-19 | Proliferating cell nuclear antigen signature (PS00293)                      |
| hypothetical-protein-2  | Baculoviridae p74 conserved region (PF04583)                                |
| hypothetical-protein-20 | Peptidase family M60 domain profile (PS51723)                               |
| hypothetical-protein-21 | Nucleopolyhedrovirus P10 protein (PF05531)                                  |
| hypothetical-protein-23 | DNA photolyase (PF00875)                                                    |
| hypothetical-protein-24 | DNA ligase/mRNA capping enzyme, catalytic domain (SSF56091)                 |
| hypothetical-protein-25 | -                                                                           |
| hypothetical-protein-26 | Putative transposase DNA-binding domain (PF07282)                           |
| hypothetical-protein-27 | -                                                                           |
| hypothetical-protein-28 | -                                                                           |
| hypothetical-protein-29 | -                                                                           |

The table continues the next page

| Paralogous group | Major protein domain detected (InterPro) |
|------------------|------------------------------------------|
|------------------|------------------------------------------|

|                         |                                                       |
|-------------------------|-------------------------------------------------------|
| hypothetical-protein-3  | Per os infectivity factor 3 (PF05006)                 |
| hypothetical-protein-30 | -                                                     |
| hypothetical-protein-31 | -                                                     |
| hypothetical-protein-36 | -                                                     |
| hypothetical-protein-37 | -                                                     |
| hypothetical-protein-38 | -                                                     |
| hypothetical-protein-39 | -                                                     |
| hypothetical-protein-4  | Chitin binding Peritrophin-A domain (PF01607)         |
| hypothetical-protein-40 | -                                                     |
| hypothetical-protein-41 | Zinc finger RING-type profile (PS50089)               |
| hypothetical-protein-42 | -                                                     |
| hypothetical-protein-43 | -                                                     |
| hypothetical-protein-44 | Virus envelope protein E26 (PF11050)                  |
| hypothetical-protein-45 | L domain-like (SSF52058)                              |
| hypothetical-protein-46 | -                                                     |
| hypothetical-protein-5  | Baculovirus 19 kDa protein conserved region (PF04798) |
| hypothetical-protein-6  | Baculovirus U-box/Ring-like domain (PF05883)          |
| hypothetical-protein-7  | (Trans)glycosidases (SSF51445)                        |
| hypothetical-protein-8  | ChaB (PF06150)                                        |

The **Table S6** indicates homologous gene clusters where some genomes have more than 1 representative.

**Table S7.** Core genes among baculovirus genera.

|                                                   | AcMNPV<br>#ORF | Gene name and description                                                                                                                                                       | Previously reported genera* | Genera determined in this work* |
|---------------------------------------------------|----------------|---------------------------------------------------------------------------------------------------------------------------------------------------------------------------------|-----------------------------|---------------------------------|
| Core genes for Alpha-, Beta-, and Gammaparvovirus | 8              | <i>polyhedrin granulin</i> , OB protein                                                                                                                                         | A + B + G                   | A + B + G + D                   |
|                                                   | 25             | <i>dbp</i> , DNA binding protein                                                                                                                                                | A + B + G                   | A + B + G                       |
|                                                   | 37             | <i>lef-11</i> , Required for expression of late genes                                                                                                                           | A + B + G                   | A + B + G**                     |
|                                                   | 75             | <i>ac75</i> , Required for BV production                                                                                                                                        | A + B + G                   | A + B + G                       |
|                                                   | 76             | <i>ac76</i> , Unknown function                                                                                                                                                  | A + B + G                   | A + B + G                       |
|                                                   | 106/107        | <i>ac106/107</i> , Unknown function                                                                                                                                             | A + B + G                   | A + B + G**                     |
|                                                   | 108            | <i>ac108</i> , P11 protein, associated with the PIF complex                                                                                                                     | A + B + G                   | A + B + G                       |
|                                                   | 131            | <i>pel/pp34</i> , Involved in morphogenesis of polyhedral envelope                                                                                                              | A + B + G                   | A + B + G**                     |
|                                                   | 145            | <i>ac145</i> , OB protein, involved in oral infection<br>( <i>Ac145 and 150 are predicted to encode a domain thought to bind to chitin</i> )                                    | A + B + G                   | A + B + G                       |
|                                                   | 27             | <i>iap</i> (-1, -2, -3)                                                                                                                                                         | A + B + G                   | A + B + G                       |
| Core gene for Alpha-, Beta-, and Deltaparvovirus  |                | <i>ac23</i> , <i>f</i> -protein, Pathogenicity factor in alphaparvoviruses of group I; fusion protein in alphaparvoviruses of group II, betaparvoviruses, and deltaparvoviruses | A + B + D                   | A + B + D                       |
|                                                   | 23             |                                                                                                                                                                                 |                             |                                 |
| Core genes for Alpha-, and Betaparvovirus         | 10             | <i>pk-1</i> , Protein kinase                                                                                                                                                    | A + B                       | A + B                           |
|                                                   | 13             | <i>ac13</i> , Unknown function                                                                                                                                                  | A + B                       | A + B                           |
|                                                   | 28             | <i>lef-6</i> , Involved in late and very late gene expression                                                                                                                   | A + B                       | A + B                           |
|                                                   | 35             | <i>ubiquitin</i> , Ubiquitin                                                                                                                                                    | A + B                       | A + B                           |
|                                                   | 36             | <i>pp31</i> , Late gene expression factor                                                                                                                                       | A + B                       | A + B                           |
|                                                   | 38             | <i>ac 38</i> , <i>nudix</i> ADP-ribose pyrophosphatase                                                                                                                          | A + B                       | A + B                           |
|                                                   | 61             | <i>fp/25k</i> , Structural protein of BVs and ODVs                                                                                                                              | A + B + G                   | A + B                           |

|  |     |                                                                                                                     |       |       |
|--|-----|---------------------------------------------------------------------------------------------------------------------|-------|-------|
|  | 67  | <i>lef-3</i> , ssDNA binding protein                                                                                | A + B | A + B |
|  | 82  | <i>tlp</i> , Unknown function                                                                                       | A + B | A + B |
|  | 102 | <i>p12</i> , Involved in nuclear localization of G-actin                                                            | A + B | A + B |
|  | 129 | <i>p24</i> , ODV protein                                                                                            | A + B | A + B |
|  | 139 | <i>me53</i> , DNA synthesis regulator, required for efficient BV production                                         | A + B | A + B |
|  | 141 | <i>Exon0</i> , Egress of nucleocapsids from the nucleus to the cytoplasm, interaction with tubulin and microtubules | A + B | A + B |
|  | 146 | <i>ac146</i> , Unknown function                                                                                     | A + B | A + B |
|  | 147 | <i>ie-1</i> , Immediate-early transactivator                                                                        | A + B | A + B |

\*A = *Alphabaculovirus*; B = *Betabaculovirus*; D = *Deltabaculovirus*; G = *Gammabaculovirus*. \*\* More information for CuniNPV ORF candidates in Table S3.

**Table S8.** Distribution of baculoviral species based on K2P distances.

| Genus | Group | Species | #Species | Genomes | ID GenBank                                                                                                                                                                                                                                       | Denomination                                                                                                                                                                    |
|-------|-------|---------|----------|---------|--------------------------------------------------------------------------------------------------------------------------------------------------------------------------------------------------------------------------------------------------|---------------------------------------------------------------------------------------------------------------------------------------------------------------------------------|
| Alpha | I     | 24      | 1        | 20      | KR815455.1, KR815456.1, KR815457.1, KR815458.1, KR815459.1, KR815460.1, KR815461.1, KR815462.1, KR815463.1, KR815464.1, KR815465.1, KR815467.1, KR815468.1, KR815469.1, KR815470.1, KR815471.1, MG746625.1, MG746626.1, NC_008520.2, NC_031761.1 | Anticarsia gemmatalis MNPV                                                                                                                                                      |
|       |       |         | 2        | 13      | JQ071499.1, JQ991008.1, JQ991009.1, JQ991010.1, JQ991011.1, KF306215.1, KF306216.1, KF306217.1, KJ186100.1, LC500465.1, MT501299.1, NC_001962.1, NC_012672.1                                                                                     | Bombyx mandarina NPV (JQ071499.1, NC_012672.1), Bombyx mori NPV                                                                                                                 |
|       |       |         | 3        | 2       | JX404026.1, LC375541.1                                                                                                                                                                                                                           | Philosamia cynthia ricini NPV (JX404026.1), Samia ricini NPV (LC375541.1)                                                                                                       |
|       |       |         | 4        | 9       | EF207986.1, KY979487.1, LC194889.1, LC375537.1, LC375538.1, LC375539.1, LC375540.1, MH797002.1, NC_008035.3                                                                                                                                      | Antheraea pernyi MNPV (EF207986.1, NC_008035.3), Antheraea proylei NPV (KY979487.1, LC194889.1, LC375537.1, LC375539.1, LC375540.1, MH797002.1), Samia cynthia NPV (LC375538.1) |
|       |       |         | 5        | 5       | KM609482.1, KM667940.1, NC_001623.1, NC_008349.1, MH077961.2                                                                                                                                                                                     | Autographa californica MNPV, Plutella xylostella MNPV (NC_008349.1), Troides aeacus NPV (MH077961.2)                                                                            |
|       |       |         | 6        | 2       | LC375542.1, LC375543.1                                                                                                                                                                                                                           | Samia ricini NPV                                                                                                                                                                |
|       |       |         | 7        | 2       | KP747440.1, NC_001875.2                                                                                                                                                                                                                          | Dasychira pudibunda NPV (KP747440.1), Orgyia pseudotsugata MNPV (NC_001875.2)                                                                                                   |
|       |       |         | 8        | 2       | LC516821.1, NC_023177.1                                                                                                                                                                                                                          | Choristoneura diversana nucleopolyhedrovirus ChdiNPV, Choristoneura murinana (NC_023177.1)                                                                                      |
|       |       |         | 9        | 3       | KY550224.1, NC_004778.3, NC_021925.1                                                                                                                                                                                                             | Spilosoma obliqua NPV (KY550224.1), Choristoneura fumiferana MNPV (NC_004778.3), Choristoneura occidentalis NPV (NC_021925.1)                                                   |
|       |       |         | 10       | 2       | OL686893.1, OL686894.1                                                                                                                                                                                                                           | Hyphantria cunea NPV                                                                                                                                                            |

## II

52

|    |    |                                                                                                                                                                                                                                                                                                                                                                                                                                                                                                                                          |                                                                                                                                                                                                                                                                                                                                                                                                                         |
|----|----|------------------------------------------------------------------------------------------------------------------------------------------------------------------------------------------------------------------------------------------------------------------------------------------------------------------------------------------------------------------------------------------------------------------------------------------------------------------------------------------------------------------------------------------|-------------------------------------------------------------------------------------------------------------------------------------------------------------------------------------------------------------------------------------------------------------------------------------------------------------------------------------------------------------------------------------------------------------------------|
| 11 | 1  | JX193905.1                                                                                                                                                                                                                                                                                                                                                                                                                                                                                                                               | Dendrolimus kikuchii NPV                                                                                                                                                                                                                                                                                                                                                                                                |
| 12 | 1  | MK558262.1                                                                                                                                                                                                                                                                                                                                                                                                                                                                                                                               | Dione juno NPV                                                                                                                                                                                                                                                                                                                                                                                                          |
| 13 | 1  | MK293724.1                                                                                                                                                                                                                                                                                                                                                                                                                                                                                                                               | Neophasia NPV                                                                                                                                                                                                                                                                                                                                                                                                           |
| 14 | 1  | NC_003083.1                                                                                                                                                                                                                                                                                                                                                                                                                                                                                                                              | Epiphyas postvittana NPV                                                                                                                                                                                                                                                                                                                                                                                                |
| 15 | 1  | NC_008725.1                                                                                                                                                                                                                                                                                                                                                                                                                                                                                                                              | Maruca vitrata NPV                                                                                                                                                                                                                                                                                                                                                                                                      |
| 16 | 1  | NC_007767.1                                                                                                                                                                                                                                                                                                                                                                                                                                                                                                                              | Hyphantria cunea NPV                                                                                                                                                                                                                                                                                                                                                                                                    |
| 17 | 1  | NC_019945.1                                                                                                                                                                                                                                                                                                                                                                                                                                                                                                                              | Thysanoplusia orichalcea NPV                                                                                                                                                                                                                                                                                                                                                                                            |
| 18 | 1  | NC_021924.1                                                                                                                                                                                                                                                                                                                                                                                                                                                                                                                              | Choristoneura rosaceana NPV                                                                                                                                                                                                                                                                                                                                                                                             |
| 19 | 1  | NC_030240.1                                                                                                                                                                                                                                                                                                                                                                                                                                                                                                                              | Catopsilia pomona                                                                                                                                                                                                                                                                                                                                                                                                       |
| 20 | 1  | NC_026430.1                                                                                                                                                                                                                                                                                                                                                                                                                                                                                                                              | Condylorrhiza vestigialis MNPV                                                                                                                                                                                                                                                                                                                                                                                          |
| 21 | 1  | NC_043520.1                                                                                                                                                                                                                                                                                                                                                                                                                                                                                                                              | Lonomia obliqua MNPV                                                                                                                                                                                                                                                                                                                                                                                                    |
| 22 | 1  | NC_043529.1                                                                                                                                                                                                                                                                                                                                                                                                                                                                                                                              | Oxyplax ochracea NPV                                                                                                                                                                                                                                                                                                                                                                                                    |
| 23 | 1  | NC_055467.1                                                                                                                                                                                                                                                                                                                                                                                                                                                                                                                              | Cyclophragma undans NPV                                                                                                                                                                                                                                                                                                                                                                                                 |
| 24 | 1  | NC_005137.2                                                                                                                                                                                                                                                                                                                                                                                                                                                                                                                              | Choristoneura fumiferana Def MNPV                                                                                                                                                                                                                                                                                                                                                                                       |
| 1  | 27 | JN584482.1, KJ004000.1, KJ701029.1, KJ701030.1, KJ701031.1, KJ701032.1, KJ701033.1, KJ922128.1, KM596835.1, KT013224.1, KU738896.1, KU738897.1, KU738898.1, KU738899.1, KU738900.1, KU738901.1, KU738902.1, KU738903.1, KU738904.1, MG569706.1, MK507817.1, MT810812.1, NC_002654.2, NC_003349.1, NC_003094.2, NC_011354.1, NC_024688.1, KF695050.2, KM386655.1, KP027546.2, KT626570.1, KT626571.1, KT626572.1, KU862282.1, KX618634.1, MK089451.1, MK264918.1, MK411291.1, MK411292.1, MN661137.1, MT782112.1, MT782113.1, NC_001973.1 | Helicoverpa armigera NPV (JN584482.1, KJ701029.1, KJ701030.1, KJ701031.1, KJ701032.1, KJ701033.1, KT013224.1, KU738896.1, KU738897.1, KU738898.1, KU738899.1, KU738900.1, KU738902.1, KU738903.1, NC_003094.2), Helicoverpa zea SNPV (KJ004000.1, KM596835.1, MK507817.1, MT810812.1, NC_002654.2, NC_003349.1), Helicoverpa assulta NPV (MG569706.1), Helicoverpa armigera SNPV (NC_011354.1, NC_024688.1, KJ922128.1) |
| 2  | 16 | KU669289.1, KU669290.1, KU669291.1, KU669292.1, KU669293.1, KU669294.1, MN542938.1, MN542939.1, MN689112.1, MN689113.1, MN689114.1, MN689115.1, MN689116.1, NC_026268.1, EU258200.1, HM595733.1, JF899325.1, KF891883.1, MK503923.1, MK503924.1, MK503925.1, MW162628.1, MZ292981.1, NC_009011.2, HG425343.1, HG425344.1, HG425345.1, HG425346.1, HG425347.2, HG425348.1, HG425349.2, MN481987.1, NC_002169.1                                                                                                                            | Lymantria dispar MNPV                                                                                                                                                                                                                                                                                                                                                                                                   |
| 3  | 14 | KU669289.1, KU669290.1, KU669291.1, KU669292.1, KU669293.1, KU669294.1, MN542938.1, MN542939.1, MN689112.1, MN689113.1, MN689114.1, MN689115.1, MN689116.1, NC_026268.1, EU258200.1, HM595733.1, JF899325.1, KF891883.1, MK503923.1, MK503924.1, MK503925.1, MW162628.1, MZ292981.1, NC_009011.2, HG425343.1, HG425344.1, HG425345.1, HG425346.1, HG425347.2, HG425348.1, HG425349.2, MN481987.1, NC_002169.1                                                                                                                            | Chrysodeixis includens (KU669289.1, KU669290.1, KU669291.1, KU669292.1, KU669293.1, KU669294.1, MN542938.1, MN542939.1, MN689112.1, MN689113.1, MN689114.1, MN689115.1, MN689116.1), Pseudoplusia includens SNPV (NC_026268.1)                                                                                                                                                                                          |
| 4  | 10 | JX138237.2, KJ871680.1, MN337871.1, NC_004117.1, NC_011615.1, NC_023681.1                                                                                                                                                                                                                                                                                                                                                                                                                                                                | Spodoptera frugiperda MNPV                                                                                                                                                                                                                                                                                                                                                                                              |
| 5  | 9  | AF539999.1, MK409385.1, MN320360.1, MN395659.1, NC_003529.1, MZ394738.1, NC_008586.1, KC960018.1                                                                                                                                                                                                                                                                                                                                                                                                                                         | Spodoptera exigua MNPV                                                                                                                                                                                                                                                                                                                                                                                                  |
| 6  | 6  | JX535500.1, JX560539.1, JX560541.1, JX560542.1, NC_007151.1                                                                                                                                                                                                                                                                                                                                                                                                                                                                              | Mamestra brassicae MNPV (JX138237.2, KJ871680.1, NC_023681.1), Mamestra configurata NPV (MN337871.1, NC_004117.1), Helicoverpa armigera MNPV (NC_011615.1)                                                                                                                                                                                                                                                              |
| 7  | 5  |                                                                                                                                                                                                                                                                                                                                                                                                                                                                                                                                          | Mamestra configurata NPV                                                                                                                                                                                                                                                                                                                                                                                                |
| 8  | 3  |                                                                                                                                                                                                                                                                                                                                                                                                                                                                                                                                          | Ectropis obliqua NPV                                                                                                                                                                                                                                                                                                                                                                                                    |
| 9  | 5  |                                                                                                                                                                                                                                                                                                                                                                                                                                                                                                                                          | Chrysodeixis chalcites NPV                                                                                                                                                                                                                                                                                                                                                                                              |

|      |    |    |   |    |                                                                                                                                                                         |   |                                     |                                                                          |
|------|----|----|---|----|-------------------------------------------------------------------------------------------------------------------------------------------------------------------------|---|-------------------------------------|--------------------------------------------------------------------------|
|      |    |    |   |    | 10                                                                                                                                                                      | 3 | KM986882.1, MT561366.1, NC_023442.1 | Buzura suppressaria NPV                                                  |
|      |    |    |   |    | 11                                                                                                                                                                      | 2 | MG958660.1, NC_038369.1             | Spodoptera littoralis NPV                                                |
|      |    |    |   |    | 12                                                                                                                                                                      | 2 | MH577296.1, NC_007383.1             | Trichoplusia ni SNPV                                                     |
|      |    |    |   |    | 13                                                                                                                                                                      | 2 | MZ290131.1, NC_003102.1             | Spodoptera litura NPV (MZ290131.1), Spodoptera litura MNPV (NC_003102.1) |
|      |    |    |   |    | 14                                                                                                                                                                      | 2 | MW173388.1, NC_012639.1             | Gynaephora ruoergensis NPV, Euproctis pseudo-conspersa NPV (NC_012639.1) |
|      |    |    |   |    | 15                                                                                                                                                                      | 1 | MZ127289.1                          | Orgyia pseudotsugata SNPV                                                |
|      |    |    |   |    | 16                                                                                                                                                                      | 1 | MH124167.1                          | Mythimna unipuncta NPV                                                   |
|      |    |    |   |    | 17                                                                                                                                                                      | 1 | MH370144.1                          | Spodoptera exigua MNPV                                                   |
|      |    |    |   |    | 18                                                                                                                                                                      | 1 | MK419956.1                          | Rachiplusia nu MNPV                                                      |
|      |    |    |   |    | 19                                                                                                                                                                      | 1 | MK419955.1                          | Spodoptera cosmioidea NPV                                                |
|      |    |    |   |    | 20                                                                                                                                                                      | 1 | MK746083.1                          | Chrysodeixis includens NPV                                               |
|      |    |    |   |    | 21                                                                                                                                                                      | 1 | MN233792.1                          | Euproctis digramma NPV                                                   |
|      |    |    |   |    | 22                                                                                                                                                                      | 1 | MT040195.1                          | Spodoptera eridania NPV                                                  |
|      |    |    |   |    | 23                                                                                                                                                                      | 1 | MW645368.1                          | Trabala vishnou gigantina NPV                                            |
|      |    |    |   |    | 24                                                                                                                                                                      | 1 | MZ766431.1                          | Olene mendosa NPV                                                        |
|      |    |    |   |    | 25                                                                                                                                                                      | 1 | NC_004690.1                         | Adoxophyes honmai NPV                                                    |
|      |    |    |   |    | 26                                                                                                                                                                      | 1 | NC_007921.1                         | Agrotis segetum NPV                                                      |
|      |    |    |   |    | 27                                                                                                                                                                      | 1 | NC_008293.1                         | Clanis bilineata NPV                                                     |
|      |    |    |   |    | 28                                                                                                                                                                      | 1 | NC_008348.1                         | Leucania separata NPV                                                    |
|      |    |    |   |    | 29                                                                                                                                                                      | 1 | NC_010276.1                         | Orgyia leucostigma NPV                                                   |
|      |    |    |   |    | 30                                                                                                                                                                      | 1 | NC_011345.1                         | Agrotis ipsilon MNPV                                                     |
|      |    |    |   |    | 31                                                                                                                                                                      | 1 | NC_011423.1                         | Adoxophyes orana NPV                                                     |
|      |    |    |   |    | 32                                                                                                                                                                      | 1 | NC_013953.1                         | Lymantria xylinea MNPV                                                   |
|      |    |    |   |    | 33                                                                                                                                                                      | 1 | NC_018504.1                         | Apocheima cinerarium NPV                                                 |
|      |    |    |   |    | 34                                                                                                                                                                      | 1 | NC_021923.1                         | Hemileuca sp NPV                                                         |
|      |    |    |   |    | 35                                                                                                                                                                      | 1 | NC_024625.1                         | Peridroma sp NPV                                                         |
|      |    |    |   |    | 36                                                                                                                                                                      | 1 | NC_025960.1                         | Agrotis segetum NPV                                                      |
|      |    |    |   |    | 37                                                                                                                                                                      | 1 | NC_026922.1                         | Lambdina fiscellaria NPV                                                 |
|      |    |    |   |    | 38                                                                                                                                                                      | 1 | NC_027923.1                         | Perigonia lusca SNPV                                                     |
|      |    |    |   |    | 39                                                                                                                                                                      | 1 | NC_029997.2                         | Urbanus proteus NPV                                                      |
|      |    |    |   |    | 40                                                                                                                                                                      | 1 | NC_040606.1                         | Malacosoma neustria NPV                                                  |
|      |    |    |   |    | 41                                                                                                                                                                      | 1 | NC_040621.1                         | Operophtera brumata NPV                                                  |
|      |    |    |   |    | 42                                                                                                                                                                      | 1 | NC_043530.1                         | Mythimna unipuncta NPV                                                   |
|      |    |    |   |    | 43                                                                                                                                                                      | 1 | NC_055455.1                         | Spodoptera exempta NPV                                                   |
|      |    |    |   |    | 44                                                                                                                                                                      | 1 | NC_055500.1                         | Cryptophlebia peltastica                                                 |
|      |    |    |   |    | 45                                                                                                                                                                      | 1 | OK091173.1                          | Erannis ankeraria                                                        |
|      |    |    |   |    | 46                                                                                                                                                                      | 1 | NC_055453.1                         | Hyposidra talaca NPV                                                     |
|      |    |    |   |    | 47                                                                                                                                                                      | 1 | JX560540.1                          | Chrysodeixis chalcites NPV                                               |
|      |    |    |   |    | 48                                                                                                                                                                      | 1 | MK252969.1                          | Mamestra configurata NPV                                                 |
|      |    |    |   |    | 49                                                                                                                                                                      | 1 | NC_011616.1                         | Spodoptera litura II MNPV                                                |
|      |    |    |   |    | 50                                                                                                                                                                      | 1 | NC_055502.1                         | Spodoptera eridania NPV                                                  |
|      |    |    |   |    | 51                                                                                                                                                                      | 1 | KJ676450.1                          | Sucra jujuba NPV                                                         |
|      |    |    |   |    | 52                                                                                                                                                                      | 1 | KU377538.1                          | Lymantria dispar MNPV                                                    |
| Beta | -- | 26 | 1 | 14 | KM217573.1, KM217574.1, KM217575.1, KM217576.1, KM217577.1, MN075941.1, MN696165.1, MN696166.1, MN696167.1, MN696168.1, MN696169.1, MN696170.1, MN696171.1, NC_002816.1 |   |                                     |                                                                          |
|      |    |    |   |    | Cydia pomonella GV                                                                                                                                                      |   |                                     |                                                                          |

|       |    |   |   |                                                                                                                                                                                                                                  |                            |                         |                                                                                           |                                                                                                                                      |
|-------|----|---|---|----------------------------------------------------------------------------------------------------------------------------------------------------------------------------------------------------------------------------------|----------------------------|-------------------------|-------------------------------------------------------------------------------------------|--------------------------------------------------------------------------------------------------------------------------------------|
| Alpha | 1  | 1 | 1 | KU666536.1, MK033565.1,<br>MK033566.1, MK033567.1,<br>MK033568.1, MK033569.1,<br>MK033570.1, MK033571.1,<br>MK033572.1, MK033573.1,<br>MK033574.1, MK033575.1,<br>MK033576.1, NC_004062.1<br>KU529791.1, KU529792.1, KU529793.1, | Phthorimaea operculella GV |                         |                                                                                           |                                                                                                                                      |
|       |    |   |   |                                                                                                                                                                                                                                  |                            |                         |                                                                                           |                                                                                                                                      |
|       |    |   |   | 3                                                                                                                                                                                                                                |                            | 9                       | KU529794.1, KU666537.1,<br>MN099284.1, MN099285.1,<br>MN099286.1, NC_002593.1             | Plutella xylostella GV                                                                                                               |
|       |    |   |   | 4                                                                                                                                                                                                                                |                            | 7                       | KX859079.1, KX859080.1, KX859081.1,<br>KX859082.1, KX859083.1, KX859084.1,<br>NC_025257.1 | Erinnyis ello GV (KX859079.1, KX859080.1,<br>KX859081.1, KX859082.1, KX859083.1,<br>KX859084.1), Erinnyis ello ello GV (NC_025257.1) |
|       |    |   |   | 5                                                                                                                                                                                                                                |                            | 4                       | GU111736.1, JX968491.1, MW306663.1,<br>NC_013797.1                                        | Pieris rapae GV                                                                                                                      |
|       |    |   |   | 6                                                                                                                                                                                                                                |                            | 3                       | KC994902.1, NC_005839.2,<br>NC_039213.1                                                   | Agrotis segetum GV                                                                                                                   |
|       |    |   |   | 7                                                                                                                                                                                                                                |                            | 2                       | KM226332.1, NC_005038.1                                                                   | Adoxophyes orana GV                                                                                                                  |
|       |    |   |   | 8                                                                                                                                                                                                                                |                            | 2                       | KP658210.1, NC_029304.2                                                                   | Cnaphalocrocis medinalis GV                                                                                                          |
|       |    |   |   | 9                                                                                                                                                                                                                                |                            | 2                       | MH170055.1, NC_026511.1                                                                   | Spodoptera frugiperda GV                                                                                                             |
|       |    |   |   | 10                                                                                                                                                                                                                               |                            | 2                       | KU752557.1, NC_013772.1                                                                   | Trichplusia ni GV (KU752557.1), Pseudaletia<br>unipuncta GV (NC_013772.1)                                                            |
|       |    |   |   | 11                                                                                                                                                                                                                               |                            | 1                       | NC_002331.1                                                                               | Xestia c nigrum GV                                                                                                                   |
|       |    |   |   | 12                                                                                                                                                                                                                               |                            | 1                       | NC_010240.1                                                                               | Helicoverpa armigera GV                                                                                                              |
|       |    |   |   | 13                                                                                                                                                                                                                               |                            | 1                       | MH923363.1                                                                                | Hyphantria cunea GV                                                                                                                  |
|       |    |   |   | 14                                                                                                                                                                                                                               |                            | 1                       | MT844067.1                                                                                | Matsumuraeses phaseoli GV                                                                                                            |
|       |    |   |   | 15                                                                                                                                                                                                                               |                            | 1                       | NC_005068.1                                                                               | Cryptophlebia leucotreta GV                                                                                                          |
|       |    |   |   | 16                                                                                                                                                                                                                               |                            | 1                       | NC_008168.1                                                                               | Choristoneura occidentalis GV                                                                                                        |
|       |    |   |   | 17                                                                                                                                                                                                                               |                            | 1                       | NC_009503.1                                                                               | Spodoptera litura GV                                                                                                                 |
|       |    |   |   | 18                                                                                                                                                                                                                               |                            | 1                       | NC_015398.1                                                                               | Clostera anachoreta GV                                                                                                               |
|       |    |   |   | 19                                                                                                                                                                                                                               |                            | 1                       | NC_018875.1                                                                               | Epinotia aporema GV                                                                                                                  |
|       |    |   |   | 20                                                                                                                                                                                                                               |                            | 1                       | NC_022646.1                                                                               | Clostera anastomosis GV                                                                                                              |
|       |    |   |   | 21                                                                                                                                                                                                                               |                            | 1                       | NC_028491.1                                                                               | Diatraea saccharalis GV                                                                                                              |
|       |    |   |   | 22                                                                                                                                                                                                                               |                            | 1                       | NC_029996.1                                                                               | Mocis latipes GV                                                                                                                     |
|       |    |   |   | 23                                                                                                                                                                                                                               |                            | 1                       | NC_032255.1                                                                               | Plodia interpunctella GV                                                                                                             |
|       |    |   |   | 24                                                                                                                                                                                                                               |                            | 1                       | NC_033780.2                                                                               | Mythimna unipuncta GV                                                                                                                |
|       |    |   |   | 25                                                                                                                                                                                                                               |                            | 1                       | NC_038371.1                                                                               | Clostera anastomosis GV                                                                                                              |
|       |    |   |   | 26                                                                                                                                                                                                                               |                            | 1                       | SPORGV2022.1                                                                              | Spodoptera ornithogalli GV                                                                                                           |
| Gamma | -- | 3 | 1 | 1                                                                                                                                                                                                                                | DQ317692.1                 | Neodiprion abietis NPV  |                                                                                           |                                                                                                                                      |
|       |    |   | 2 | 1                                                                                                                                                                                                                                | NC_005905.1                | Neodiprion sertifer NPV |                                                                                           |                                                                                                                                      |
|       |    |   | 3 | 1                                                                                                                                                                                                                                | NC_005906.1                | Neodiprion lecontei NPV |                                                                                           |                                                                                                                                      |
| Delta | -- | 1 | 1 | 1                                                                                                                                                                                                                                | NC_003084.1                | Culex nigripalpus NPV   |                                                                                           |                                                                                                                                      |
