# Supplementary material for: Protein-Gene Orthology in Baculoviridae: An Exhaustive Analysis to Redefine the Ancestrally Common Coding Sequences
Source: Viruses. 2023 Apr 29;15(5):1091. doi: 10.3390/v15051091 (PMC10223672; doi:10.3390/v15051091)
Supplement: Supplementary file 1 [file viruses-15-01091-s001.zip]

Archive with 5 entries (5 files):
- Supplementary material_Figures.pdf
- Supplementary material_Tables.pdf
- Supplementary material_version 3.zip
- Table S3.xlsx
- Table S5.xlsx
