# Supplementary material for: Protein-Gene Orthology in Baculoviridae: An Exhaustive Analysis to Redefine the Ancestrally Common Coding Sequences
Source: Viruses. 2023 Apr 29;15(5):1091. doi: 10.3390/v15051091 (PMC10223672; doi:10.3390/v15051091)
Supplement: Supplementary file 1 [file viruses-15-01091-s001.zip › Table S3.xlsx]

## Sheet: gene_list
	AF539999.1	DQ317692.1	EF207986.1	EU258200.1	GU111736.1	HG425343.1	HG425344.1	HG425345.1	HG425346.1	HG425347.2	HG425348.1	HG425349.2	HM595733.1	JF899325.1	JN584482.1	JQ071499.1	JQ991008.1	JQ991009.1	JQ991010.1	JQ991011.1	JX138237.2	JX193905.1	JX404026.1	JX535500.1	JX560539.1	JX560540.1	JX560541.1	JX560542.1	JX968491.1	KC960018.1	KC994902.1	KF306215.1	KF306216.1	KF306217.1	KF695050.2	KF891883.1	KJ004000.1	KJ186100.1	KJ676450.1	KJ701029.1	KJ701030.1	KJ701031.1	KJ701032.1	KJ701033.1	KJ871680.1	KJ922128.1	KM217573.1	KM217574.1	KM217575.1
35k-p35	N	N	N	N	N	N	N	N	N	N	N	N	N	N	N	Y(107561:108460)	Y(104650:105549)	Y(105249:106148)	Y(105238:106137)	Y(105297:106196)	N	N	N	N	N	N	N	N	N	N	N	Y(105467:106366)	Y(105094:105993)	Y(104128:105027)	N	N	N	Y(105369:106268)	N	N	N	N	N	N	N	N	N	N	N
38.7k	N	N	N	N	Y	N	N	N	N	N	N	N	N	N	N	N	N	N	N	N	N	N	N	N	N	N	N	N	Y	N	Y(64259:63678)	N	N	N	Y(62891:62712)	N	N	N	N	N	N	N	N	N	N	N	Y(58814:58218)	Y(56115:55513)	Y(58934:58338)
38k	Y(75781:76686)	Y(53408:54325)	Y(52856:53797)	Y(61487:62389)	Y(61744:62649)	Y(63994:64896)	Y(63302:64204)	Y(71020:71922)	Y(63632:64534)	Y(63904:64806)	Y(64046:64948)	Y(63759:64661)	Y(61945:62847)	Y(57085:57987)	Y(80571:79606)	Y(78814:77852)	Y(78107:77145)	Y(78819:77857)	Y(78648:77686)	Y(78952:77990)	Y(73799:74701)	Y(50192:51025)	Y(52092:53033)	Y(90873:89923)	Y(91269:90319)	Y(91043:90093)	Y(91009:90059)	Y(90820:89870)	Y(61322:62227)	Y(94948:94130)	Y(74069:74962)	Y(79125:78163)	Y(78688:77726)	Y(77785:76823)	Y(99107:98139)	Y(63156:64058)	Y(81247:80282)	Y(78869:77907)	Y(85927:85007)	Y(81662:80625)	Y(81088:80123)	Y(81156:80191)	Y(82236:81271)	Y(82046:81081)	Y(75427:76329)	Y(80858:79836)	Y(68944:69975)	Y(66251:67282)	Y(69070:70101)
39k-pp31	Y(137012:137875)	N	Y(111115:110243)	Y(113818:114747)	Y(41979:41116)	Y(116983:117942)	Y(116305:117273)	Y(124041:125009)	Y(116619:117578)	Y(116880:117839)	Y(117051:118007)	Y(116727:117686)	Y(114376:115305)	Y(109516:110445)	Y(27354:26419)	Y(26305:25472)	Y(25478:24645)	Y(26307:25474)	Y(26026:25190)	Y(25488:24655)	Y(137803:138657)	Y(102325:103314)	Y(109738:108866)	Y(28343:27393)	Y(28614:27661)	Y(28513:27563)	Y(28296:27343)	Y(28110:27157)	Y(42030:41167)	Y(39205:38324)	Y(51428:50604)	Y(26521:25688)	Y(26082:25249)	Y(25360:24527)	Y(41408:40617)	Y(115474:116403)	Y(27081:26146)	Y(25788:24955)	Y(28428:27529)	Y(27163:26228)	Y(27022:26090)	Y(27088:26156)	Y(27351:26416)	Y(27169:26234)	Y(137247:138101)	Y(27062:26127)	Y(47373:46630)	Y(47339:46617)	Y(47516:46791)
ac106	Y(60150:60800)	Y(34348:33647)	Y(43289:42534)	Y(48238:48891)	Y(36850:36218)	Y(50628:51296)	Y(50055:50723)	Y(57773:58441)	Y(50274:50942)	Y(50670:51338)	Y(50672:51340)	Y(50400:51068)	Y(48172:48825)	Y(43312:43965)	Y(96174:96935)	Y(86044:86793)	Y(85402:86151)	Y(86052:86801)	Y(86028:86777)	Y(86168:86917)	Y(57822:58463)	Y(36816:36037)	Y(42457:41699)	Y(106334:105654)	Y(106712:106032)	Y(106504:105824)	Y(106455:105766)	Y(106263:105583)	Y(36885:36253)	Y(130011:129319)	Y(48248:47589)	Y(86279:87028)	Y(85912:86661)	Y(84939:85688)	Y(138010:137273)	Y(49694:50347)	Y(96421:97182)	Y(86173:86922)	Y(100228:99518)	Y(97002:97763)	Y(95965:96726)	Y(96033:96794)	Y(97551:98312)	Y(97364:98125)	Y(57116:57757)	Y(95975:96736)	Y(44678:43938)	Y(44645:43905)	Y(44839:44099)
ac108	Y(69310:68999)	Y(65158:65367)	Y(41956:42264)	Y(54866:54522)	Y(40876:41091)	Y(57350:57006)	Y(56658:56314)	Y(64376:64032)	Y(56988:56644)	Y(57260:56916)	Y(57402:57058)	Y(57115:56771)	Y(55327:54983)	N	Y(87688:87972)	N	N	N	N	N	Y(67328:67017)	Y(35707:36045)	Y(41120:41428)	Y(97658:97942)	Y(98054:98338)	Y(97828:98112)	Y(97794:98078)	Y(97605:97889)	Y(40927:41142)	Y(102640:102900)	Y(49885:50196)	N	N	N	Y(107202:107492)	Y(56538:56194)	Y(88364:88648)	N	Y(93532:93789)	Y(88801:89085)	Y(88204:88488)	Y(88272:88556)	Y(89352:89636)	Y(89164:89448)	Y(68956:68645)	Y(87918:88202)	Y(46344:46553)	Y(46329:46538)	Y(46505:46714)
ac11	N	N	Y(122799:121789)	N	N	N	N	N	N	N	N	N	N	N	N	Y(4276:3254)	Y(4270:3248)	Y(4276:3254)	Y(4270:3248)	Y(4267:3245)	N	Y(126346:127389)	Y(121603:120593)	N	N	N	N	N	N	N	N	Y(4276:3254)	Y(4270:3248)	Y(4270:3248)	Y(36291:35206)	N	N	Y(4258:3236)	N	N	N	N	N	N	N	N	N	N	N
ac111	N	N	Y(40071:40319)	N	N	N	N	N	N	N	N	N	N	N	Y(110820:111035)	Y(88756:88553)	Y(88114:87911)	Y(88764:88561)	Y(88740:88537)	Y(88880:88677)	N	Y(32713:32916)	Y	Y(70227:69997)	Y(70631:70401)	Y(70398:70168)	Y(70361:70131)	Y(70162:69932)	N	N	N	Y(88991:88788)	Y(88624:88421)	Y(87651:87448)	Y(71714:71989)	N	Y(110760:110975)	Y(88885:88682)	Y(114033:113827)	Y(111750:111965)	Y(110735:110950)	Y(110778:110993)	Y(112294:112509)	Y(112105:112320)	N	Y(110314:110529)	N	N	N
AC117	Y(54956:54615)	N	Y(37237:36992)	Y(44789:44481)	N	Y(46784:46473)	Y(46213:45902)	Y(53929:53618)	Y(46442:46131)	Y(46822:46511)	Y(46828:46517)	Y(46558:46247)	Y(44723:44415)	Y(39863:39555)	Y(103109:103375)	Y(91455:91742)	Y(90832:91119)	Y(91452:91739)	Y(91427:91714)	Y(91485:91772)	Y(53116:52820)	Y(28915:28613)	N	N	N	N	N	N	N	N	N	Y(91678:91965)	Y(91329:91610)	Y(90339:90626)	Y(109476:109174)	Y(46245:45937)	Y(103307:103606)	Y(91574:91861)	Y(104202:104513)	Y(103888:104196)	Y(102846:103154)	Y(102914:103222)	Y(104437:104745)	Y(104250:104558)	Y(52483:52145)	Y(102861:103160)	N	N	N
ac118	N	N	N	N	N	N	N	N	N	N	N	N	N	N	N	N	N	N	N	N	N	N	N	N	N	N	N	N	N	N	N	N	N	N	N	N	N	N	N	N	N	N	N	N	N	N	N	N	N
AC120	Y(44980:45225)	N	Y(34455:34204)	Y(35116:35373)	N	Y(37942:38184)	Y(37370:37612)	Y(45086:45328)	Y(37598:37840)	Y(37983:38225)	Y(37986:38228)	Y(37716:37958)	Y(35045:35302)	Y(30185:30442)	Y(105026:105262)	Y(93471:93719)	Y(92842:93090)	Y(93462:93710)	Y(93437:93685)	Y(93495:93743)	Y(43798:44043)	Y(25462:25734)	Y(33275:33024)	N	N	N	N	N	N	Y(112212:111943)	N	Y(93686:93934)	Y(93331:93579)	Y(92347:92595)	Y(153645:153866)	Y(36555:36812)	Y(105257:105493)	Y(93582:93830)	Y(131440:131201)	Y(105849:106085)	Y(104806:105042)	Y(104874:105110)	Y(106396:106632)	Y(106211:106447)	Y(43074:43319)	Y(104811:105047)	N	N	N
ac122	N	N	Y(33354:34031)	N	N	N	N	N	N	N	N	N	N	N	N	Y(94076:93888)	Y(93444:93259)	Y(94064:93879)	Y(94038:93853)	Y(94097:93912)	N	Y(26103:25879)	Y(32179:32874)	N	N	N	N	N	N	N	N	Y(94288:94103)	Y(93933:93748)	Y(92949:92764)	N	N	N	Y(94184:93999)	N	N	N	N	N	N	N	N	N	N	N
AC132	Y(50698:50291)	N	Y(25087:24413)	Y(41140:40769)	N	Y(44263:43871)	Y(43692:43300)	Y(51408:51016)	Y(43920:43528)	Y(44303:43911)	Y(44306:43914)	Y(44037:43645)	Y(41066:40695)	Y(36206:35835)	Y(115075:115665)	Y(102939:103601)	Y(102229:102891)	Y(102837:103499)	Y(102819:103481)	Y(102879:103541)	Y(49518:49117)	Y(14267:13674)	Y(26407:25736)	Y(120744:121142)	Y(121127:121525)	Y(120135:120533)	Y(120091:120489)	Y(120677:121075)	N	N	N	Y(103064:103726)	Y(102691:103353)	Y(101725:102387)	N	Y(42586:42215)	Y(115009:115599)	Y(102956:103618)	N	Y(116001:116591)	Y(114986:115576)	Y(115029:115619)	Y(116545:117135)	Y(116350:116940)	Y(48796:48395)	Y(114563:115153)	N	N	N
ac146	Y(146964:147539)	N	Y(10196:10765)	Y(125529:126170)	Y(4396:4956)	Y(128403:129008)	Y(127723:128328)	Y(135459:136064)	Y(128055:128660)	Y(128307:128912)	Y(128480:129085)	Y(128157:128762)	Y(125953:126594)	Y(121033:121674)	Y(11297:10686)	Y(118241:117636)	Y(115505:114900)	Y(116099:115494)	Y(116324:115719)	Y(116155:115550)	Y(147732:148307)	Y(2027:2638)	Y(10402:10971)	Y(16559:15936)	Y(16834:16211)	Y(16727:16104)	Y(16515:15892)	Y(16330:15707)	Y(4393:4953)	Y(25412:26014)	Y(8485:9087)	Y(116423:115818)	Y(116057:115452)	Y(115085:114480)	Y(17209:17832)	Y(127199:127840)	Y(11333:10722)	Y(116229:115624)	Y(23262:22639)	Y(11311:10700)	Y(11259:10648)	Y(11266:10655)	Y(11276:10665)	Y(11275:10664)	Y(147172:147747)	Y(11315:10704)	Y(4992:5570)	Y(4939:5517)	Y(4963:5541)
ac18	Y(49087:50256)	N	Y(116855:117916)	Y(39600:40754)	N	Y(42645:43805)	Y(42073:43233)	Y(49789:50949)	Y(42301:43461)	Y(42686:43846)	Y(42689:43849)	Y(42419:43579)	Y(39529:40683)	Y(34669:35823)	N	Y(10425:9355)	Y(10457:9387)	Y(10425:9355)	Y(10472:9399)	Y(10460:9384)	Y(47915:49078)	Y(119364:120440)	Y(115500:116561)	Y(123641:122325)	Y(124024:122708)	Y(123032:121716)	Y(122988:121672)	Y(123574:122258)	N	Y(106884:108065)	N	Y(10471:9401)	Y(10460:9390)	Y(10460:9390)	Y(157369:156248)	Y(41046:42200)	N	Y(10447:9377)	Y(126507:127745)	N	N	N	N	N	Y(47193:48356)	N	N	N	N
ac19	Y(49088:48756)	N	Y(116853:116542)	Y(39601:39263)	N	Y(42646:42311)	Y(42074:41739)	Y(49790:49455)	Y(42302:41967)	Y(42687:42352)	Y(42690:42355)	Y(42420:42085)	Y(39530:39192)	Y(34670:34332)	Y(108013:107624)	Y(10427:10759)	Y(10459:10791)	Y(10427:10759)	Y(10474:10806)	Y(10462:10797)	Y(47916:47578)	Y(119362:119021)	Y(115498:115187)	Y(123643:124032)	Y(124026:124415)	Y(123034:123423)	Y(122990:123379)	Y(123576:123965)	N	Y	N	Y(10473:10805)	Y(10462:10794)	Y(10462:10794)	Y(157356:157712)	Y(41047:40709)	Y(108243:107854)	Y(10449:10781)	Y(126508:126065)	Y(108831:108442)	Y(107794:107405)	Y(107862:107473)	Y(109376:108987)	Y(109194:108805)	Y(47194:46856)	Y(107797:107408)	N	N	N
ac25	N	N	N	N	N	N	N	N	N	N	N	N	N	N	N	N	N	N	N	N	N	N	N	N	N	N	N	N	N	N	N	N	N	N	Y(36641:37360)	N	N	N	N	N	N	N	N	N	N	N	N	N	N
ac26	Y(139659:139300)	N	Y(102137:102526)	Y(116994:116593)	N	Y(120691:120284)	Y(120019:119612)	Y(127755:127348)	Y(120331:119924)	Y(120585:120178)	Y(120757:120350)	Y(120439:120032)	Y(117360:116959)	Y(112500:112099)	Y(21617:22018)	Y(17206:17595)	Y(17234:17623)	Y(17206:17595)	Y(17255:17644)	Y(17239:17628)	Y(140458:140102)	Y(108146:107733)	Y(100997:101386)	Y(24248:24658)	Y(24517:24927)	Y(24416:24826)	Y(24198:24608)	Y(24013:24423)	N	N	N	Y(17228:17617)	Y(17212:17601)	Y(17216:17605)	Y(36596:36225)	Y(118658:118257)	Y(21565:22041)	Y(17205:17594)	N	Y(21548:22024)	Y(21503:21979)	Y(21507:21983)	Y(21513:21989)	Y(21514:21990)	Y(139904:139548)	Y(21547:22023)	N	N	N
ac29	Y(141458:141213)	N	Y(103981:103778)	Y(118877:118593)	Y(13546:13782)	Y(122642:122382)	Y(121970:121710)	Y(129706:129446)	Y(122282:122022)	Y(122539:122279)	Y(122708:122448)	Y(122395:122135)	Y(119247:118963)	Y(114387:114103)	Y(19570:19773)	Y(19321:19106)	Y(19362:19147)	Y(19323:19108)	Y(19311:19096)	Y(19368:19153)	Y(142244:141999)	N	Y(102841:102638)	Y(22329:22628)	Y(22605:22904)	Y(22497:22796)	Y(22286:22585)	Y(22101:22400)	Y(13543:13779)	N	Y(13717:13944)	Y(19353:19138)	Y(19333:19118)	Y(19328:19113)	Y(38240:38034)	Y	Y(19594:19797)	Y(19330:19115)	Y(11438:11656)	Y(19577:19780)	Y(19532:19735)	Y(19539:19742)	Y(19542:19745)	Y(19543:19746)	Y(141690:141445)	Y(19576:19779)	Y(15275:15502)	Y(15156:15383)	Y(15171:15398)
ac34	Y(138412:138957)	N	Y(110132:109320)	Y(115652:116188)	N	Y(118885:119439)	Y(118213:118767)	Y(125949:126503)	Y(118524:119078)	Y(118779:119333)	Y(118950:119504)	Y(118632:119186)	Y(116208:116744)	Y(111348:111884)	Y(25107:24340)	Y(25168:24521)	Y(24338:23691)	Y(25170:24523)	Y(24892:24245)	Y(24348:23701)	Y(139206:139751)	Y(103655:104272)	Y(108755:107943)	Y(26712:26071)	Y(26981:26340)	Y(26881:26240)	Y(26661:26020)	Y(26476:25835)	N	Y(37339:36770)	N	Y(25390:24743)	Y(24951:24304)	Y(24229:23582)	Y(39916:39350)	Y(117312:117848)	Y(24830:24063)	Y(24651:24004)	Y(26134:25586)	Y(24915:24148)	Y(24771:24004)	Y(24843:24076)	Y(25097:24330)	Y(24915:24148)	Y(138652:139197)	Y(24812:24045)	Y	Y	Y
AC4	Y(63359:63832)	N	Y(124856:124407)	Y(29836:30390)	N	Y(32677:33384)	Y(32102:32809)	Y(39818:40525)	Y(32330:33040)	Y(32718:33425)	Y(32721:33428)	Y(32451:33158)	Y(29765:30319)	Y(24905:25459)	N	Y(128546:128091)	Y(125025:124570)	Y(126365:125910)	Y(125778:125323)	Y(125743:125288)	Y(61401:61877)	Y(131107:130838)	Y(123971:123522)	N	N	N	N	N	N	N	Y(60327:59920)	Y(126801:126346)	N	N	N	Y(31275:31829)	N	Y(125763:125308)	Y(94313:93807)	N	N	N	N	N	Y(61050:61526)	N	N	N	N
AC43	Y(129644:129444)	N	Y(97457:97245)	Y(108087:107908)	N	Y(111076:110903)	Y(110398:110225)	Y(118134:117961)	Y(110712:110539)	Y(110976:110803)	Y(111144:110971)	Y(110823:110650)	Y(108636:108457)	Y(103776:103597)	Y(31835:32077)	Y(31762:31998)	Y(30937:31173)	Y(31764:32000)	Y(31485:31721)	Y(30947:31183)	Y(130348:130148)	Y(95865:95647)	N	Y(33041:33229)	Y(33309:33497)	Y(33211:33399)	Y(32994:33182)	Y(32805:32993)	N	Y	N	Y(31980:32216)	Y(31541:31777)	Y(30810:31046)	N	Y(109743:109564)	Y(31561:31803)	Y(31247:31483)	N	Y(31652:31894)	Y(31511:31753)	Y(31577:31819)	Y(31840:32082)	Y(31658:31900)	Y(129997:129797)	Y(31542:31784)	N	N	N
ac44	N	Y(35660:36133)	Y(97294:96905)	N	N	N	N	N	N	N	N	N	N	N	N	Y(31979:32374)	Y(31154:31549)	Y(31981:32376)	Y(31702:32097)	Y(31164:31559)	N	Y(95666:95271)	N	N	N	N	N	N	N	N	N	Y(32197:32592)	Y(31758:32153)	Y(31027:31422)	N	N	N	Y(31464:31859)	N	N	N	N	N	N	N	N	N	N	N
AC5	Y(13587:13895)	N	N	Y(14546:14881)	Y(25559:25873)	Y(15763:16080)	Y(15180:15497)	Y(15198:15515)	Y(15405:15725)	Y(15791:16099)	Y(15791:16114)	Y(15534:15851)	Y(14498:14833)	Y(14498:14833)	N	Y(128575:128904)	Y(125054:125383)	Y(126394:126723)	Y(125807:126136)	Y(125772:126101)	Y(13753:14064)	Y(131087:131689)	N	N	N	N	N	N	Y(25593:25907)	N	Y(33549:33884)	Y(126830:127159)	Y(125335:125664)	Y(124366:124695)	Y(134669:134938)	Y(14505:14840)	N	Y(125792:126121)	Y(110450:110818)	Y(113070:112675)	Y(112055:111660)	Y(112098:111703)	Y(113614:113219)	Y(113425:113030)	Y(13775:14086)	N	Y(33309:33626)	Y(33329:33646)	Y(33481:33798)
ac52	Y(122763:123263)	N	N	Y(101615:102154)	N	Y(104354:104896)	Y(103667:104212)	Y(111406:111948)	Y(103986:104528)	Y(104248:104790)	Y(104422:104958)	Y(104095:104637)	Y(102164:102703)	Y(97304:97843)	Y(38066:37524)	Y(39901:39317)	Y(39050:38466)	Y(39903:39319)	Y(39599:39015)	Y(39064:38480)	Y(120868:121371)	Y(88615:89118)	N	Y(40008:39367)	Y(40277:39636)	Y(40177:39536)	Y(39958:39317)	Y(39771:39130)	N	Y	N	Y(40071:39487)	Y(39654:39070)	Y(38923:38339)	Y(52249:51560)	Y(103272:103811)	Y(38217:37672)	Y(39359:38775)	Y(39895:39221)	Y(37880:37335)	Y(37738:37193)	Y(37805:37260)	Y(38068:37523)	Y(37887:37342)	Y(122462:122965)	Y(37771:37226)	N	N	N
ac53	Y(122764:122291)	Y(72379:71924)	Y(89424:88984)	Y(101559:101146)	Y(102156:102557)	Y(104291:103878)	Y(103604:103191)	Y(111343:110930)	Y(103923:103510)	Y(104185:103772)	Y(104359:103946)	Y(104032:103619)	Y(102108:101695)	Y(97248:96835)	Y(38184:38594)	Y(39903:40322)	Y(39052:39471)	Y(39905:40324)	Y(39601:40020)	Y(39066:39485)	Y(120869:120396)	Y(88616:88044)	Y(88588:88148)	Y(40069:40485)	Y(40338:40754)	Y(40238:40654)	Y(40019:40435)	Y(39832:40248)	Y(102335:102736)	Y(51476:51733)	Y(118844:119254)	Y(40073:40492)	Y(39656:40075)	Y(38925:39344)	Y(52140:52568)	Y(103216:102803)	Y(38333:38743)	Y(39361:39780)	Y(39855:40328)	Y(37997:38407)	Y(37854:38264)	Y(37921:38331)	Y(38185:38595)	Y(38004:38414)	Y(122463:121990)	Y(37869:38297)	Y(116232:116633)	Y(113815:114216)	Y(116542:116943)
ac55	Y(119939:119724)	N	Y(87729:87520)	Y(98976:98632)	Y(93438:93590)	Y(101329:101126)	Y(100642:100439)	Y(108381:108178)	Y(100961:100758)	Y(101223:101020)	Y(101397:101194)	Y(101070:100867)	Y(99525:99181)	Y(94665:94321)	Y(41195:41401)	Y(41592:41819)	Y(40741:40974)	Y(41594:41821)	Y(41290:41523)	Y(40755:40988)	Y(118001:117792)	Y(86809:86555)	Y(86893:86549)	Y(43058:43315)	Y(43327:43584)	Y(43227:43484)	Y(43008:43265)	Y(42821:43078)	Y(93005:93157)	Y(54443:54640)	Y(107932:108108)	N	N	Y(40614:40841)	Y(55000:55269)	Y(100633:100289)	Y(41344:41550)	Y(41050:41283)	Y(43039:43242)	Y(41008:41214)	Y(40859:41065)	Y(40926:41132)	Y(41190:41396)	Y(41015:41221)	Y(119574:119365)	Y(40898:41104)	Y(103710:103925)	Y(101247:101462)	Y(104019:104234)
ac56	Y(119782:119513)	N	N	Y(98741:98364)	N	Y(101235:100909)	Y(100548:100216)	Y(108287:107955)	Y(100867:100541)	Y(101129:100803)	Y(101303:100971)	Y(100976:100644)	Y(99290:98913)	Y(94430:94053)	Y(41402:41596)	Y(41821:42075)	Y(40976:41230)	Y(41823:42077)	Y(41525:41779)	Y(40990:41244)	Y(117850:117581)	Y(86478:86281)	N	Y(43257:43565)	Y(43526:43834)	Y(43426:43734)	Y(43207:43515)	Y(43020:43328)	N	Y(54618:54929)	N	Y(41985:42239)	Y(41568:41822)	Y(40843:41097)	N	Y(100398:100021)	Y(41551:41745)	Y(41285:41539)	Y(43184:43534)	Y(41215:41409)	Y(41066:41260)	Y(41133:41327)	Y(41397:41591)	Y(41222:41416)	Y(119423:119154)	Y(41105:41299)	N	N	N
AC57	Y(119263:118784)	N	Y(86702:86169)	Y(98129:97644)	N	Y(100749:100207)	Y(100056:99514)	Y(107795:107253)	Y(100381:99842)	Y(100643:100101)	Y(100811:100272)	Y(100484:99945)	Y(98678:98193)	Y(93818:93333)	Y(41875:42390)	Y(42329:42814)	Y(41483:41968)	Y(42331:42816)	Y(42021:42506)	Y(41497:41982)	Y(117331:116852)	Y(86094:85603)	Y(85878:85375)	Y(43769:44281)	Y(44038:44550)	Y(43938:44450)	Y(43719:44231)	Y(43532:44044)	N	Y(55267:55752)	N	Y(42492:42977)	Y(42076:42561)	Y(41351:41836)	Y(55523:56005)	Y(99786:99301)	Y(42025:42516)	Y(41778:42263)	Y(43717:44208)	Y(41689:42180)	Y(41540:42031)	Y(41607:42098)	Y(41871:42362)	Y(41696:42187)	Y(118904:118425)	Y(41579:42070)	N	N	N
AC63	N	N	N	N	N	N	N	N	N	N	N	N	N	N	Y(114480:114944)	Y(46039:46506)	Y(45197:45664)	Y(46041:46508)	Y(45726:46193)	Y(45211:45678)	N	Y(82163:81681)	N	Y(30097:29564)	Y(30365:29835)	Y(30267:29734)	Y(30050:29517)	Y(29861:29331)	N	Y(41930:41478)	N	Y(46200:46667)	Y(45784:46251)	Y(45059:45523)	Y(115380:114916)	N	Y(114414:114878)	Y(45487:45954)	N	Y(115406:115870)	Y(114391:114855)	Y(114434:114898)	Y(115950:116414)	Y(115755:116219)	N	Y(113941:114432)	Y(90423:90016)	Y(87961:87575)	Y(90729:90352)
ac72	N	N	Y(73584:73411)	N	N	N	N	N	N	N	N	N	N	N	N	Y(56280:56462)	Y(55453:55635)	Y(56282:56464)	Y(55996:56178)	Y(55478:55660)	N	Y(70743:70537)	Y	N	N	N	N	N	N	N	N	Y(56462:56644)	Y(56046:56228)	Y(55321:55503)	N	N	N	Y(55754:55936)	N	N	N	N	N	N	N	N	N	N	N
ac73	N	N	Y(73145:73402)	N	N	N	N	N	N	N	N	N	N	N	N	Y(56771:56472)	Y(55944:55645)	Y(56773:56474)	Y(56488:56189)	Y(55969:55670)	N	Y(70226:70528)	Y(72366:72623)	N	N	N	N	N	N	N	N	Y(56956:56657)	Y(56540:56241)	Y(55813:55514)	N	N	N	Y(56245:55946)	N	N	N	N	N	N	N	N	N	N	N
AC76	Y(108159:107902)	Y(41308:41078)	Y(71958:72212)	Y(91252:90995)	Y(79607:79861)	Y(94218:93961)	Y(93526:93269)	Y(101265:101008)	Y(93828:93571)	Y(94087:93830)	Y(94259:94002)	Y(93937:93680)	Y(91794:91537)	Y(86934:86677)	Y(63130:62873)	Y(58272:58015)	Y(57442:57185)	Y(58274:58017)	Y(57989:57732)	Y(57467:57210)	Y(106254:105997)	Y(68758:69018)	Y(71178:71432)	Y(50665:50922)	Y(50971:51228)	Y(50834:51091)	Y(50640:50897)	Y(50465:50722)	Y(79170:79424)	Y(76072:75815)	Y(94002:94259)	Y(58451:58194)	Y(58035:57778)	Y(57308:57051)	Y(82286:82026)	Y(92933:92676)	Y(63789:63532)	Y(57743:57486)	Y(68031:67774)	Y(64210:63953)	Y(63636:63379)	Y(63703:63446)	Y(64782:64525)	Y(64598:64341)	Y(107849:107592)	Y(63343:63086)	Y(88205:88459)	Y(85735:85989)	Y(88508:88762)
ac78	Y(95465:95809)	Y(42345:42628)	Y(70518:70829)	Y(79148:79495)	Y(78211:78504)	Y(80502:80891)	Y(79810:80199)	Y(87552:87941)	Y(80115:80504)	Y(80393:80785)	Y(80547:80936)	Y(80262:80651)	Y(79614:79961)	Y(74754:75101)	Y(64760:64428)	Y(59771:59439)	Y(58935:58603)	Y(59773:59441)	Y(59476:59144)	Y(58960:58628)	Y(93376:93831)	Y(67039:67410)	Y(69738:70049)	Y(75258:74890)	Y(75664:75296)	Y(75429:75061)	Y(75392:75024)	Y(75197:74829)	Y(77774:78067)	Y(77770:77438)	Y(91986:92303)	Y(59953:59621)	Y(59534:59202)	Y(58810:58478)	Y(83821:83486)	Y(80825:81172)	Y(65419:65087)	Y(59236:58904)	Y(69710:69378)	Y(65843:65511)	Y(65269:64937)	Y(65336:65004)	Y(66415:66083)	Y(66231:65899)	Y(94991:95446)	Y(64985:64641)	Y(86757:87017)	Y(84287:84547)	Y(87059:87319)
ac81	Y(93782:94498)	Y(43485:44012)	Y(68494:69138)	Y(77422:78156)	Y(76731:77321)	Y(78774:79502)	Y(78082:78810)	Y(85824:86552)	Y(78396:79115)	Y(78674:79393)	Y(78819:79547)	Y(78543:79262)	Y(77889:78623)	Y(73029:73763)	Y(66452:65727)	Y(61996:61292)	Y(61160:60456)	Y(61998:61294)	Y(61698:60991)	Y(61185:60481)	Y(91804:92526)	Y(65069:65494)	Y(67714:68358)	Y(76856:76182)	Y(77262:76588)	Y(77027:76353)	Y(76990:76316)	Y(76795:76121)	Y(76295:76885)	Y(79488:78901)	Y(90363:90956)	Y(62178:61474)	Y(61759:61055)	Y(61035:60331)	Y(85438:84770)	Y(79099:79833)	Y(67111:66386)	Y(61461:60757)	Y(71621:70932)	Y(67535:66810)	Y(66961:66236)	Y(67028:66303)	Y(68107:67382)	Y(67923:67198)	Y(93419:94141)	Y(66704:65940)	Y(85207:85782)	Y(82725:83300)	Y(85509:86084)
ac91	N	N	Y(61008:61622)	N	N	N	N	N	N	N	N	N	N	N	N	Y(70391:69918)	Y(69709:69245)	Y(70396:69923)	Y(70236:69775)	Y(69749:69264)	N	N	Y(60244:60819)	N	N	N	N	N	N	N	N	Y(70724:70260)	N	Y(69389:68925)	N	N	N	Y(69681:69217)	N	N	N	N	N	N	N	N	N	N	N
AcOrf-113	N	N	N	N	N	N	N	N	N	N	N	N	N	N	N	N	N	N	N	N	N	N	N	N	N	N	N	N	N	Y(105413:106399)	N	N	N	N	Y(107526:108863)	N	N	N	Y(94746:95765)	N	N	N	N	N	N	N	N	N	N
acorf-116	N	N	N	N	N	N	N	N	N	N	N	N	N	N	N	Y(91519:91349)	Y(90896:90726)	Y(91516:91343)	Y(91491:91318)	Y(91549:91379)	N	N	N	N	N	N	N	N	N	N	N	Y(91742:91569)	Y(91387:91217)	Y(90403:90230)	N	N	N	Y(91638:91465)	N	N	N	N	N	N	N	N	N	N	N
AcOrf-12	N	N	Y(31534:32166)	N	N	N	N	N	N	N	N	N	N	N	N	N	N	N	N	N	N	Y(126042:125332)	N	N	N	N	N	N	N	N	N	N	N	N	Y(161943:161674)	N	N	N	Y(52471:53133)	N	N	N	N	N	N	N	N	N	N
acorf-121	N	N	N	N	N	N	N	N	N	N	N	N	N	N	N	Y(93822:93998)	Y(93193:93366)	Y(93813:93986)	Y(93787:93960)	Y(93846:94019)	N	N	N	N	N	N	N	N	N	N	N	Y(94037:94210)	Y(93682:93855)	Y(92698:92871)	N	N	N	Y(93933:94106)	N	N	N	N	N	N	N	N	N	N	N
acorf-149	N	N	N	N	N	N	N	N	N	N	N	N	N	N	N	Y(121653:121330)	Y(118890:118570)	Y(119454:119134)	Y(119661:119341)	Y(119540:119220)	N	N	N	N	N	N	N	N	N	N	N	Y	Y	Y	N	N	N	Y(119614:119294)	N	N	N	N	N	N	N	N	N	N	N
AcOrf-152	Y(9011:9214)	N	N	Y(5128:6582)	Y(27169:27444)	Y	Y	Y	Y	Y	Y	Y	Y(5131:6585)	Y(5131:6585)	N	N	N	N	N	N	N	N	N	N	N	N	N	N	Y(27231:27479)	N	N	N	N	N	Y	Y(5120:6574)	N	N	N	N	N	N	N	N	N	N	N	N	N
acorf-154	N	N	N	N	N	N	N	N	N	N	N	N	N	N	N	Y(124713:124949)	Y(122023:122256)	Y(122532:122768)	Y(122710:122946)	Y(122673:122906)	N	N	N	N	N	N	N	N	N	N	N	Y(122968:123201)	Y(122546:122779)	Y(121577:121810)	N	N	N	Y(122762:122995)	N	N	N	N	N	N	N	N	N	N	N
acorf-45	N	N	N	N	N	N	N	N	N	N	N	N	N	N	N	Y(32376:32960)	Y(31551:32132)	Y(32378:32962)	Y(32099:32677)	Y(31561:32145)	N	Y(95235:94642)	N	N	N	N	N	N	N	N	N	Y(32594:33175)	Y(32155:32742)	Y(31424:32011)	N	N	N	Y(31861:32445)	N	N	N	N	N	N	N	N	N	N	N
AcOrf-74	N	N	Y(72618:73148)	N	N	N	N	N	N	N	N	N	N	N	Y(62418:61960)	Y(57577:56768)	Y(56747:55941)	Y(57579:56770)	Y(57294:56485)	Y(56772:55966)	N	Y(69532:70215)	N	N	N	N	N	N	N	N	Y(34985:34779)	Y(57756:56953)	Y(57340:56537)	Y(56613:55810)	N	N	Y(63077:62619)	Y(57048:56242)	N	Y(63495:63037)	Y(62924:62466)	Y(62991:62533)	Y(64070:63612)	Y(63886:63428)	N	Y(62646:62173)	N	N	N
AcOrf-85	N	N	Y(65351:65148)	N	N	N	N	N	N	N	N	N	N	N	N	N	N	N	N	N	N	N	Y(64553:64350)	N	N	N	N	N	N	N	N	N	N	N	N	N	N	N	N	N	N	N	N	N	N	N	N	N	N
alk-exo	Y(48552:47365)	Y(34452:35663)	Y(24530:23133)	Y(38726:37509)	Y(95552:96751)	Y(41728:40493)	Y(41156:39921)	Y(48872:47637)	Y(41384:40149)	Y(41769:40534)	Y(41772:40537)	Y(41502:40267)	Y(38655:37438)	Y(33795:32578)	Y(107604:106318)	Y(103629:104888)	Y(102919:104181)	Y(103527:104789)	Y(103509:104771)	Y(103569:104831)	Y(47340:46153)	Y(13200:11815)	Y(25853:24456)	Y(124035:125249)	Y(124418:125632)	Y(123426:124640)	Y(123382:124596)	Y(123968:125182)	Y(95118:96317)	Y(108084:109316)	Y(110480:111673)	Y(103754:105016)	Y(103381:104643)	Y(102415:103677)	Y(156209:154950)	Y(40169:38952)	Y(107834:106548)	Y(103646:104908)	Y(127807:129066)	Y(108422:107136)	Y(107385:106093)	Y(107453:106161)	Y(108967:107681)	Y(108785:107502)	Y(46618:45431)	Y(107388:106102)	Y(106126:107322)	Y(103660:104856)	Y(106435:107631)
arif-1	Y(42364:41492)	N	Y(115356:116330)	Y(32408:31509)	N	Y(35181:34339)	Y(34609:33764)	Y(42325:41480)	Y(34837:33995)	Y(35222:34380)	Y(35225:34383)	Y(34955:34113)	Y(32337:31438)	Y(27477:26578)	Y(125944:125147)	Y(12289:10946)	Y(12317:10974)	Y(12289:10946)	Y(12337:10991)	Y(12322:10979)	Y(41182:40310)	Y(116982:118208)	Y(113981:114955)	Y(143208:142237)	Y(143604:142633)	Y(142604:141633)	Y(142564:141593)	Y(143148:142177)	N	N	N	Y	Y	Y	Y(116232:115432)	Y(33847:32948)	Y(125830:125033)	Y(12284:10968)	N	Y(126875:126078)	Y(125859:125062)	Y(125902:125105)	Y(127417:126620)	Y(127201:126404)	Y(40458:39586)	Y(125384:124587)	N	N	N
br-2	N	N	N	N	N	N	N	N	N	N	N	N	N	N	N	N	N	N	N	N	N	N	N	N	N	N	N	N	N	N	N	N	N	N	N	N	N	N	N	N	N	N	N	N	N	N	N	N	N
bro	Y(20776:21771)	N	Y	Y(63857:62853)	N	Y(17829:16717)	Y(17246:16134)	Y(17264:16152)	Y(17474:16362)	Y(17842:16736)	Y(17857:16751)	Y(17594:16488)	Y(64315:63311)	Y(59455:58451)	Y(49980:51629)	Y(21780:20830)	Y(21820:20870)	Y(21782:20832)	Y(21811:20819)	Y(21868:20876)	Y(19996:21474)	Y(28229:27129)	Y	Y(48823:50376)	Y(49126:50682)	Y(48992:50545)	Y(48798:50351)	Y(48620:50176)	N	Y(93064:94044)	N	Y	Y	Y	Y(142137:143210)	Y(65526:64522)	Y(51258:52316)	Y(21786:21049)	Y	Y(51681:52739)	Y	Y	N	Y(51675:51941)	Y(19472:20467)	N	N	N	N
bv-odv-c42	Y(73678:74775)	Y(32051:30951)	Y(50789:51856)	Y(59318:60469)	Y(59676:60800)	Y(61801:62964)	Y(61109:62272)	Y(68827:69990)	Y(61439:62602)	Y(61711:62874)	Y(61853:63016)	Y(61566:62729)	Y(59776:60927)	Y(54916:56067)	Y(82911:81802)	Y(80870:79782)	Y(80163:79075)	Y(80875:79787)	Y(80707:79616)	Y(81002:79920)	Y(71696:72790)	Y(47916:49046)	Y(50024:50749)	Y(93136:91994)	Y(93532:92390)	Y(93306:92164)	Y(93272:92130)	Y(93083:91941)	Y(59254:60378)	Y(97211:96054)	Y(71989:73110)	Y(81181:80093)	Y(80744:79656)	Y(79841:78753)	Y(101484:100339)	Y(60987:62138)	Y(83587:82478)	Y(80928:79837)	Y(88154:87012)	Y(84023:82914)	Y(83428:82319)	Y(83496:82387)	Y(84576:83467)	Y(84386:83277)	Y(73324:74418)	Y(83141:82032)	Y(66968:68110)	Y(64275:65417)	Y(67094:68236)
calyx	N	N	N	N	N	Y(46372:45368)	Y(45801:44797)	Y(53517:52513)	Y(46032:45025)	Y(46412:45408)	N	Y(46146:45142)	N	N	N	N	N	N	N	N	N	N	N	Y(118617:119612)	Y(118999:119994)	Y(118007:119002)	Y(117963:118958)	Y(118550:119545)	N	N	N	N	N	N	N	N	N	N	N	N	N	N	N	N	N	N	N	N	N
calyx-pep	N	N	Y(25957:25088)	N	Y(15587:16024)	N	N	N	N	N	Y(46418:45411)	N	N	N	N	N	N	N	N	N	N	Y(15170:14289)	Y(27277:26408)	N	N	N	N	N	Y(15584:16021)	N	Y(16367:16807)	N	N	N	Y(133639:134580)	N	N	N	N	N	N	N	N	N	N	N	Y(18059:18517)	Y(17954:18412)	Y(17970:18428)
CALYXPEP	N	N	N	Y(44398:43400)	N	N	N	N	N	N	N	N	Y(44327:43329)	Y(39467:38469)	Y(113379:114401)	N	N	N	N	N	N	N	N	N	N	N	N	N	N	Y(121518:122510)	Y(73143:73328)	N	N	N	N	Y(45849:44851)	Y(113313:114335)	N	Y(105578:104559)	Y(114305:115327)	Y(113290:114312)	Y(113333:114355)	Y(114849:115871)	Y(114660:115676)	N	Y(112867:113889)	N	N	N
cg3-2	N	N	N	N	N	N	N	N	N	N	N	N	N	N	N	N	N	N	N	N	N	N	N	N	N	N	N	N	N	N	Y(108368:108144)	N	N	N	N	N	N	N	N	N	N	N	N	N	N	N	N	N	N
cg30	N	N	N	N	N	Y(12235:11885)	Y(11652:11302)	Y(11670:11320)	Y(11877:11527)	Y(12260:11907)	Y(12263:11910)	Y(12003:11653)	N	N	N	N	N	N	N	N	N	N	N	N	N	N	N	N	N	N	N	N	N	N	N	N	N	N	Y(8570:9388)	N	N	N	N	N	N	N	N	N	N
chab	Y(118327:118791)	N	Y(85702:86172)	Y(97073:97651)	N	Y(99630:100214)	Y(98937:99521)	Y(106676:107260)	Y(99262:99849)	Y(99521:100108)	Y(99692:100279)	Y(99371:99952)	Y(97622:98200)	Y(92762:93340)	Y(42923:42441)	Y(43346:42831)	Y(42500:41985)	Y(43348:42833)	Y(43038:42523)	Y(42514:41999)	Y(116335:116859)	Y(84989:85552)	Y(84879:85349)	Y(44812:44303)	Y(45081:44572)	Y(44981:44472)	Y(44762:44253)	Y(44575:44066)	N	Y(56405:55812)	Y(81207:80962)	Y(43508:42993)	Y(43092:42577)	Y(42367:41852)	Y(56563:55988)	Y(98730:99308)	Y(43062:42595)	Y(42794:42279)	Y(44800:44279)	Y(42728:42258)	Y(42570:42109)	Y(42637:42176)	Y(42904:42440)	Y(42729:42265)	Y(117923:118432)	Y(42616:42149)	N	N	N
chab2	Y(118040:118312)	N	Y(85479:85730)	Y(96784:97056)	N	Y(99350:99616)	Y(98657:98923)	Y(106396:106662)	Y(98982:99248)	Y(99241:99507)	Y(99412:99678)	Y(99091:99357)	Y(97333:97605)	Y(92473:92745)	Y(43201:42935)	Y(43609:43358)	Y(42763:42512)	Y(43611:43360)	Y(43298:43050)	Y(42777:42526)	Y(116082:116357)	Y(84692:84964)	Y(84653:84907)	Y(45108:44833)	Y(45377:45102)	Y(45277:45002)	Y(45058:44783)	Y(44871:44596)	N	N	N	Y(43768:43520)	Y(43352:43104)	Y(42627:42379)	Y(57110:56814)	Y(98447:98713)	Y(43340:43074)	Y(43054:42806)	Y(45145:44876)	Y(43006:42740)	Y(42848:42582)	Y(42915:42649)	Y(43182:42916)	Y(43007:42741)	Y(117670:117945)	Y(42894:42628)	N	N	N
chitinase	Y(20592:18904)	N	Y(29724:31382)	Y(20017:21711)	Y(7474:5714)	Y(21112:22833)	Y(20529:22250)	Y(28248:29969)	Y(20756:22477)	Y(21124:22845)	Y(21140:22861)	Y(20877:22598)	Y(19964:21658)	Y(19964:21658)	Y(37480:35711)	Y(98112:96457)	Y(97426:95768)	Y(98042:96387)	Y(98017:96359)	Y(98079:96421)	Y(19806:18118)	Y(110335:112011)	N	Y(61583:63301)	Y(61877:63595)	Y(61752:63470)	Y(61555:63273)	Y(61388:63106)	Y(7471:5711)	Y(64295:62601)	Y(29756:31513)	Y(98269:96611)	Y(97909:96254)	Y(96930:95272)	Y(65775:64099)	Y(19971:21692)	Y(37164:35437)	Y(98160:96502)	Y(55037:53319)	Y(37258:35531)	Y(37116:35389)	Y(37183:35456)	Y(37446:35719)	Y(37264:35537)	Y(19281:17593)	Y(37145:35418)	Y(7839:6055)	Y(7788:6004)	Y(7811:6027)
chtb1	Y(147877:147599)	Y(62320:62652)	Y(11341:11054)	Y(126485:126207)	Y(5298:4993)	Y(129377:129099)	Y(128697:128419)	Y(136433:136155)	Y(129029:128751)	Y(129281:129003)	Y(129454:129176)	Y(129131:128853)	Y(126909:126631)	Y(121989:121711)	Y(10381:10659)	Y(117354:117641)	Y(114618:114905)	Y(115212:115499)	Y(115437:115724)	Y(115268:115555)	Y(148646:148368)	Y(2917:2630)	Y(11561:11274)	Y(15612:15893)	Y(15888:16169)	Y(15780:16061)	Y(15569:15850)	Y(15384:15665)	Y(5295:4990)	N	Y(9426:9127)	Y(115536:115823)	Y(115170:115457)	Y(114198:114485)	Y(18198:17920)	Y(128155:127877)	Y(10417:10695)	Y(115342:115629)	Y(22336:22614)	Y(10395:10673)	Y(10343:10621)	Y(10350:10628)	Y(10360:10638)	Y(10359:10637)	Y(148086:147808)	Y(10348:10677)	Y(5915:5610)	Y(5863:5558)	Y(5886:5581)
chtb2	N	N	Y(40756:40478)	N	N	N	N	N	N	N	N	N	N	N	N	Y(121619:121918)	Y(118859:119206)	Y(119423:119764)	Y(119630:119947)	Y(119509:119856)	Y(38413:38853)	Y(140541:140191)	N	N	N	N	N	N	N	Y	Y(123211:123396)	Y	Y	Y	Y(31311:31595)	N	N	Y(119583:119930)	Y(58752:58435)	N	N	N	N	N	N	N	N	N	N
conotoxin	Y(97102:96950)	N	Y(123595:123434)	N	N	N	N	N	N	N	N	N	N	N	N	N	N	N	N	N	Y(95124:94972)	Y(130516:130677)	Y(122399:122238)	Y(72842:72991)	Y(73247:73396)	Y(73013:73162)	Y(72976:73125)	Y(72779:72928)	N	N	N	N	N	N	Y(146723:146884)	N	N	N	N	N	N	N	N	N	Y(96739:96587)	N	N	N	N
contoxin-like	N	Y(68963:69592)	N	N	N	N	N	N	N	N	N	N	N	N	N	N	N	N	N	N	N	N	N	N	N	N	N	N	N	N	N	N	N	N	N	N	N	N	N	N	N	N	N	N	N	N	N	N	N
desmoplakin	Y(104467:102245)	Y(9554:11638)	Y(79064:76587)	Y(87422:85284)	Y(83478:85766)	Y(90323:88209)	Y(89631:87517)	Y(97370:95256)	Y(89930:87816)	Y(90192:88078)	Y(90364:88250)	Y(90042:87928)	Y(87964:85826)	Y(83104:80966)	Y(58790:56433)	Y(50567:52975)	Y(49730:52147)	Y(50569:52977)	Y(50255:52672)	Y(49758:52172)	Y(102562:100301)	Y(76309:73952)	Y(78275:75810)	Y(54489:56642)	Y(54795:56951)	Y(54658:56811)	Y(54464:56617)	Y(54289:56445)	Y(83106:85331)	Y(72182:69576)	Y(98191:100398)	Y(50745:53159)	Y(50329:52743)	Y(49601:52015)	Y(78554:76233)	Y(89103:86965)	Y(59449:57092)	Y(50031:52448)	Y(64043:61434)	Y(59872:57515)	Y(59295:56938)	Y(59362:57005)	Y(60433:58076)	Y(60255:57898)	Y(104157:101896)	Y(59003:56646)	Y(93640:95793)	Y(91178:92908)	Y(93946:96102)
dna-binding	Y(139739:140725)	Y(4268:3558)	Y(102084:101182)	Y(117088:118083)	Y(57249:56404)	Y(120837:121823)	Y(120165:121151)	Y(127901:128887)	Y(120477:121463)	Y(120731:121717)	Y(120903:121889)	Y(120585:121571)	Y(117454:118446)	Y(112594:113586)	Y(21397:20426)	Y(17130:16177)	Y(17158:16205)	Y(17130:16177)	Y(17179:16226)	Y(17163:16210)	Y(140547:141527)	Y(108245:109207)	Y(100944:100042)	Y(24140:23157)	Y(24409:23426)	Y(24308:23325)	Y(24090:23107)	Y(23905:22922)	Y(56827:55982)	Y(40470:41417)	Y(69410:68520)	Y(17152:16199)	Y(17136:16183)	Y(17140:16187)	Y(42642:43568)	Y(118752:119747)	Y(21421:20450)	Y(17129:16176)	Y(29783:30712)	Y(21404:20433)	Y(21359:20388)	Y(21363:20395)	Y(21369:20398)	Y(21370:20399)	Y(139993:140973)	Y(21403:20432)	Y(64439:63567)	Y(61746:60874)	Y(64565:63693)
dna-ligase	N	N	N	N	Y(92997:91291)	N	N	N	N	N	N	N	N	N	N	N	N	N	N	N	N	N	N	N	N	N	N	N	Y(92562:90856)	N	Y(107751:106054)	N	N	N	Y(21991:23640)	N	N	N	Y(48547:50361)	N	N	N	N	N	N	N	Y(103410:101698)	Y(100947:99772)	Y(103719:102007)
dna-photolyase	N	N	N	N	N	N	N	N	N	N	N	N	N	N	N	N	N	N	N	N	N	N	N	Y(65291:66829)	Y(65586:67124)	Y(65462:67000)	Y(65265:66803)	Y(65099:66637)	N	N	N	N	N	N	N	N	N	N	Y(134303:135796)	N	N	N	N	N	N	N	N	N	N
dnapol	Y(104466:107462)	Y(9555:6796)	Y(79074:81944)	Y(87424:90546)	Y(83542:80405)	Y(90325:93522)	Y(89633:92830)	Y(97372:100569)	Y(89932:93132)	Y(90194:93391)	Y(90366:93563)	Y(90044:93241)	Y(87966:91088)	Y(83106:86228)	Y(58821:61883)	Y(50558:47595)	Y(49721:46755)	Y(50560:47597)	Y(50246:47280)	Y(49749:46780)	Y(102561:105563)	Y(76321:79380)	Y(78285:81155)	Y(54487:51341)	Y(54793:51647)	Y(54656:51510)	Y(54462:51316)	Y(54287:51141)	Y(83107:79967)	Y(72454:75378)	Y(98189:94752)	Y(50736:47770)	Y(50320:47354)	Y(49592:46626)	Y(78436:81468)	Y(89105:92227)	Y(59480:62542)	Y(50022:47203)	Y(64042:67248)	Y(59906:62968)	Y(59335:62397)	Y(59402:62464)	Y(60473:63535)	Y(60289:63351)	Y(104156:107158)	Y(59034:62096)	Y(93698:90543)	Y(91236:88081)	Y(94004:90849)
dUTPase	N	N	N	Y(50434:50808)	N	N	N	N	N	N	N	N	N	N	N	N	N	N	N	N	N	N	N	N	N	N	Y(117698:117198)	N	N	Y(127051:128118)	N	N	N	N	N	N	N	N	Y(96753:97811)	N	N	N	N	N	N	N	Y(12877:12248)	Y(12717:12124)	Y(12735:12145)
dutpase	Y(63892:64320)	N	N	N	N	Y(53269:53700)	Y(52577:53008)	Y(60295:60726)	Y(52915:53346)	Y(53192:53623)	Y(53313:53744)	Y(53041:53472)	Y(50511:50945)	Y(45651:46085)	N	N	N	N	N	N	Y(61937:62365)	N	N	Y(118352:117852)	Y(118724:118224)	Y(117742:117242)	Y(47741:47977)	Y(118275:117775)	N	N	Y(14605:14027)	N	N	N	Y(114263:114712)	Y(52034:52468)	N	N	N	N	N	N	N	N	Y(61586:61930)	N	N	N	N
egt	Y(34025:35575)	N	Y(119657:119259)	Y(24133:25710)	Y(107364:105958)	Y(26897:28468)	Y(26313:27884)	Y(34033:35604)	Y(26541:28112)	Y(26929:28500)	Y(26943:28514)	Y(26662:28233)	Y(24056:25633)	N	Y(118165:119712)	Y(6375:7895)	Y(6407:7927)	Y(6375:7895)	Y(6415:7935)	Y(6404:7924)	Y(32869:34419)	Y(123545:122037)	Y(118212:117949)	Y(135159:136718)	Y(135549:137108)	Y(134550:136109)	Y(134509:136068)	Y(135098:136657)	Y(107528:106140)	Y(10123:8558)	Y(126139:124751)	Y(6418:7938)	Y(6407:7927)	Y(6407:7927)	Y(121402:123087)	Y(25569:27146)	Y(118114:119661)	Y(6397:7917)	Y(123353:121812)	Y(119103:120650)	Y(118087:119634)	Y(118130:119677)	Y(119645:121192)	Y(119450:120997)	Y(32102:33688)	Y(117668:119215)	Y(122000:120546)	Y(119603:118167)	Y(122336:120882)
endonuclease	Y(17060:16782)	N	Y(70219:70515)	N	N	N	N	N	N	N	N	N	N	N	N	Y(60088:59774)	Y(59252:58938)	Y(60090:59776)	Y(59793:59479)	Y(59277:58963)	Y(16527:16231)	Y(66740:67042)	Y(69439:69735)	N	N	N	N	N	N	N	N	Y(60270:59956)	Y(59851:59537)	Y(59127:58813)	N	N	N	Y(59553:59239)	Y(94403:94762)	N	N	N	N	N	Y(16007:15711)	N	Y(53704:53465)	N	Y(53683:53444)
enhancin-4	N	N	N	N	Y(50717:50565)	N	N	N	N	N	N	N	N	Y(50467:50123)	N	N	N	N	N	N	N	N	N	N	N	N	N	N	N	N	N	N	N	N	N	N	N	N	N	N	N	N	N	N	N	N	N	N	N
EP32	N	N	N	N	N	N	N	N	N	N	N	N	N	N	N	N	N	N	N	N	N	N	N	N	N	N	N	N	N	Y	N	N	N	N	N	N	N	N	N	N	N	N	N	N	N	N	N	N	N
etm	N	N	Y(94070:94402)	N	Y(101528:101863)	N	N	N	N	N	N	N	N	N	N	N	N	N	N	N	N	N	N	N	N	N	N	N	Y(101708:102043)	N	Y(118188:118658)	N	N	N	N	N	N	N	N	N	N	N	N	N	N	N	Y(115597:115992)	Y(113177:113575)	Y(115907:116302)
ets	Y(35749:36282)	N	Y(94431:94700)	Y(25897:26421)	N	Y(28688:29260)	Y(28104:28676)	Y(35824:36270)	Y(28332:28904)	Y(28720:29292)	Y(28734:29306)	Y(28453:29025)	Y(25820:26344)	N	N	Y(35475:35167)	Y(34611:34342)	Y(35477:35169)	Y(35155:34886)	Y(34624:34355)	Y(34588:35124)	Y(94164:94463)	N	Y(136921:137466)	Y(137312:137857)	Y(136312:136857)	Y(136272:136817)	Y(136861:137406)	N	Y(8354:7536)	N	Y(35634:35365)	Y(35218:34949)	Y(34487:34218)	Y(123306:123878)	Y(27333:27857)	N	Y(34923:34654)	Y(121600:120959)	N	N	N	N	N	Y(33857:34393)	N	N	N	N
exo-iii-v-trex	N	N	Y(32200:32892)	N	N	N	N	N	N	N	N	N	N	N	N	Y(96408:95728)	Y(95778:95095)	Y(96397:95714)	Y(96369:95686)	Y(96431:95748)	N	Y(18201:18959)	Y(30860:31717)	N	N	N	N	N	N	N	N	Y(96621:95938)	Y(96264:95584)	Y(95282:94599)	N	N	N	Y(96512:95832)	N	N	N	N	N	N	N	N	N	N	N
f-protein	Y(9376:11418)	N	Y(114000:112036)	Y(11248:13356)	Y(20277:22067)	Y(12475:14484)	Y(11892:13901)	Y(11910:13919)	Y(12117:14126)	Y(12500:14509)	Y(12503:14512)	Y(12243:14252)	Y(11203:13311)	Y(11203:13311)	Y(129430:127397)	Y(13577:15598)	Y(13605:15626)	Y(13577:15598)	Y(13625:15646)	Y(13571:15631)	Y(9536:11572)	Y(115719:113509)	Y(112623:110659)	Y(146715:144730)	Y(147111:145126)	Y(146111:144126)	Y(146071:144086)	Y(146655:144670)	Y(20297:22066)	Y(3684:1654)	Y(23511:25307)	Y(13595:15619)	Y(13583:15604)	Y(13583:15607)	Y(127495:129522)	Y(11208:13316)	Y(129317:127284)	Y(13572:15596)	Y(116945:114888)	Y(130362:128329)	Y(129346:127313)	Y(129389:127356)	Y(130905:128872)	Y(130689:128656)	Y(9559:11595)	Y(128870:127269)	Y(25088:26881)	Y(25086:26915)	Y(25306:27099)
fgf	Y(46380:45259)	N	Y(109144:108587)	Y(36512:35370)	Y(105091:105945)	Y(39429:38212)	Y(38857:37640)	Y(46573:45356)	Y(39085:37868)	Y(39470:38253)	Y(39473:38256)	Y(39203:37986)	Y(36441:35299)	Y(31581:30439)	Y(106190:105285)	Y(23561:24109)	Y(22740:23288)	Y(23563:24111)	Y(23385:23933)	Y(22627:23175)	Y(45172:44078)	Y(104311:104889)	Y(107767:107210)	Y(126298:127518)	Y(126681:127904)	Y(125689:126909)	Y(125645:126868)	Y(126231:127454)	Y(105297:106127)	Y(110655:111920)	Y(123820:124734)	Y(23677:24225)	Y(23344:23892)	Y(22622:23170)	Y(154917:154060)	Y(37951:36809)	Y(106421:105516)	Y(22931:23479)	Y(130158:131180)	Y(107013:106108)	Y(105970:105065)	Y(106038:105133)	Y(107560:106655)	Y(107375:106470)	Y(44448:43354)	Y(105975:105070)	Y(119446:120489)	Y(117041:118084)	Y(119756:120799)
fp25	Y(114260:114847)	N	Y(84662:85291)	Y(93799:94386)	Y(90204:90656)	Y(96305:96892)	Y(95612:96199)	Y(103351:103938)	Y(95917:96504)	Y(96176:96763)	Y(96347:96934)	Y(96026:96613)	Y(94339:94926)	Y(89479:90066)	Y(44066:43413)	Y(44402:43758)	Y(43560:42916)	Y(44404:43760)	Y(44089:43445)	Y(43574:42930)	Y(112320:112907)	Y(83906:84544)	Y(83867:84496)	Y(46080:45385)	Y(46349:45654)	Y(46249:45554)	Y(46030:45335)	Y(45843:45148)	Y(89769:90221)	Y(57664:56957)	Y(104734:105180)	Y(44563:43919)	Y(44147:43503)	Y(43422:42778)	Y(57888:57226)	Y(95480:96067)	Y(44205:43552)	Y(43850:43206)	Y(46549:45905)	Y(43871:43218)	Y(43713:43060)	Y(43780:43127)	Y(44047:43394)	Y(43872:43219)	Y(113907:114494)	Y(43816:43106)	Y(100580:101065)	Y(98097:98582)	Y(100870:101355)
gp16	Y(12813:12526)	N	Y(26313:26005)	Y(13765:13475)	N	Y(14890:14606)	Y(14307:14023)	Y(14325:14041)	Y(14532:14248)	Y(14915:14631)	Y(14918:14634)	Y(14658:14374)	Y(13720:13430)	Y(13720:13430)	Y(113037:113327)	Y(101583:101903)	Y(100897:101217)	Y(101508:101828)	Y(101487:101807)	Y(101550:101870)	Y(12984:12697)	Y(15619:15335)	Y(27633:27325)	Y(130137:129850)	Y(130523:130236)	Y(129528:129241)	Y(129488:129201)	Y(130073:129786)	N	Y(114181:113885)	N	Y(101738:102058)	Y(101365:101685)	Y(100399:100719)	N	Y(13727:13437)	Y(112977:113261)	Y(101630:101950)	N	Y(113969:114253)	Y(112954:113238)	Y(112997:113281)	Y(114513:114797)	Y(114324:114608)	Y(13008:12721)	Y(112531:112815)	N	N	N
gp37	Y(32637:33425)	N	Y(82004:83098)	Y(22755:23537)	Y(9578:8856)	Y(25484:26284)	Y(24900:25700)	Y(32620:33420)	Y(25128:25928)	Y(25516:26316)	Y(25530:26330)	Y(25249:26049)	Y(22660:23460)	N	Y(48829:47990)	Y(47465:46581)	Y(46625:45741)	Y(47467:46583)	Y(47150:46266)	Y(46638:45754)	Y(31481:32269)	Y	Y(81215:82303)	Y(64329:65144)	Y(64625:65440)	Y(64500:65315)	Y(64303:65118)	Y(64137:64952)	Y(9575:8853)	Y(62515:61682)	N	Y(47628:46744)	Y(47212:46328)	Y(46484:45600)	Y(63690:62881)	Y(24185:24973)	Y(48972:48133)	Y(46913:46029)	Y(52391:51534)	Y(48629:47790)	Y(48472:47633)	Y(48539:47700)	Y(48806:47967)	Y(48631:47792)	Y(30750:31538)	Y(48526:47687)	Y(10103:9348)	Y(10049:9294)	Y(10073:9318)
gp41	Y(94467:95468)	Y(43315:42650)	Y(69131:70219)	Y(78122:79120)	Y(77290:78150)	Y(79486:80493)	Y(78794:79801)	Y(86536:87543)	Y(79099:80106)	Y(79377:80384)	Y(79531:80538)	Y(79246:80253)	Y(78589:79587)	Y(73729:74727)	Y(65797:64829)	Y(61302:60091)	Y(60466:59255)	Y(61304:60093)	Y(61001:59796)	Y(60491:59280)	Y(92495:93496)	Y(65484:66713)	Y(68351:69439)	Y(76237:75281)	Y(76643:75687)	Y(76408:75452)	Y(76371:75415)	Y(76176:75220)	Y(76854:77714)	Y(78809:77793)	Y(90988:91917)	Y(61484:60273)	Y(61065:59854)	Y(60341:59130)	Y(84789:83818)	Y(79799:80797)	Y(66456:65488)	Y(60767:59556)	Y(70963:69758)	Y(66880:65912)	Y(66306:65338)	Y(66373:65405)	Y(67452:66484)	Y(67268:66300)	Y(94110:95111)	Y(66010:65042)	Y(85808:86677)	Y(83326:84195)	Y(86110:86979)
gp64	N	N	Y(27115:28644)	N	N	N	N	N	N	N	N	N	N	N	N	Y(100839:99244)	Y(100155:98563)	Y(100766:99177)	Y(100745:99153)	Y(100808:99216)	N	Y(16486:18024)	Y(28657:30186)	N	N	N	N	N	N	N	N	Y(100996:99404)	Y(100623:99031)	Y(99657:98065)	N	N	N	Y(100888:99296)	N	N	N	N	N	N	N	N	N	N	N
gta	N	N	Y(98947:97460)	N	N	N	N	N	N	N	N	N	N	N	N	Y(30228:31748)	Y(29403:30923)	Y(30230:31750)	Y(29951:31471)	Y(29413:30933)	N	N	Y(97807:96320)	N	N	N	N	N	N	N	N	Y(30446:31966)	Y(30007:31527)	Y(29276:30796)	N	N	N	Y(29713:31233)	N	N	N	N	N	N	N	N	N	N	N
he65	N	N	N	N	N	N	N	N	N	N	N	N	N	N	N	N	N	N	N	N	Y(28274:26520)	N	N	N	N	N	N	N	N	N	N	N	N	N	N	N	N	N	N	N	N	N	N	N	Y(27541:25787)	N	N	N	N
HE65A	N	N	N	N	N	N	N	N	N	N	N	N	N	N	N	N	N	N	N	N	N	N	N	N	N	N	N	N	N	N	N	N	N	N	N	N	N	N	N	N	N	N	N	N	N	N	N	N	N
helicase	Y(81374:85012)	Y(54804:58214)	Y(55389:59027)	Y(64887:68573)	Y(63146:66547)	Y(65964:69632)	Y(65272:68940)	Y(72991:76659)	Y(65603:69271)	Y(65874:69542)	Y(66017:69685)	Y(65730:69398)	Y(65345:69031)	Y(60485:64171)	Y(79069:75308)	Y(76092:72424)	Y(75405:71737)	Y(76097:72429)	Y(75937:72269)	Y(75446:71778)	Y(79394:83023)	Y(51557:55309)	Y(54625:58263)	Y(88241:84597)	Y(88643:84999)	Y(88412:84768)	Y(88383:84739)	Y(88194:84550)	Y(62724:66125)	Y(92479:88724)	Y(75437:78907)	Y(76424:72756)	Y(75965:72297)	Y(75085:71417)	Y(97643:93975)	Y(66556:70242)	Y(79745:75984)	Y(75382:71714)	Y(84505:80777)	Y(80159:76398)	Y(79587:75826)	Y(79654:75893)	Y(80734:76973)	Y(80544:76783)	Y(81010:84639)	Y(79299:75538)	Y(70612:74007)	Y(67924:71313)	Y(70738:74133)
hoar	Y(5253:3085)	N	N	N	Y(17994:19283)	N	N	N	N	N	N	N	N	N	Y(5181:2920)	N	N	N	N	N	Y(5453:3207)	N	N	Y(6601:2966)	Y(6864:2965)	Y(6769:2966)	Y(6504:2965)	Y(6360:2965)	Y(17993:19282)	Y(21409:18920)	Y(20650:22008)	N	N	N	Y(8554:4619)	N	Y(5210:2922)	N	Y(5259:3313)	Y(5201:2922)	Y(5168:2916)	Y(5174:2922)	Y(5162:2922)	Y(5162:2922)	Y(5475:3250)	Y(5255:2922)	Y(22505:23875)	Y(22582:23952)	Y(22688:24058)
hrf-1	N	N	N	N	N	N	N	N	N	N	N	N	N	N	N	N	N	N	N	N	N	N	N	N	N	N	N	N	N	N	N	N	N	N	Y(62018:62674)	N	N	N	N	N	N	N	N	N	N	N	N	N	N
hypothetical-protein-100	N	N	N	N	N	N	N	N	N	N	N	N	N	N	N	N	N	N	N	N	N	N	N	Y(101975:102568)	Y(102351:102944)	Y(102144:102737)	Y(102084:102677)	Y(101902:102495)	N	N	N	N	N	N	N	N	N	N	N	N	N	N	N	N	N	N	N	N	N
hypothetical-protein-101	N	N	N	N	N	N	N	N	N	N	N	N	N	N	N	N	N	N	N	N	N	N	N	Y(7804:9165)	Y(8065:9447)	Y(7972:9333)	Y(7702:9123)	Y(7561:8943)	N	N	N	N	N	N	N	N	N	N	N	N	N	N	N	N	N	N	N	N	N
hypothetical-protein-102	N	N	N	N	N	N	N	N	N	N	N	N	N	N	N	N	N	N	N	N	N	N	N	Y(24735:26009)	Y(25004:26278)	Y(24903:26177)	Y(24685:25959)	Y(24500:25774)	N	N	N	N	N	N	N	N	N	N	N	N	N	N	N	N	N	N	N	N	N
hypothetical-protein-103	N	N	Y	N	N	N	N	N	N	N	N	N	N	N	N	N	N	N	N	N	N	N	N	N	N	N	N	N	N	N	N	N	N	N	N	N	N	N	N	N	N	N	N	N	N	N	N	N	N
hypothetical-protein-104	N	N	N	N	N	N	N	N	N	N	N	N	N	N	N	N	N	N	N	N	N	N	N	N	N	N	N	N	N	N	N	N	N	N	Y(148558:149121)	N	N	N	N	N	N	N	N	N	N	N	N	N	N
hypothetical-protein-105	N	N	N	N	N	N	N	N	N	N	N	N	N	N	N	N	N	N	N	N	N	N	N	Y(104264:103854)	Y(104641:104231)	Y(104433:104023)	Y(104367:103957)	Y(104192:103782)	N	N	N	N	N	N	N	N	N	N	N	N	N	N	N	N	N	N	N	N	N
hypothetical-protein-106	N	N	N	N	N	N	N	N	N	N	N	N	N	N	N	N	N	N	N	N	N	N	N	N	N	N	N	N	N	N	N	N	N	N	N	N	N	N	N	N	N	N	N	N	N	N	N	N	N
hypothetical-protein-107	N	N	N	N	N	N	N	N	N	N	N	N	N	N	N	N	N	N	N	N	N	Y	N	Y(34131:33262)	Y(34403:33564)	Y(34300:33431)	Y(34084:33242)	Y(33896:33060)	N	Y	N	N	N	N	N	N	N	N	N	N	N	N	N	N	N	N	N	N	N
hypothetical-protein-108	N	N	N	N	N	N	N	N	N	N	N	N	N	N	N	N	N	N	N	N	N	N	N	N	N	N	N	N	N	N	N	N	N	N	Y(25947:26411)	N	N	N	N	N	N	N	N	N	N	N	N	N	N
hypothetical-protein-109	N	N	N	N	N	N	N	N	N	N	N	N	N	N	N	N	N	N	N	N	N	N	N	N	N	N	N	N	N	N	N	N	N	N	Y(162067:163050)	N	N	N	N	N	N	N	N	N	N	N	N	N	N
hypothetical-protein-111	N	N	N	N	N	N	N	N	N	N	N	N	N	N	N	N	N	N	N	N	N	N	N	N	N	N	N	N	N	N	N	N	N	N	Y(12816:13364)	N	N	N	N	N	N	N	N	N	N	N	N	N	N
hypothetical-protein-112	N	N	N	N	N	N	N	N	N	N	N	N	N	N	N	N	N	N	N	N	N	N	N	N	N	N	N	N	N	N	N	N	N	N	Y(11650:12423)	N	N	N	N	N	N	N	N	N	N	N	N	N	N
hypothetical-protein-113	N	N	N	N	N	N	N	N	N	N	N	N	N	N	N	N	N	N	N	N	N	Y	N	N	N	N	N	N	N	N	N	N	N	N	N	N	N	N	N	N	N	N	N	N	N	N	N	N	N
hypothetical-protein-114	N	N	N	N	N	N	N	N	N	N	N	N	N	N	N	N	N	N	N	N	N	N	N	N	N	N	N	N	N	N	N	N	N	N	N	N	N	N	N	N	N	N	N	N	N	N	N	N	N
hypothetical-protein-115	N	N	Y	N	N	N	N	N	N	N	N	N	N	N	N	N	N	N	N	N	N	N	Y	N	N	N	N	N	N	N	N	N	N	N	N	N	N	N	N	N	N	N	N	N	N	N	N	N	N
hypothetical-protein-116	N	N	N	N	N	N	N	N	N	N	N	N	N	N	N	N	N	N	N	N	N	N	N	N	N	N	N	N	N	N	N	N	N	N	N	N	N	N	N	N	N	N	N	N	N	N	N	N	N
hypothetical-protein-117	N	N	N	N	N	N	N	N	N	N	N	N	N	N	N	N	N	N	N	N	N	N	N	N	N	N	N	N	N	N	N	N	N	N	N	N	N	N	N	N	N	N	N	N	N	N	N	N	N
hypothetical-protein-118	N	N	N	N	N	N	N	N	N	N	N	N	N	N	N	N	N	N	N	N	N	N	Y	N	N	N	N	N	N	N	N	N	N	N	Y(35057:34257)	N	N	N	N	N	N	N	N	N	N	N	N	N	N
hypothetical-protein-119	N	N	N	N	N	N	N	N	N	N	N	N	N	N	N	N	N	N	N	N	N	N	N	N	N	N	N	N	N	N	N	N	N	N	Y(28937:30019)	N	N	N	N	N	N	N	N	N	N	N	N	N	N
hypothetical-protein-120	N	N	N	N	N	N	N	N	N	N	N	N	N	N	N	N	N	N	N	N	N	N	N	N	N	N	N	N	N	N	N	N	N	N	Y(25774:25148)	N	N	N	N	N	N	N	N	N	N	N	N	N	N
hypothetical-protein-122	N	N	N	N	N	N	N	N	N	N	N	N	N	N	N	N	N	N	N	N	N	N	N	N	N	N	N	N	N	N	N	N	N	N	N	N	N	N	N	N	N	N	N	N	N	N	N	N	N
hypothetical-protein-123	N	N	N	N	N	N	N	N	N	N	N	N	N	N	N	N	N	N	N	N	N	N	N	N	N	N	N	N	N	N	N	N	N	N	Y	N	N	N	N	N	N	N	N	N	N	N	N	N	N
hypothetical-protein-126	N	N	N	N	N	N	N	N	N	N	N	N	N	N	Y	N	N	N	N	N	N	N	N	N	N	N	N	N	N	N	N	N	N	N	N	N	Y(23968:24120)	N	N	N	N	N	N	N	N	Y(23950:24102)	N	N	N
hypothetical-protein-128	N	N	N	N	N	N	N	N	N	N	N	N	N	N	N	N	N	N	N	N	N	N	N	N	N	N	N	N	N	N	N	N	N	N	N	N	Y(52978:52799)	N	N	N	N	N	N	N	N	Y(52532:52353)	N	N	N
hypothetical-protein-129	N	N	N	N	N	N	N	N	N	N	N	N	N	N	N	N	N	N	N	N	N	N	N	N	N	N	N	N	N	N	N	N	N	N	N	N	N	N	N	N	N	N	N	N	N	N	Y(54413:54150)	Y(51665:51402)	Y(54397:54134)
hypothetical-protein-130	N	N	N	N	N	N	N	N	N	N	N	N	N	N	N	N	N	N	N	N	N	N	N	N	N	N	N	N	N	N	N	N	N	N	N	N	N	N	N	N	N	N	N	N	N	N	N	N	N
hypothetical-protein-131	N	N	N	N	N	N	N	N	N	N	N	N	N	N	N	N	N	N	N	N	N	N	N	N	N	N	N	N	N	N	N	N	N	N	Y(123276:123109)	N	N	N	N	N	N	N	N	N	N	N	N	N	N
hypothetical-protein-132	N	N	N	N	N	N	N	N	N	N	N	N	N	N	N	N	N	N	N	N	N	N	N	N	N	N	N	N	N	N	N	N	N	N	Y(55521:55360)	N	Y	N	N	Y	Y	Y	Y	Y	N	Y	N	N	N
hypothetical-protein-133	N	N	N	N	N	N	N	N	N	N	N	N	N	N	N	N	N	N	N	N	N	N	N	N	N	N	N	N	N	N	N	N	N	N	N	N	N	N	N	N	N	N	N	N	N	N	Y(36091:35468)	Y(36110:35487)	Y(36255:35632)
hypothetical-protein-135	N	N	N	N	N	N	N	N	N	N	N	N	N	N	N	N	N	N	N	N	N	N	N	N	N	N	N	N	N	N	N	N	N	N	N	N	N	N	N	N	N	N	N	N	N	N	Y(119345:119025)	Y(116940:116620)	Y(119655:119335)
hypothetical-protein-136	N	N	N	N	Y(22241:23269)	N	N	N	N	N	N	N	N	N	N	N	N	N	N	N	N	N	N	N	N	N	N	N	Y(22240:23268)	N	N	N	N	N	N	N	N	N	N	N	N	N	N	N	N	N	Y(27107:28474)	Y(27148:28491)	Y(27325:28665)
hypothetical-protein-138	N	N	N	N	N	N	N	N	N	N	N	N	N	N	N	N	N	N	N	N	N	N	N	N	N	N	N	N	N	N	N	N	N	N	N	N	N	N	N	N	N	N	N	N	N	N	N	N	N
hypothetical-protein-140	N	N	N	N	N	N	N	N	N	N	N	N	N	N	N	N	N	N	N	N	N	N	N	N	N	N	N	N	N	N	N	N	N	N	N	N	N	N	N	N	N	N	N	N	N	N	N	N	N
hypothetical-protein-141	N	N	N	N	N	N	N	N	N	N	N	N	N	N	N	N	N	N	N	N	N	N	N	N	N	N	N	N	N	N	N	N	N	N	N	N	N	N	N	N	N	N	N	N	N	N	N	N	N
hypothetical-protein-142	N	N	N	N	Y(104824:105042)	N	N	N	N	N	N	N	N	N	N	N	N	N	N	N	N	N	Y	N	N	N	N	N	Y(105003:105221)	N	Y(123393:123770)	N	N	N	N	N	N	N	N	N	N	N	N	N	N	N	N	N	N
hypothetical-protein-143	N	N	N	N	N	N	N	N	N	N	N	N	N	N	N	N	N	N	N	N	N	N	N	N	N	N	N	N	N	N	N	N	N	N	N	N	N	N	N	N	N	N	N	N	N	N	N	N	N
hypothetical-protein-145	N	Y	N	N	N	N	N	N	N	N	N	N	N	N	N	N	N	N	N	N	N	N	N	N	N	N	N	N	N	N	N	N	N	N	N	N	N	N	N	N	N	N	N	N	N	N	N	N	N
hypothetical-protein-146	N	N	N	N	N	N	N	N	N	N	N	N	N	N	Y(130117:129572)	N	N	N	N	N	N	N	N	N	N	N	N	N	N	N	N	N	N	N	N	N	Y(130004:129459)	N	N	Y(131079:130534)	Y(130063:129518)	Y(130106:129561)	Y(131594:131049)	Y(131378:130833)	N	Y(129554:129012)	Y(89699:89112)	Y(87236:86661)	Y(89990:89415)
hypothetical-protein-147	N	N	N	N	N	N	N	N	N	N	N	N	N	N	N	N	N	N	N	N	N	N	N	N	N	N	N	N	N	N	N	N	N	N	N	N	N	N	N	N	N	N	N	N	N	N	N	N	N
hypothetical-protein-150	N	N	N	N	N	N	N	N	N	N	N	N	N	N	N	N	N	N	N	N	N	N	N	N	N	N	N	N	N	N	N	N	N	N	N	N	N	N	N	N	N	N	N	N	N	N	N	N	N
hypothetical-protein-151	N	N	N	N	N	N	N	N	N	N	N	N	N	N	N	N	N	N	N	N	N	N	N	N	N	N	N	N	N	N	N	N	N	N	N	N	N	N	N	N	N	N	N	N	N	N	Y(16708:16529)	Y(16598:16419)	Y(16613:16434)
hypothetical-protein-152	N	N	N	N	N	N	N	N	N	N	N	N	N	N	N	N	N	N	N	N	N	N	N	N	N	N	N	N	N	N	N	N	N	N	N	N	N	N	N	N	N	N	N	N	N	N	Y(122018:122221)	Y(119640:119843)	Y(122354:122557)
hypothetical-protein-153	N	N	N	N	N	N	N	N	N	N	N	N	N	N	N	N	N	N	N	N	N	N	N	N	N	N	N	N	N	N	N	N	N	N	N	N	N	N	N	N	N	N	N	N	N	N	N	N	N
hypothetical-protein-154	N	N	N	N	N	N	N	N	N	N	N	N	N	N	N	N	N	N	N	N	N	N	N	N	N	N	N	N	N	N	N	N	N	N	N	N	N	N	N	N	N	N	N	N	N	N	N	N	N
hypothetical-protein-155	N	N	N	N	N	N	N	N	N	N	N	N	N	N	N	N	N	N	N	N	N	N	N	N	N	N	N	N	N	N	N	N	N	N	Y(119203:118997)	N	N	N	N	N	N	N	N	N	N	N	N	N	N
hypothetical-protein-156	N	N	N	N	N	N	N	N	N	N	N	N	N	N	N	N	N	N	N	N	N	N	N	N	N	N	N	N	N	N	N	N	N	N	N	N	N	N	N	N	N	N	N	N	N	N	Y(30991:30827)	Y(30987:30823)	Y(31162:30998)
hypothetical-protein-157	N	N	N	N	N	N	N	N	N	N	N	N	N	N	N	N	N	N	N	N	N	N	N	N	N	N	N	N	N	N	N	N	N	N	Y	N	N	N	N	N	N	N	N	N	N	N	Y(3124:3327)	Y(3129:3278)	Y(3122:3298)
hypothetical-protein-158	N	N	N	N	N	N	N	N	N	N	N	N	N	N	N	N	N	N	N	N	N	N	N	N	N	N	N	N	N	N	N	N	N	N	N	N	N	N	N	N	N	N	N	N	N	N	N	N	N
hypothetical-protein-160	N	N	N	N	N	N	N	N	N	N	N	N	N	N	N	N	N	N	N	N	N	N	N	N	N	N	N	N	N	N	N	N	N	N	N	N	Y(70220:70044)	N	N	N	N	N	N	N	N	Y(69774:69598)	N	N	N
hypothetical-protein-163	N	N	N	N	Y(90744:91265)	N	N	N	N	N	N	N	N	N	N	N	N	N	N	N	N	N	N	N	N	N	N	N	Y(90309:90830)	N	Y(87452:86145)	N	N	N	N	N	N	N	N	N	N	N	N	N	N	N	Y	Y	Y
hypothetical-protein-164	N	N	Y(5692:5255)	N	N	N	N	N	N	N	N	N	N	N	N	N	N	N	N	N	N	N	Y(5657:5220)	N	N	N	N	N	N	N	N	N	N	N	N	N	N	N	N	N	N	N	N	N	N	N	N	N	N
hypothetical-protein-165	N	N	N	N	Y	N	N	N	N	N	N	N	N	N	N	N	N	N	N	N	N	N	N	N	N	N	N	N	Y	N	N	N	N	N	N	N	N	N	N	N	N	N	N	N	N	N	Y(50954:50742)	N	Y(51095:50883)
hypothetical-protein-166	N	N	N	N	N	N	N	N	N	N	N	N	N	N	N	N	N	N	N	N	N	N	N	N	N	N	N	N	N	N	N	N	N	N	N	N	N	N	N	N	N	N	N	N	N	N	N	N	N
hypothetical-protein-167	N	N	N	N	N	N	N	N	N	N	N	N	N	N	N	N	N	N	N	N	N	N	N	N	N	N	N	N	N	N	N	N	N	N	N	N	N	N	N	N	N	N	N	N	N	N	Y(43910:43545)	Y(43877:43491)	Y(44071:43709)
hypothetical-protein-169	N	N	N	N	N	N	N	N	N	N	N	N	N	N	N	Y(7908:8069)	Y(7940:8101)	Y(7908:8069)	N	Y(7937:8098)	N	N	Y	N	N	N	N	N	Y	Y	N	Y(7951:8112)	Y(7940:8101)	Y(7940:8101)	N	N	N	Y(7930:8091)	N	N	N	N	N	N	N	N	N	N	N
hypothetical-protein-170	N	N	N	N	N	N	N	N	N	N	N	N	N	N	N	N	N	N	N	N	N	N	N	N	N	N	N	N	N	N	N	N	N	N	N	N	N	N	N	N	N	N	N	N	N	N	Y(58103:57828)	N	Y(58144:57800)
hypothetical-protein-172	N	N	Y	N	N	N	N	N	N	N	N	N	N	N	N	N	N	N	N	N	N	N	Y	N	N	N	N	N	N	N	N	N	N	N	N	N	N	N	N	N	N	N	N	N	N	N	N	N	N
hypothetical-protein-174	N	N	N	N	N	N	N	N	N	N	N	N	N	N	N	N	N	N	N	N	N	N	N	N	N	N	N	N	N	N	N	N	N	N	N	N	N	N	N	N	N	N	N	N	N	N	N	N	N
hypothetical-protein-175	N	Y(39721:40707)	Y(4614:4784)	N	N	N	N	N	N	N	N	N	N	N	N	N	N	N	N	N	N	N	Y(4525:4734)	N	N	N	N	N	N	N	N	N	N	N	N	N	N	N	N	N	N	N	N	N	N	N	N	N	N
hypothetical-protein-176	N	N	N	N	N	N	N	N	N	N	N	N	N	N	N	N	N	N	N	N	N	N	N	N	N	N	N	N	N	N	N	N	N	N	N	N	N	N	N	N	N	N	N	N	N	N	Y(62692:62465)	Y	Y(62818:62591)
hypothetical-protein-180	N	N	N	N	N	N	N	N	N	N	N	N	N	N	N	N	N	N	N	N	N	N	N	N	N	N	N	N	N	N	N	N	N	N	N	N	N	N	N	N	N	N	N	N	N	N	Y(30912:30730)	Y(30908:30765)	Y(31083:30901)
hypothetical-protein-182	N	N	N	N	N	N	N	N	N	N	N	N	N	N	N	N	N	N	N	N	N	N	N	N	N	N	N	N	N	N	N	N	N	N	N	N	N	N	N	N	N	N	N	N	N	N	N	N	N
hypothetical-protein-184	N	N	N	N	N	N	N	N	N	N	N	N	N	N	N	N	N	N	N	N	N	N	N	N	N	N	N	N	N	N	N	N	N	N	N	N	N	N	N	N	N	N	N	N	N	N	Y	Y(20306:21208)	Y(20328:21314)
hypothetical-protein-185	N	N	N	N	N	Y(6164:7705)	Y(6188:7732)	Y(6188:7750)	Y(6162:7724)	Y(6164:7723)	Y(6180:7727)	Y(6158:7729)	N	N	N	N	N	N	N	N	N	N	N	N	N	N	N	N	N	N	N	N	N	N	N	N	N	N	N	N	N	N	N	N	N	N	N	N	N
hypothetical-protein-186	N	N	N	N	N	N	N	N	N	N	N	N	N	N	N	N	N	N	N	N	N	N	N	N	N	N	N	N	N	N	N	N	N	N	N	N	N	N	N	N	N	N	N	N	N	N	N	N	N
hypothetical-protein-187	N	N	N	N	N	N	N	N	N	N	N	N	N	N	N	N	N	N	N	N	N	N	N	N	N	N	N	N	N	N	N	N	N	N	N	N	N	N	N	N	N	N	N	N	N	N	N	N	N
hypothetical-protein-188	N	N	N	N	N	N	N	N	N	N	N	N	N	N	N	N	N	N	N	N	N	N	N	N	Y(141569:141303)	Y(140569:140303)	N	N	N	N	N	N	N	N	N	N	N	N	N	N	N	N	N	N	N	N	N	N	N
hypothetical-protein-190	N	N	N	Y(11249:11091)	N	N	N	N	N	N	N	N	Y(11204:11046)	Y(11204:11046)	N	N	N	N	N	N	N	N	N	N	N	N	N	N	N	N	N	N	N	N	N	Y(11209:11051)	N	N	N	N	N	N	N	N	N	N	N	N	N
hypothetical-protein-191	Y	N	Y(105379:105936)	Y(42390:41203)	N	N	N	N	N	N	N	N	Y(42315:41128)	Y(37455:36268)	N	N	N	N	N	N	N	N	N	N	N	N	N	N	N	N	N	N	N	N	N	Y(43837:42650)	N	N	N	N	N	N	N	N	N	N	N	N	N
hypothetical-protein-192	N	N	N	Y(45027:44719)	N	N	N	N	N	N	N	N	Y(44961:44653)	Y(40101:39793)	N	N	N	N	N	N	N	Y	N	N	N	N	N	N	N	Y	N	N	N	N	N	Y(46483:46175)	N	N	N	N	N	N	N	N	N	N	N	N	N
hypothetical-protein-193	N	N	N	Y(91691:92191)	N	N	N	N	N	N	N	N	Y(92233:92733)	Y(87373:87873)	N	N	N	N	N	N	Y(108174:108821)	N	N	Y(89109:89618)	Y(89505:90014)	Y(89280:89789)	Y(89245:89754)	Y(89056:89565)	N	N	N	N	N	N	N	Y(93372:93872)	N	N	N	N	N	N	N	N	Y(109769:110416)	N	Y(101178:101666)	Y(98695:99183)	Y(101468:101956)
hypothetical-protein-194	N	N	N	Y(81208:81041)	N	N	N	N	N	N	N	N	Y(81673:81506)	Y(76813:76646)	N	N	N	N	N	N	N	N	N	N	N	N	N	N	N	N	N	N	N	N	N	Y(82885:82718)	N	N	N	N	N	N	N	N	N	N	N	N	N
hypothetical-protein-195	N	N	N	Y(31395:31030)	N	N	N	N	N	N	N	N	Y(31475:30957)	Y(26615:26097)	N	N	N	N	N	N	N	N	N	N	N	N	N	N	N	N	N	N	N	N	N	Y(32985:32467)	N	N	N	N	N	N	N	N	N	N	N	N	N
hypothetical-protein-196	N	N	N	Y(4830:5117)	N	N	N	N	N	N	N	N	Y(4833:5120)	Y(4833:5120)	N	N	N	N	N	N	N	N	N	N	N	N	N	N	N	N	N	N	N	N	N	Y(4765:5109)	N	N	N	N	N	N	N	N	N	N	N	N	N
hypothetical-protein-197	N	N	N	N	N	N	N	N	N	N	N	N	N	N	N	N	N	N	N	N	N	N	N	N	N	N	N	N	N	N	N	N	N	N	N	N	N	N	N	N	N	N	N	N	N	Y(44243:44145)	N	N	N
hypothetical-protein-198	N	N	N	N	N	N	N	N	N	N	N	N	N	N	N	N	N	N	N	N	N	N	N	N	N	N	N	N	N	N	N	N	N	N	N	N	N	N	N	N	N	N	N	N	N	N	N	Y(20307:20131)	Y(20329:20165)
hypothetical-protein-202	N	N	N	Y(50874:51494)	N	N	N	N	N	N	N	N	Y(51011:51631)	Y(46151:46771)	N	N	N	N	N	N	N	N	N	N	N	N	N	N	N	N	N	N	N	N	N	Y(52534:53154)	N	N	N	N	N	N	N	N	N	N	N	N	N
hypothetical-protein-203	N	N	N	N	N	N	N	N	N	N	N	N	N	N	N	N	N	N	N	N	N	N	N	N	N	N	N	N	N	Y	N	N	N	N	N	N	N	N	N	N	N	N	N	N	N	N	N	N	N
hypothetical-protein-204	N	N	Y(6626:6880)	N	N	N	N	N	N	N	N	N	N	N	N	N	N	N	N	N	N	N	N	N	N	N	N	N	N	N	N	N	N	N	N	N	N	N	N	N	N	N	N	N	N	N	N	N	N
hypothetical-protein-205	N	N	N	N	N	N	N	N	N	N	N	N	N	N	N	N	N	N	N	N	N	N	N	N	N	N	N	N	N	N	N	N	N	N	N	N	N	N	N	N	N	N	N	N	N	N	N	N	N
hypothetical-protein-206	N	N	N	N	N	N	N	N	N	N	N	N	N	N	N	N	N	N	N	N	N	N	N	N	N	N	N	N	N	N	N	N	N	N	N	N	N	N	N	N	N	N	N	N	N	N	N	N	N
hypothetical-protein-207	N	N	N	N	N	N	N	N	N	N	N	N	N	N	N	N	N	N	N	N	N	N	N	N	N	N	N	N	N	N	N	N	N	N	N	N	N	N	N	N	N	N	N	N	N	N	N	N	N
hypothetical-protein-208	N	N	N	N	N	N	N	N	N	N	N	N	N	N	N	N	N	N	N	N	N	N	N	N	N	N	N	N	N	N	Y(126244:126867)	N	N	N	N	N	N	N	N	N	N	N	N	N	N	N	N	N	N
hypothetical-protein-209	N	N	N	N	N	N	N	N	N	N	N	N	N	N	N	N	N	N	N	N	N	N	N	N	N	N	N	N	N	N	N	N	N	N	N	Y	N	N	N	N	N	N	N	N	N	N	N	N	N
hypothetical-protein-211	N	N	N	N	N	Y(39401:39583)	Y(38829:39011)	Y(46545:46727)	Y(39057:39239)	Y(39442:39624)	Y(39445:39627)	Y(39175:39357)	N	N	N	N	N	N	N	N	N	N	N	N	N	N	N	N	N	N	N	N	N	N	N	N	N	N	N	N	N	N	N	N	N	N	N	N	N
hypothetical-protein-212	N	N	N	Y	N	N	N	N	N	N	N	N	Y(4896:4723)	Y(4896:4723)	N	N	N	N	N	N	N	N	N	N	N	N	N	N	N	N	N	N	N	N	N	Y(4886:4713)	N	N	N	N	N	N	N	N	N	N	N	N	N
hypothetical-protein-213	N	N	N	N	N	N	N	N	N	N	N	N	N	N	N	N	N	N	N	N	N	N	N	N	N	N	N	N	N	N	N	N	N	N	N	N	N	N	N	N	N	N	N	N	N	N	N	N	N
hypothetical-protein-214	N	N	N	N	N	N	N	N	N	N	N	N	N	N	N	N	N	N	N	N	Y	N	N	N	N	N	N	N	N	N	N	N	N	N	N	N	N	N	N	N	N	N	N	N	N	N	N	N	N
hypothetical-protein-215	N	N	N	N	N	N	N	N	N	N	N	N	N	N	N	N	N	N	N	N	N	N	N	N	N	N	N	N	N	N	N	N	N	N	N	N	N	N	N	N	N	N	N	N	N	N	N	N	N
hypothetical-protein-216	N	N	N	N	N	N	N	N	N	N	N	N	N	N	N	Y(113981:113778)	Y(111245:111042)	Y(111839:111636)	Y(112061:111858)	Y(111895:111692)	N	N	N	N	N	N	N	N	N	N	N	Y	Y	Y	N	N	N	Y(111966:111763)	N	N	N	N	N	N	N	N	N	N	N
hypothetical-protein-217	N	N	N	N	N	Y(82683:82399)	Y(81992:81708)	Y(89734:89450)	Y(82297:82013)	Y(82578:82294)	Y(82730:82446)	Y(82444:82160)	N	N	N	N	N	N	N	N	N	N	N	N	N	N	N	N	N	N	N	N	N	N	N	N	N	N	N	N	N	N	N	N	N	N	N	N	N
hypothetical-protein-218	N	N	Y(36967:36257)	N	N	N	N	N	N	N	N	N	N	N	N	N	N	N	N	N	N	Y(118996:118262)	Y(35780:35076)	N	N	N	N	N	N	N	N	N	N	N	N	N	N	N	N	N	N	N	N	N	N	N	N	N	N
hypothetical-protein-219	N	N	N	N	N	N	N	N	N	N	N	N	N	N	N	N	N	N	N	N	N	N	N	N	N	N	N	N	N	N	N	N	N	N	N	N	N	N	N	N	N	N	N	N	N	N	N	N	N
hypothetical-protein-22	Y(46613:47329)	N	N	Y(36751:37467)	N	Y(39759:40484)	Y(39187:39912)	Y(46903:47628)	Y(39415:40140)	Y(39800:40525)	Y(39803:40528)	Y(39533:40258)	Y(36680:37396)	Y(31820:32536)	N	N	N	N	N	N	Y(45208:46113)	N	N	Y(125853:125266)	Y(126236:125649)	Y(125244:124657)	Y(125200:124613)	Y(125786:125199)	N	Y	N	N	N	N	N	Y(38194:38910)	N	N	Y(129875:129111)	N	N	N	N	N	Y(44484:45389)	N	N	N	N
hypothetical-protein-220	N	N	N	Y(4720:4454)	N	N	N	N	N	N	N	N	Y(4723:4571)	Y(4723:4571)	N	N	N	N	N	N	N	N	N	N	N	N	N	N	N	N	N	N	N	N	N	Y(4713:4543)	N	N	N	N	N	N	N	N	N	N	N	N	N
hypothetical-protein-221	N	N	N	N	N	N	N	N	N	N	N	N	N	N	Y	N	N	N	N	N	N	N	N	N	N	N	N	N	N	N	Y(67735:67947)	N	N	N	N	N	Y	N	Y(103581:103207)	N	Y	Y	Y	Y	N	Y	N	N	N
hypothetical-protein-222	N	N	Y(87314:87081)	N	N	N	N	N	N	N	N	N	N	N	N	N	N	N	N	N	N	N	N	N	N	N	N	N	N	N	N	N	N	N	N	N	N	N	N	N	N	N	N	N	N	N	N	N	N
hypothetical-protein-223	N	N	N	N	N	Y(83657:83400)	Y(82965:82708)	Y(90707:90450)	Y(83270:83013)	Y(83552:83295)	Y(83704:83447)	Y(83417:83160)	N	N	N	N	N	N	N	N	N	N	N	N	N	N	N	N	N	N	N	N	N	N	N	N	N	N	N	N	N	N	N	N	N	N	N	N	N
hypothetical-protein-224	N	N	Y	N	N	N	N	N	N	N	N	N	N	N	N	N	N	N	N	N	N	N	Y(89003:89356)	N	N	N	N	N	N	N	N	N	N	N	N	N	N	N	N	N	N	N	N	N	N	N	N	N	N
hypothetical-protein-225	N	N	N	N	N	N	N	N	N	N	N	N	N	N	N	N	N	N	N	N	N	N	N	N	N	N	N	N	N	N	N	N	N	N	N	N	N	N	N	N	N	N	N	N	N	N	N	N	N
hypothetical-protein-226	N	N	N	N	N	N	N	N	N	N	N	N	N	N	N	N	N	N	N	N	N	N	N	N	N	N	N	N	N	N	N	N	N	N	N	N	N	N	N	N	N	N	N	N	N	N	N	N	N
hypothetical-protein-227	N	N	N	N	N	N	N	N	N	N	N	N	N	N	N	N	N	N	N	N	N	N	Y(93438:92767)	N	N	N	N	N	N	N	N	N	N	N	N	N	N	N	N	N	N	N	N	N	N	N	N	N	N
hypothetical-protein-228	N	N	N	N	N	N	N	N	N	N	N	N	N	N	N	N	N	N	N	N	N	N	N	N	N	N	N	N	N	N	N	N	N	N	N	N	N	N	N	N	N	N	N	N	N	N	N	N	N
hypothetical-protein-229	N	N	N	N	N	N	N	N	N	N	N	N	N	N	N	N	N	N	N	N	N	N	N	N	N	N	N	N	N	N	N	N	N	N	N	N	N	N	N	N	N	N	N	N	N	N	N	N	N
hypothetical-protein-230	Y	N	N	N	N	N	N	N	N	N	N	N	N	N	N	N	N	N	N	N	Y	N	N	N	N	N	N	N	N	N	N	N	N	N	N	N	N	N	N	N	N	N	N	N	Y	N	N	N	N
hypothetical-protein-231	N	N	Y	N	N	Y	Y	Y	Y	Y	Y	Y	N	N	N	N	N	N	N	N	N	N	Y(51020:50721)	Y	Y	Y	Y	Y	N	N	N	N	N	N	N	N	N	N	N	N	N	N	N	N	N	N	N	N	N
hypothetical-protein-233	N	N	Y	N	N	N	N	N	N	N	N	N	N	N	N	N	N	N	N	N	N	N	N	N	N	N	N	N	N	N	N	N	N	N	N	N	N	N	N	N	N	N	N	N	N	N	N	N	N
hypothetical-protein-235	N	N	N	N	N	N	N	N	N	N	N	N	N	N	N	N	N	N	N	N	N	N	N	Y(144431:144628)	Y(144827:145024)	Y(143827:144024)	Y(143787:143984)	Y(144371:144568)	Y	N	N	N	N	N	N	N	N	N	N	N	N	N	N	N	N	N	N	N	N
hypothetical-protein-236	N	N	N	N	N	N	N	N	N	N	N	N	N	N	N	N	N	N	N	N	N	N	N	N	N	N	N	N	N	N	N	N	N	N	N	N	N	N	N	N	N	N	N	N	N	N	N	N	N
hypothetical-protein-237	N	N	N	N	N	N	N	N	N	N	N	N	N	N	N	N	N	N	N	N	N	N	N	Y(6952:7596)	Y(7215:7859)	Y(7120:7764)	Y(6853:7497)	Y(6711:7355)	N	N	N	N	N	N	N	N	N	N	N	N	N	N	N	N	N	N	N	N	N
hypothetical-protein-238	N	N	N	N	N	N	N	N	N	N	N	N	N	N	N	N	N	N	N	N	N	N	N	N	N	N	N	N	N	N	N	N	N	N	N	N	N	N	N	N	N	N	N	N	N	N	N	N	N
hypothetical-protein-239	N	N	N	N	N	N	N	N	N	N	N	N	N	N	N	N	N	N	N	N	Y	N	N	N	N	N	N	N	N	N	N	N	N	N	N	N	N	N	N	N	N	N	N	N	N	N	N	N	N
hypothetical-protein-240	N	N	N	N	N	N	N	N	N	N	N	N	N	N	N	N	N	N	N	N	N	N	N	N	N	N	N	N	N	N	N	N	N	N	N	N	N	N	N	N	N	N	N	N	N	N	N	N	N
hypothetical-protein-241	N	N	N	N	N	N	N	N	N	N	N	N	N	N	N	N	N	N	N	N	N	N	N	N	N	N	N	N	N	N	N	N	N	N	N	N	N	N	N	N	N	N	N	N	N	N	N	N	N
hypothetical-protein-242	N	N	N	N	N	N	N	N	N	N	N	N	N	N	N	N	N	N	N	N	N	N	N	N	N	N	N	N	N	N	N	N	N	N	N	N	N	N	N	N	N	N	N	N	N	N	N	N	N
hypothetical-protein-243	Y	N	N	N	N	N	N	N	N	N	N	N	N	N	N	N	N	N	N	N	N	N	N	N	N	N	N	N	N	N	N	N	N	N	N	N	N	N	N	Y	N	N	N	N	N	N	N	N	N
hypothetical-protein-245	N	N	N	N	N	N	N	N	N	N	N	N	N	N	N	N	N	N	N	N	N	N	N	N	N	N	N	N	N	N	N	N	N	N	N	N	N	N	N	N	N	N	N	N	N	N	N	N	N
hypothetical-protein-246	N	N	N	N	Y(2598:2032)	N	N	N	N	N	N	N	N	N	N	N	N	N	N	N	N	N	N	N	N	N	N	N	Y(2597:2031)	N	Y	N	N	N	N	N	N	N	N	N	N	N	N	N	N	N	Y(2741:2175)	Y(2746:2180)	Y(2739:2173)
hypothetical-protein-247	N	Y	N	N	N	N	N	N	N	N	N	N	N	N	N	N	N	N	N	N	N	N	N	N	N	N	N	N	N	N	N	N	N	N	N	N	N	N	N	N	N	N	N	N	N	N	N	N	N
hypothetical-protein-248	N	N	N	N	N	N	N	N	N	N	N	N	N	N	N	N	N	N	N	N	N	N	N	N	N	N	N	N	N	Y	N	N	N	N	N	N	N	N	N	N	N	N	N	N	N	N	N	N	N
hypothetical-protein-249	N	N	N	N	N	N	N	N	N	N	N	N	N	N	N	N	N	N	N	N	N	N	N	N	N	N	N	N	N	N	N	N	N	N	N	N	N	N	N	N	N	N	N	N	N	N	N	N	N
hypothetical-protein-250	N	N	N	N	N	N	N	N	N	N	N	N	N	N	N	N	N	N	N	N	N	N	N	N	N	N	N	N	N	N	Y(120682:119249)	N	N	N	N	N	N	N	N	N	N	N	N	N	N	N	N	N	N
hypothetical-protein-251	N	N	N	N	N	N	N	N	N	N	N	N	N	N	N	N	N	N	N	N	N	N	N	N	N	N	N	N	N	N	N	N	N	N	N	N	N	N	N	N	N	N	N	N	N	N	N	N	N
hypothetical-protein-252	N	N	N	N	N	N	N	N	N	N	N	N	N	N	N	N	N	N	N	N	N	N	N	N	N	N	N	N	N	N	N	N	N	N	N	N	N	N	N	N	N	N	N	N	N	N	N	N	N
hypothetical-protein-253	N	N	N	N	N	N	N	N	N	N	N	N	N	N	N	N	N	N	N	N	N	N	N	N	N	N	N	N	N	N	N	N	N	N	Y(118597:118767)	N	N	N	N	N	N	N	N	N	N	N	N	N	N
hypothetical-protein-254	N	N	N	N	N	N	N	N	N	N	N	N	N	N	N	N	N	N	N	N	N	N	N	N	N	N	N	N	N	N	N	N	N	N	N	N	N	N	N	N	N	N	N	N	N	N	N	N	N
hypothetical-protein-255	Y(20522:20770)	N	N	N	N	N	N	N	N	N	N	N	N	N	N	N	N	N	N	N	N	N	N	N	N	N	N	N	N	N	N	N	N	N	N	N	N	N	N	N	N	N	Y	N	N	N	N	N	N
hypothetical-protein-256	N	N	N	N	N	N	N	N	N	N	N	N	N	N	N	Y	Y	Y	Y	Y	N	N	N	N	N	N	N	N	N	N	N	Y	Y	Y	Y(149125:149391)	N	N	Y	N	N	N	N	N	N	N	N	N	N	N
hypothetical-protein-257	N	N	N	N	N	N	N	N	N	N	N	N	N	N	N	N	N	N	N	N	N	N	N	N	N	N	N	N	N	N	N	N	N	N	N	N	N	N	N	N	N	N	N	N	N	N	N	N	N
hypothetical-protein-258	N	N	N	N	N	N	N	N	N	N	N	N	N	N	N	N	N	N	N	N	N	N	N	N	N	N	N	N	N	N	N	N	N	N	N	N	N	N	N	N	N	N	N	N	N	N	N	N	N
hypothetical-protein-259	N	N	N	N	N	N	N	N	N	N	N	N	N	N	N	N	N	N	N	N	N	N	N	N	N	N	N	N	N	N	N	N	N	N	Y(71715:70990)	N	N	N	N	N	N	N	N	N	N	N	N	N	N
hypothetical-protein-26	Y(55345:54908)	N	N	N	N	N	N	N	N	N	N	N	N	N	Y(102742:103098)	N	N	N	N	N	Y(53475:53113)	N	N	N	N	N	N	N	N	N	N	N	N	N	Y(132186:132506)	N	Y(102982:103329)	N	N	Y(103563:103919)	Y(102521:102877)	Y(102589:102945)	Y(104112:104468)	Y(103925:104281)	Y(52797:52435)	Y(102488:102883)	N	N	N
hypothetical-protein-260	N	N	N	N	N	N	N	N	N	N	N	N	N	N	N	N	Y(104296:104511)	Y(104905:105081)	N	N	N	N	N	N	N	N	N	N	N	N	N	N	N	N	N	N	N	Y(105023:105235)	N	Y	N	N	N	N	N	N	N	N	N
hypothetical-protein-261	N	N	N	N	N	N	N	N	N	N	N	N	N	N	N	N	N	N	N	N	N	N	N	N	N	N	N	N	N	N	N	N	N	N	Y(37880:38125)	N	N	N	N	N	N	N	N	N	N	N	N	N	N
hypothetical-protein-262	N	N	N	N	N	N	N	N	N	N	N	N	N	N	N	N	N	N	N	N	N	N	N	Y(12039:11857)	Y(12321:12139)	Y(12207:12025)	Y(11996:11814)	Y(11817:11635)	N	N	N	N	N	N	N	N	N	N	N	N	N	N	N	N	N	N	N	N	N
hypothetical-protein-263	N	N	N	N	N	N	N	N	N	N	N	N	N	N	N	N	N	N	N	N	N	N	N	Y(141504:141337)	Y(141900:141733)	Y(140900:140733)	Y(140860:140693)	Y(141444:141277)	N	N	N	N	N	N	N	N	N	N	N	N	N	N	N	N	N	N	N	N	N
hypothetical-protein-264	N	N	N	N	N	N	N	N	N	N	N	N	N	N	N	N	N	N	N	N	N	N	N	Y(48495:48716)	Y(48797:49018)	Y(48664:48885)	Y(48470:48691)	Y(48291:48512)	N	N	N	N	N	N	N	N	N	N	N	N	N	N	N	N	N	N	N	N	N
hypothetical-protein-265	N	N	N	N	N	N	N	N	N	N	N	N	N	N	N	N	N	N	N	N	N	N	N	Y(125852:126061)	Y(126235:126444)	Y(125243:125452)	Y(125199:125408)	Y(125785:125994)	N	N	N	N	N	N	N	N	N	N	N	N	N	N	N	N	N	N	N	N	N
hypothetical-protein-266	N	N	N	N	N	N	N	N	N	N	N	N	N	N	N	N	N	N	N	N	N	N	N	Y(118507:118352)	Y(118889:118734)	Y(117897:117742)	Y(117853:117698)	Y(118440:118285)	N	N	N	N	N	N	N	N	N	N	N	N	N	N	N	N	N	N	N	N	N
hypothetical-protein-267	N	N	N	N	N	N	N	N	N	N	N	N	N	N	N	Y	Y	Y	Y	Y	N	N	N	Y(141173:140907)	N	N	Y(140529:140263)	Y(141113:140847)	N	N	N	N	N	N	N	N	N	Y	N	N	N	N	N	N	N	N	N	N	N
hypothetical-protein-268	Y(55994:55332)	N	N	N	N	N	N	N	N	N	N	N	N	N	N	N	N	N	N	N	Y(54265:53651)	N	N	N	N	N	N	N	N	N	N	N	N	N	N	N	N	N	N	N	N	N	N	N	N	N	N	N	N
hypothetical-protein-269	N	N	N	N	N	N	N	N	N	N	N	N	N	N	N	N	N	N	N	N	N	N	N	N	N	N	N	N	N	N	N	N	N	N	N	N	N	N	N	N	N	N	N	N	N	N	N	N	N
hypothetical-protein-27	Y(144810:145067)	N	N	Y(123073:123393)	N	N	N	N	N	N	N	N	Y(123503:123823)	Y(118583:118903)	Y(16167:15886)	N	N	N	N	N	Y(145591:145842)	N	N	N	N	N	N	N	N	N	N	N	N	N	Y(26859:26641)	Y(124746:125066)	Y(16192:15911)	N	N	Y(16180:15899)	Y(16127:15846)	Y(16134:15853)	Y(16145:15864)	Y(16144:15863)	Y(145037:145288)	Y(16174:15893)	N	N	N
hypothetical-protein-270	N	N	N	N	N	N	N	N	N	N	N	N	N	N	N	N	N	N	N	N	N	N	N	N	N	N	N	N	N	N	N	N	N	N	N	N	N	N	N	N	N	N	N	N	N	N	N	N	N
hypothetical-protein-271	N	N	N	N	N	N	N	N	N	N	N	N	N	N	N	N	N	N	N	N	N	N	N	N	N	N	N	N	N	N	N	N	N	N	N	N	N	N	N	N	N	N	N	N	N	N	N	N	N
hypothetical-protein-272	N	N	N	N	N	N	N	N	N	N	N	N	N	N	N	N	N	N	N	N	N	N	N	N	N	N	N	N	N	N	Y(5100:4591)	N	N	N	N	N	N	N	N	N	N	N	N	N	N	N	N	N	N
hypothetical-protein-274	N	N	N	Y	N	N	N	N	N	N	N	N	N	N	N	N	N	N	N	N	N	N	N	N	N	N	N	N	N	N	N	N	N	N	Y	Y(120185:120553)	N	N	N	N	N	N	N	N	N	N	N	N	N
hypothetical-protein-276	N	N	N	N	N	N	N	N	N	N	N	N	N	N	N	N	N	N	N	N	N	N	N	Y(113044:111203)	Y(113421:111580)	Y(113214:111373)	Y(113170:111329)	Y(112973:111132)	N	N	N	N	N	N	N	N	N	N	N	N	N	N	N	N	N	N	N	N	N
hypothetical-protein-277	N	N	N	N	N	N	N	N	N	N	N	N	N	N	N	N	N	N	N	N	N	N	N	N	N	N	N	N	N	N	N	N	N	N	N	N	N	N	N	N	N	N	N	N	N	N	N	N	N
hypothetical-protein-278	N	N	N	N	N	N	N	N	N	N	N	N	N	N	N	N	N	N	N	N	N	N	Y(38639:39037)	N	N	N	N	N	N	N	N	N	N	N	N	N	N	N	N	N	N	N	N	N	N	N	N	N	N
hypothetical-protein-279	N	N	N	N	N	N	N	N	N	N	N	N	N	N	N	N	N	N	N	N	N	Y	N	N	N	N	N	N	N	N	N	N	N	N	N	N	N	N	N	N	N	N	N	N	N	N	N	N	N
hypothetical-protein-280	N	N	N	N	N	N	N	N	N	N	N	N	N	N	N	Y	N	N	N	N	N	Y	N	N	N	N	N	N	N	N	N	N	N	N	Y	N	N	N	N	N	N	N	N	N	N	N	N	N	N
hypothetical-protein-281	N	N	N	N	N	N	N	N	N	N	N	N	N	N	N	N	N	N	N	N	N	Y	N	N	N	N	N	N	N	N	N	N	N	N	Y	N	N	N	N	N	N	N	N	N	N	N	N	N	N
hypothetical-protein-283	N	N	N	N	N	N	N	N	N	N	N	N	N	N	N	N	N	N	N	N	N	N	N	N	N	N	N	N	N	N	N	N	N	N	N	N	N	N	N	N	N	N	N	N	N	N	N	N	N
hypothetical-protein-284	N	N	N	N	N	Y(23339:22902)	Y(22755:22318)	Y(30475:30038)	Y(22983:22546)	Y(23351:22914)	Y(23367:22930)	Y(23104:22667)	N	N	N	N	N	N	N	N	N	N	N	N	N	N	N	N	N	N	N	N	N	N	N	N	N	N	N	N	N	N	N	N	N	N	N	N	N
hypothetical-protein-285	N	N	N	N	N	N	N	N	N	N	N	N	N	N	N	N	N	N	N	N	N	N	N	N	N	N	N	N	N	N	N	N	N	N	N	N	N	N	N	N	N	N	N	N	N	N	N	N	N
hypothetical-protein-287	N	N	N	N	N	N	N	N	N	N	N	N	N	N	N	N	N	N	N	N	N	N	N	N	N	N	N	N	N	N	N	N	N	N	N	N	N	N	N	N	N	N	N	N	N	N	N	N	N
hypothetical-protein-288	N	N	N	N	N	N	N	N	N	N	N	N	N	N	N	N	N	N	N	N	N	N	N	N	N	N	N	N	N	N	N	N	N	N	Y(141292:140942)	N	N	N	N	N	N	N	N	N	N	N	N	N	N
hypothetical-protein-289	N	N	N	N	N	N	N	N	N	N	N	N	N	N	N	N	N	N	N	N	N	N	N	N	N	N	N	N	N	N	N	N	N	N	N	N	N	N	N	N	N	N	N	N	N	N	N	N	N
hypothetical-protein-290	N	N	N	N	N	N	N	N	N	N	N	N	N	N	N	N	N	N	N	N	N	N	N	N	N	N	N	N	N	N	N	N	N	N	Y(131670:132026)	N	N	N	N	N	N	N	N	N	N	N	N	N	N
hypothetical-protein-291	N	N	N	N	N	N	N	N	N	N	N	N	N	N	N	N	N	N	N	N	N	N	N	Y(110269:109895)	Y(110646:110272)	Y(110438:110064)	Y(110393:110019)	Y(110197:109823)	N	N	N	N	N	N	N	N	N	N	N	N	N	N	N	N	N	N	N	N	N
hypothetical-protein-292	N	N	N	N	N	N	N	N	N	N	N	N	N	N	N	N	N	N	N	N	N	N	N	N	N	N	N	N	N	N	N	N	N	N	N	N	N	N	N	N	N	N	N	N	N	N	N	N	N
hypothetical-protein-293	N	N	N	N	N	N	N	N	N	N	N	N	N	N	N	N	N	N	N	N	N	N	N	N	N	N	N	N	N	N	N	N	N	N	N	N	N	N	N	N	N	N	N	N	N	N	N	N	N
hypothetical-protein-294	N	N	N	N	N	N	N	N	N	N	N	N	N	N	N	N	N	N	N	N	N	N	N	N	N	N	N	N	N	N	N	N	N	N	N	N	N	N	Y(5663:6724)	N	N	N	N	N	N	N	N	N	N
hypothetical-protein-295	N	N	N	N	N	N	N	N	N	N	N	N	N	N	N	N	N	N	N	N	N	N	N	N	N	N	N	N	N	N	N	N	N	N	N	N	N	N	N	N	N	N	N	N	N	N	N	N	N
hypothetical-protein-296	N	N	N	N	N	N	N	N	N	N	N	N	N	N	N	N	N	N	N	N	N	N	N	N	N	N	N	N	N	N	N	N	N	N	Y(71940:72563)	N	N	N	N	N	N	N	N	N	N	N	N	N	N
hypothetical-protein-297	Y	N	Y	N	N	N	N	N	N	N	N	N	N	N	N	N	N	N	N	N	N	N	N	N	N	N	N	N	N	N	N	N	N	N	N	N	N	N	N	N	N	N	N	N	N	N	N	N	N
hypothetical-protein-298	N	N	N	N	N	N	N	N	N	N	N	N	N	N	N	N	N	N	N	N	N	N	N	N	N	N	N	N	N	N	N	N	N	N	N	N	N	N	N	N	N	N	N	N	N	N	N	N	N
hypothetical-protein-299	N	N	N	N	N	N	N	N	N	N	N	N	N	N	N	N	N	N	N	N	N	Y	Y(39094:39423)	N	N	N	N	N	N	N	N	N	N	N	N	N	N	N	N	N	N	N	N	N	N	N	N	N	N
hypothetical-protein-3	Y(107891:107502)	Y(41081:40704)	Y(72214:72606)	Y(90968:90582)	Y(79873:80325)	Y(93950:93561)	Y(93258:92869)	Y(100997:100608)	Y(93560:93171)	Y(93819:93430)	Y(93991:93602)	Y(93669:93280)	Y(91510:91124)	Y(86650:86264)	Y(62867:62484)	Y(57996:57595)	Y(57166:56765)	Y(57998:57597)	Y(57713:57312)	Y(57191:56790)	Y(105986:105597)	Y(69034:69438)	Y(71434:72369)	Y(50929:51318)	Y(51235:51624)	Y(51098:51487)	Y(50904:51293)	Y(50729:51118)	Y(79436:79888)	Y(75807:75415)	Y(94300:94746)	Y(58175:57774)	Y(57759:57358)	Y(57032:56631)	Y(82024:81638)	Y(92649:92263)	Y(63526:63143)	Y(57467:57066)	Y(67679:67287)	Y(63947:63564)	Y(63373:62990)	Y(63440:63057)	Y(64519:64136)	Y(64335:63952)	Y(107581:107192)	Y(63089:62697)	Y(88571:89017)	Y(86101:86547)	Y(88874:89320)
hypothetical-protein-30	N	N	N	N	N	N	N	N	N	N	N	N	N	N	N	N	N	N	N	N	N	N	N	N	N	N	N	N	N	N	Y(6658:6104)	Y	N	N	Y(147050:147715)	N	N	N	N	N	N	N	N	N	N	N	N	N	N
hypothetical-protein-300	N	N	N	N	Y(5372:5623)	N	N	N	N	N	N	N	N	N	N	N	N	N	N	N	N	N	N	N	N	N	N	N	Y(5369:5620)	N	N	N	N	N	N	N	N	N	N	N	N	N	N	N	N	N	N	N	N
hypothetical-protein-301	N	N	N	N	Y(26495:25911)	N	N	N	N	N	N	N	N	N	N	N	N	N	N	N	N	N	N	N	N	N	N	N	Y(26529:25945)	N	N	N	N	N	N	N	N	N	N	N	N	N	N	N	N	N	N	N	N
hypothetical-protein-303	N	N	N	N	N	N	N	N	N	N	N	N	N	N	N	N	N	N	N	N	N	N	N	N	N	N	N	N	N	N	N	N	N	N	N	N	N	N	N	N	N	N	N	N	N	N	N	N	N
hypothetical-protein-304	N	N	N	N	N	N	N	N	N	N	N	N	N	N	N	N	N	N	N	N	N	N	N	N	N	N	N	N	N	N	N	N	N	N	Y(46114:45932)	N	N	N	N	N	N	N	N	N	N	N	N	N	N
hypothetical-protein-305	N	N	N	N	N	N	N	N	N	N	N	N	N	N	N	N	N	N	N	N	N	N	N	N	N	N	N	N	N	N	N	N	N	N	Y	N	N	N	N	N	N	N	N	N	N	N	N	N	N
hypothetical-protein-306	N	N	N	N	N	N	N	N	N	N	N	N	N	N	N	N	N	N	N	N	N	N	N	N	N	N	N	N	N	N	N	N	N	N	N	N	N	N	N	N	N	N	N	N	N	N	N	N	N
hypothetical-protein-307	N	N	N	N	N	N	N	N	N	N	N	N	N	N	N	N	N	N	N	N	N	N	N	N	N	N	N	N	N	N	N	N	Y(22076:21912)	N	N	N	N	N	N	N	N	N	N	N	N	N	N	N	N
hypothetical-protein-308	N	N	N	N	N	N	N	N	N	N	N	N	N	N	N	N	N	N	N	N	N	N	N	N	N	N	N	N	N	N	N	N	N	N	N	N	N	N	Y	N	N	N	N	N	N	N	N	N	N
hypothetical-protein-309	N	N	N	N	N	N	N	N	N	N	N	N	N	N	N	N	N	N	N	N	N	N	N	N	N	N	N	N	N	N	N	N	N	N	N	N	N	N	N	N	N	N	N	N	N	N	N	N	N
hypothetical-protein-31	N	N	N	N	Y(24366:23416)	N	N	N	N	N	N	N	N	N	N	N	N	N	N	N	N	N	N	N	N	N	N	N	Y(24400:23450)	N	Y(27316:26492)	N	N	N	N	N	N	N	N	N	N	N	N	N	N	N	Y(29430:28546)	Y(29447:28563)	Y(29621:28737)
hypothetical-protein-310	N	N	N	N	N	N	N	N	N	N	N	N	N	N	N	N	N	N	N	N	N	N	N	N	N	N	N	N	N	N	N	N	N	N	N	N	N	N	N	N	N	N	N	N	N	N	N	N	N
hypothetical-protein-311	Y(39516:36970)	N	N	N	N	N	N	N	N	N	N	N	N	N	N	N	N	N	Y	N	N	N	N	N	N	N	N	N	N	N	N	N	N	N	N	Y(104222:103959)	N	N	Y(107532:107008)	N	N	N	N	N	N	N	N	N	N
hypothetical-protein-312	N	N	N	N	N	N	N	N	N	N	N	N	N	N	N	N	N	N	N	N	N	N	N	N	N	N	N	N	N	N	N	N	N	N	N	N	N	N	N	N	N	N	N	N	N	N	N	N	N
hypothetical-protein-313	N	N	N	N	N	N	N	N	N	N	N	N	N	N	N	N	N	N	N	N	N	N	N	N	N	N	N	N	N	N	N	N	N	N	N	N	N	N	N	N	N	N	N	N	N	N	N	N	N
hypothetical-protein-314	N	N	N	N	N	N	N	N	N	N	N	N	N	N	N	N	N	N	N	N	N	Y	N	N	N	N	N	N	N	N	N	N	N	N	N	N	N	N	N	N	N	N	N	N	N	N	N	N	N
hypothetical-protein-315	N	N	N	N	N	N	N	N	N	N	N	N	N	N	N	N	N	N	N	N	N	Y(80135:80539)	N	N	N	N	N	N	N	N	N	N	N	N	N	N	N	N	N	N	N	N	N	N	N	N	N	N	N
hypothetical-protein-316	N	N	N	N	N	N	N	N	N	N	N	N	N	N	N	N	N	N	N	N	N	N	N	N	N	N	N	N	N	N	N	N	N	N	N	N	N	N	N	N	N	N	N	N	N	N	N	N	N
hypothetical-protein-317	N	N	N	N	N	N	N	N	N	N	N	N	N	N	Y	N	N	N	N	N	N	N	N	N	N	N	N	N	N	N	N	N	N	N	N	N	Y	N	N	Y	Y	Y	Y	Y	N	Y	N	N	N
hypothetical-protein-319	N	Y(25092:25871)	N	N	N	N	N	N	N	N	N	N	N	N	N	N	N	N	N	N	N	Y	N	N	N	N	N	N	N	N	N	N	N	N	N	N	N	N	N	N	N	N	N	N	N	N	N	N	N
hypothetical-protein-320	N	N	N	N	N	N	N	N	N	N	N	N	N	N	N	N	N	N	N	N	N	N	N	N	N	N	N	N	N	N	N	N	N	N	N	N	N	N	N	N	N	N	N	N	N	N	N	N	N
hypothetical-protein-321	N	N	N	N	N	N	N	N	N	N	N	N	N	N	N	N	N	N	N	N	N	N	N	N	N	N	N	N	N	N	N	N	N	N	Y(136653:136814)	N	N	N	N	N	N	N	N	N	N	N	N	N	N
hypothetical-protein-322	N	N	N	N	N	N	N	N	N	N	N	N	N	N	N	N	N	N	N	N	N	N	N	N	N	N	N	N	N	N	N	N	N	N	N	N	Y(37527:37321)	N	N	N	N	N	N	N	N	N	N	N	N
hypothetical-protein-324	N	Y(60971:61210)	N	N	N	N	N	N	N	N	N	N	N	N	N	N	N	N	N	N	N	N	N	N	N	N	N	N	N	N	N	N	N	N	N	N	N	N	N	N	N	N	N	N	N	N	N	N	N
hypothetical-protein-326	N	N	N	N	N	N	N	N	N	N	N	N	N	N	N	N	N	N	N	N	N	N	N	N	N	N	N	N	N	N	N	N	N	N	Y(146965:146786)	N	N	N	N	N	N	N	N	N	N	N	N	N	N
hypothetical-protein-328	N	N	N	N	N	N	N	N	N	N	N	N	N	N	N	N	N	N	N	N	N	N	N	N	N	N	N	N	N	N	N	N	N	N	N	N	Y	N	N	Y	Y	Y	Y	Y	N	Y	N	N	N
hypothetical-protein-33	N	N	N	N	Y(103521:102550)	N	N	N	N	N	N	N	N	N	N	N	N	N	N	N	N	N	N	N	N	N	N	N	Y(103700:102729)	N	Y(121859:120744)	N	N	N	N	N	N	N	N	N	N	N	N	N	N	N	Y(117832:116702)	Y(115427:114285)	Y(118142:117012)
hypothetical-protein-330	N	Y(32423:32106)	N	N	N	N	N	N	N	N	N	N	N	N	N	N	N	N	N	N	N	N	N	N	N	N	N	N	N	N	N	N	N	N	N	N	N	N	N	N	N	N	N	N	N	N	N	N	N
hypothetical-protein-331	N	Y(51762:52094)	N	N	N	N	N	N	N	N	N	N	N	N	N	N	N	N	N	N	N	N	N	N	N	N	N	N	N	N	N	N	N	N	N	N	N	N	N	N	N	N	N	N	N	N	N	N	N
hypothetical-protein-332	N	N	N	N	N	N	N	N	N	N	N	N	N	N	N	N	N	N	N	N	N	N	N	N	N	N	N	N	N	N	N	N	N	N	N	N	N	N	N	N	N	N	N	N	N	N	N	N	N
hypothetical-protein-333	N	Y(83598:84140)	N	N	N	N	N	N	N	N	N	N	N	N	N	N	N	N	N	N	N	N	N	N	N	N	N	N	N	N	N	N	N	N	N	N	N	N	N	N	N	N	N	N	N	N	N	N	N
hypothetical-protein-334	N	Y(49930:50508)	N	N	N	N	N	N	N	N	N	N	N	N	N	N	N	N	N	N	N	N	N	N	N	N	N	N	N	N	N	N	N	N	N	N	N	N	N	N	N	N	N	N	N	N	N	N	N
hypothetical-protein-335	N	Y(66997:67545)	N	N	N	N	N	N	N	N	N	N	N	N	N	N	N	N	N	N	N	N	N	N	N	N	N	N	N	N	N	N	N	N	N	N	N	N	N	N	N	N	N	N	N	N	N	N	N
hypothetical-protein-337	N	N	N	N	N	N	N	N	N	N	N	N	N	N	N	N	N	N	N	N	N	N	N	N	N	N	N	N	N	N	Y(2290:4557)	N	N	N	N	N	N	N	N	N	N	N	N	N	N	N	N	N	N
hypothetical-protein-338	N	N	N	N	N	N	N	N	N	N	N	N	N	N	N	N	N	N	N	N	N	N	N	N	N	N	N	N	N	N	Y(17764:16961)	N	N	N	N	N	N	N	N	N	N	N	N	N	N	N	Y(1276:749)	N	N
hypothetical-protein-339	N	N	N	N	Y	N	N	N	N	N	N	N	N	N	N	N	N	N	N	N	N	N	N	N	N	N	N	N	N	N	N	N	N	N	N	N	N	N	N	N	N	N	N	N	N	N	N	N	N
hypothetical-protein-34	N	N	N	N	N	N	N	N	N	N	N	N	N	N	N	N	N	N	N	N	N	N	N	N	N	N	N	N	N	Y(114335:114721)	N	N	N	N	Y(133524:133153)	N	N	N	Y(108086:108496)	N	N	N	N	N	N	N	N	N	N
hypothetical-protein-340	N	N	N	N	N	N	N	N	N	N	N	N	N	N	N	N	N	N	N	N	N	N	N	N	N	N	N	N	N	N	Y(25807:26529)	N	N	N	N	N	N	N	N	N	N	N	N	N	N	N	N	N	N
hypothetical-protein-341	N	N	N	N	N	N	N	N	N	N	N	N	N	N	N	N	N	N	N	N	N	N	N	N	N	N	N	N	N	N	Y(18724:17897)	N	N	N	N	N	N	N	N	N	N	N	N	N	N	N	N	N	N
hypothetical-protein-342	N	Y(15160:15738)	N	N	N	N	N	N	N	N	N	N	N	N	N	N	N	N	N	N	N	N	N	N	N	N	N	N	N	N	N	N	N	N	N	N	N	N	N	N	N	N	N	N	N	N	N	N	N
hypothetical-protein-343	N	N	N	N	N	N	N	N	N	N	N	N	N	N	N	N	N	N	N	N	N	N	N	N	N	N	N	N	N	N	N	N	N	N	N	N	N	N	N	N	N	N	N	N	N	N	N	N	N
hypothetical-protein-344	N	N	N	N	N	N	N	N	N	N	N	N	N	N	N	N	N	N	N	N	N	N	N	N	N	N	N	N	N	N	N	N	N	N	N	N	N	N	N	N	N	N	N	N	N	N	N	N	N
hypothetical-protein-345	Y(121352:122287)	N	N	Y(100242:101141)	N	Y(102777:103799)	Y(102090:103112)	Y(109829:110851)	Y(102412:103431)	Y(102671:103693)	Y(102848:103867)	Y(102521:103540)	Y(100791:101690)	Y(95931:96830)	Y(39737:38601)	N	N	N	N	N	Y(119426:120391)	N	N	Y(41623:40502)	Y(41892:40771)	Y(41792:40671)	Y(41573:40452)	Y(41386:40265)	N	Y(52872:51730)	N	N	N	N	Y(53664:52576)	Y(101899:102798)	Y(39886:38750)	N	Y(41459:40332)	Y(39550:38414)	Y(39407:38271)	Y(39474:38338)	Y(39738:38602)	Y(39557:38421)	Y(120999:121985)	Y(39440:38304)	N	N	N
hypothetical-protein-346	N	Y(75879:76430)	N	N	N	N	N	N	N	N	N	N	N	N	N	N	N	N	N	N	N	N	N	N	N	N	N	N	N	N	N	N	N	N	N	N	N	N	N	N	N	N	N	N	N	N	N	N	N
hypothetical-protein-347	N	N	N	N	N	N	N	N	N	N	N	N	N	N	N	N	N	N	N	N	N	N	N	N	N	N	N	N	N	N	N	N	N	N	N	N	N	N	N	N	N	N	N	N	N	N	N	N	N
hypothetical-protein-348	N	Y(79913:80125)	N	N	N	N	N	N	N	N	N	N	N	N	N	N	N	N	N	N	N	N	N	N	N	N	N	N	N	N	N	N	N	N	N	N	N	N	N	N	N	N	N	N	N	N	N	N	N
hypothetical-protein-349	N	N	N	N	N	N	N	N	N	N	N	N	N	N	N	N	N	N	N	N	N	N	N	N	N	N	N	N	N	N	N	N	N	N	N	N	N	N	N	N	N	N	N	N	N	N	N	N	N
hypothetical-protein-35	N	N	Y(33688:32978)	N	N	N	N	N	N	N	N	N	N	N	N	Y(94968:95711)	Y(94339:95073)	Y(94959:95693)	Y(94933:95667)	Y(94992:95726)	N	Y(26348:27025)	Y(32531:31803)	N	N	N	N	N	N	N	N	Y(95183:95917)	Y(94828:95562)	Y(93844:94578)	N	N	N	Y(95079:95813)	N	N	N	N	N	N	N	N	Y(116242:116054)	Y(113825:113637)	Y(116552:116364)
hypothetical-protein-350	N	Y(80133:81056)	N	N	N	N	N	N	N	N	N	N	N	N	N	N	N	N	N	N	N	N	N	N	N	N	N	N	N	N	N	N	N	N	N	N	N	N	N	N	N	N	N	N	N	N	N	N	N
hypothetical-protein-351	N	Y(47917:48585)	N	N	N	N	N	N	N	N	N	N	N	N	N	N	N	N	N	N	N	N	N	N	N	N	N	N	N	N	N	N	N	N	N	N	N	N	N	N	N	N	N	N	N	N	N	N	N
hypothetical-protein-352	N	N	N	N	N	N	N	N	N	N	N	N	N	N	N	N	N	N	N	N	N	N	N	N	N	N	N	N	N	N	N	N	N	N	N	N	N	N	N	N	N	N	N	N	N	N	N	N	N
hypothetical-protein-353	N	N	N	N	N	N	N	N	N	N	N	N	N	N	N	N	N	N	N	N	N	N	N	N	N	N	N	N	N	N	N	N	N	N	N	N	N	N	N	N	N	N	N	N	N	N	N	N	N
hypothetical-protein-354	N	Y(67788:68585)	N	N	N	N	N	N	N	N	N	N	N	N	N	N	N	N	N	N	N	N	N	N	N	N	N	N	N	N	N	N	N	N	N	N	N	N	Y(56919:56200)	N	N	N	N	N	N	N	N	N	N
hypothetical-protein-356	N	Y(29973:30539)	N	N	N	N	N	N	N	N	N	N	N	N	N	N	N	N	N	N	N	N	N	N	N	N	N	N	N	N	N	N	N	N	N	N	N	N	N	N	N	N	N	N	N	N	N	N	N
hypothetical-protein-357	N	N	N	N	N	N	N	N	N	N	N	N	N	N	N	N	N	N	N	N	N	N	N	N	N	N	N	N	N	N	N	N	N	N	N	N	N	N	N	N	N	N	N	N	N	N	N	N	N
hypothetical-protein-358	N	Y(22079:19611)	N	N	N	N	N	N	N	N	N	N	N	N	N	N	N	N	N	N	N	N	N	N	N	N	N	N	N	N	N	N	N	N	N	N	N	N	N	N	N	N	N	N	N	N	N	N	N
hypothetical-protein-359	N	Y(9554:11638)	N	N	N	N	N	N	N	N	N	N	N	N	N	N	N	N	N	N	N	N	N	N	N	N	N	N	N	N	N	N	N	N	N	N	N	N	N	N	N	N	N	N	N	N	N	N	N
hypothetical-protein-360	N	N	N	N	N	N	N	N	N	N	N	N	N	N	N	N	N	N	N	N	N	N	N	N	N	N	N	N	N	N	N	N	N	N	N	N	N	N	N	N	N	N	N	N	N	N	N	N	N
hypothetical-protein-361	N	N	N	N	N	N	N	N	N	N	N	N	N	N	N	N	N	N	N	N	N	Y	N	N	N	N	N	N	N	N	N	N	N	N	N	N	N	N	N	N	N	N	N	N	N	N	N	N	N
hypothetical-protein-362	N	Y(11743:12963)	N	N	N	N	N	N	N	N	N	N	N	N	N	N	N	N	N	N	N	N	N	N	N	N	N	N	N	N	N	N	N	N	N	N	N	N	N	N	N	N	N	N	N	N	N	N	N
hypothetical-protein-363	N	N	N	N	N	N	N	N	N	N	N	N	N	N	N	N	N	N	N	N	N	N	N	N	N	N	N	N	N	N	N	N	N	N	N	N	N	N	N	N	N	N	N	N	N	N	N	N	N
hypothetical-protein-364	N	Y(2798:3469)	N	Y(91345:91716)	N	Y(94341:94697)	Y(93649:94005)	Y(101388:101744)	Y(93951:94310)	Y(94210:94569)	Y(94382:94741)	Y(94060:94419)	Y(91887:92258)	Y(87027:87398)	N	N	N	N	N	N	N	N	N	N	N	N	N	N	N	N	N	N	N	N	N	Y(93026:93397)	N	N	N	N	N	N	N	N	N	N	N	N	N
hypothetical-protein-366	N	N	N	N	N	N	N	N	N	N	N	N	N	N	N	N	N	N	N	N	N	N	N	N	N	N	N	N	N	N	N	N	N	N	N	N	N	N	N	N	N	N	N	N	N	N	N	N	N
hypothetical-protein-367	N	Y(47854:47318)	N	N	N	N	N	N	N	N	N	N	N	N	N	N	N	N	N	N	N	N	N	N	N	N	N	N	N	N	N	N	N	N	N	N	N	N	N	N	N	N	N	N	N	N	N	N	N
hypothetical-protein-368	N	N	Y	N	N	N	N	N	N	N	N	N	N	N	N	N	N	N	N	N	N	N	Y	N	N	N	N	N	N	N	N	N	N	N	N	N	N	N	N	N	N	N	N	N	N	N	N	N	N
hypothetical-protein-369	N	N	N	N	N	N	N	N	N	N	N	N	N	N	N	N	N	N	N	N	N	N	N	N	N	N	N	N	N	N	N	N	N	N	N	N	N	N	N	N	N	N	N	N	N	N	N	N	N
hypothetical-protein-37	N	N	Y(105380:104037)	N	N	N	N	N	N	N	N	N	N	N	N	Y(20795:19377)	Y(20835:19417)	Y(20797:19379)	Y(20785:19367)	Y(20841:19423)	N	N	Y(104240:102897)	N	N	N	N	N	N	N	N	Y(20826:19408)	Y(20806:19388)	Y(20775:19384)	N	N	N	Y(20803:19385)	N	N	N	N	N	N	N	N	N	N	N
hypothetical-protein-370	N	Y(27069:25990)	N	N	N	N	N	N	N	N	N	N	N	N	N	N	N	N	N	N	N	N	N	N	N	N	N	N	N	N	N	N	N	N	N	N	N	N	N	N	N	N	N	N	N	N	N	N	N
hypothetical-protein-372	N	N	N	N	N	N	N	N	N	N	N	N	N	N	N	N	N	N	N	N	N	N	N	N	N	N	N	N	N	N	N	N	N	N	N	N	N	N	N	N	N	N	N	N	N	N	N	N	N
hypothetical-protein-373	N	N	N	N	N	N	N	N	N	N	N	N	N	N	N	N	N	N	N	N	N	N	N	N	N	N	N	N	N	N	N	N	N	N	N	N	N	N	N	N	N	N	N	N	N	N	N	N	N
hypothetical-protein-374	N	N	N	N	N	N	N	N	N	N	N	N	N	N	N	N	N	N	N	N	N	N	N	N	N	N	N	N	N	N	N	N	N	N	N	N	N	N	N	N	N	N	N	N	N	N	N	N	N
hypothetical-protein-375	N	N	N	N	N	N	N	N	N	N	N	N	N	N	N	N	N	N	N	N	N	N	N	N	N	N	N	N	N	N	N	N	N	N	N	N	N	N	N	N	N	N	N	N	N	N	N	N	N
hypothetical-protein-376	N	N	N	N	N	N	N	N	N	N	N	N	N	N	N	N	N	N	N	N	N	N	N	N	N	N	N	N	N	N	N	N	N	N	N	N	N	N	N	N	N	N	N	N	N	N	N	N	N
hypothetical-protein-377	N	N	N	N	N	N	N	N	N	N	N	N	N	N	N	N	N	N	N	N	N	N	N	N	N	N	N	N	N	N	N	N	N	N	N	N	N	N	N	N	N	N	N	N	N	N	N	N	N
hypothetical-protein-38	N	N	N	N	Y(74016:74309)	N	N	N	N	N	N	N	N	N	N	N	N	N	N	N	N	N	N	Y(109072:108125)	Y(109449:108502)	Y(109241:108294)	Y(109193:108246)	Y(109000:108053)	Y(73580:73873)	N	Y(87539:87913)	N	N	N	N	N	N	N	N	N	N	N	N	N	N	N	Y(82243:82569)	Y(79706:80032)	Y(82545:82871)
hypothetical-protein-381	N	N	N	N	N	N	N	N	N	N	N	N	N	N	N	N	N	N	N	N	N	N	N	N	N	N	N	N	N	N	N	N	N	N	N	N	N	N	N	N	N	N	N	N	N	N	N	N	N
hypothetical-protein-382	N	N	N	N	N	N	N	N	N	N	N	N	N	N	N	N	N	N	N	N	N	N	N	N	N	N	N	N	N	N	Y(131065:131415)	N	N	N	N	N	N	N	N	N	N	N	N	N	N	N	N	N	N
hypothetical-protein-384	N	N	N	N	N	N	N	N	N	N	N	N	N	N	N	N	N	N	N	N	N	N	N	N	N	N	N	N	N	N	N	N	N	N	N	N	N	N	N	N	N	N	N	N	N	N	N	N	N
hypothetical-protein-385	N	N	N	N	N	N	N	N	N	N	N	N	N	N	N	Y	Y	Y	Y	Y	N	Y	N	N	N	N	N	N	N	N	Y	Y	Y	Y	N	N	N	Y	N	N	N	N	N	N	N	N	N	N	N
hypothetical-protein-386	N	N	N	N	N	N	N	N	N	N	N	N	N	N	N	N	N	N	N	N	N	N	N	N	N	N	N	N	N	N	N	N	N	N	N	N	N	N	N	N	N	N	N	N	N	N	N	N	N
hypothetical-protein-387	N	N	N	N	N	N	N	N	N	N	N	N	N	N	N	N	N	N	N	N	N	N	N	N	N	N	N	N	N	N	N	N	N	N	N	N	N	N	N	N	N	N	N	N	N	N	N	N	N
hypothetical-protein-388	N	N	N	N	N	N	N	N	N	N	N	N	N	N	N	N	N	N	N	N	N	N	N	N	N	N	N	N	N	N	N	N	N	N	N	N	N	N	N	N	N	N	N	N	N	N	N	N	N
hypothetical-protein-389	N	N	N	N	N	N	N	N	N	N	N	N	N	N	N	N	N	N	N	N	N	N	N	N	N	N	N	N	N	N	N	N	N	N	N	N	N	N	N	N	N	N	N	N	N	N	N	N	N
hypothetical-protein-390	N	N	N	N	N	N	N	N	N	N	N	N	N	N	N	N	N	N	N	N	N	N	N	N	N	N	N	N	N	N	N	N	N	N	N	N	N	N	N	N	N	N	N	N	N	N	N	N	N
hypothetical-protein-391	N	N	N	N	N	N	N	N	N	N	N	N	N	N	N	N	N	N	N	N	N	N	N	N	N	N	N	N	N	N	N	N	N	N	N	N	N	N	N	N	N	N	N	N	N	N	N	N	N
hypothetical-protein-392	N	N	N	N	N	N	N	N	N	N	N	N	N	N	N	N	N	N	N	N	N	N	N	N	N	N	N	N	N	N	N	N	N	N	N	N	N	N	N	N	N	N	N	N	N	N	N	N	N
hypothetical-protein-393	N	N	N	N	N	N	N	N	N	N	N	N	N	N	N	N	N	N	N	N	N	N	N	N	N	N	N	N	N	N	N	N	N	N	N	N	N	N	N	N	N	N	N	N	N	N	N	N	N
hypothetical-protein-394	N	N	N	N	N	N	N	N	N	N	N	N	N	N	N	N	N	N	N	N	N	N	N	N	N	N	N	N	N	N	Y(129521:127947)	N	N	N	N	N	N	N	N	N	N	N	N	N	N	N	N	N	N
hypothetical-protein-395	N	N	N	N	N	N	N	N	N	N	N	N	N	N	N	N	N	N	N	N	N	N	N	N	N	N	N	N	N	N	N	N	N	N	N	N	N	N	N	N	N	N	N	N	N	N	N	N	N
hypothetical-protein-396	N	N	N	N	N	N	N	N	N	N	N	N	N	N	N	N	N	N	N	N	N	N	N	N	N	N	N	N	N	N	N	N	N	N	N	N	N	N	N	N	N	N	N	N	N	N	N	N	N
hypothetical-protein-397	N	N	N	N	N	N	N	N	N	N	N	N	N	N	N	N	N	N	N	N	Y	N	N	N	N	N	N	N	N	N	N	N	N	N	N	N	N	N	N	N	N	N	N	N	Y	N	N	N	N
hypothetical-protein-398	N	N	N	N	N	N	N	N	N	N	N	N	N	N	N	N	N	N	N	N	N	N	N	N	N	N	N	N	N	N	N	N	N	N	N	N	N	N	N	N	N	N	N	N	N	N	N	N	N
hypothetical-protein-399	N	N	N	N	N	N	N	N	N	N	N	N	N	N	N	N	N	N	N	N	N	N	Y	N	N	N	N	N	N	Y	N	N	N	N	N	N	N	N	Y	N	N	N	N	N	N	N	N	N	N
hypothetical-protein-40	N	N	N	N	Y(48551:48108)	N	N	N	N	N	N	N	N	N	N	N	N	N	N	N	N	N	N	N	N	N	N	N	Y(48105:47662)	N	Y(61028:60561)	N	N	N	N	N	N	N	N	N	N	N	N	N	N	N	Y(51435:50926)	Y(51356:50916)	Y(51636:51067)
hypothetical-protein-400	N	N	N	N	N	N	N	N	N	N	N	N	Y(103204:102851)	Y(98344:97991)	N	N	N	N	N	N	N	N	N	N	N	N	N	N	N	N	N	N	N	N	N	N	N	N	N	N	N	N	N	N	N	N	N	N	N
hypothetical-protein-401	Y	N	N	N	N	N	N	N	N	N	N	N	N	N	N	N	N	N	N	N	Y	N	N	N	N	N	N	N	N	N	N	N	N	N	N	N	N	N	Y	N	N	N	N	N	Y	N	N	N	N
hypothetical-protein-402	N	N	N	N	N	N	N	N	N	N	N	N	N	N	N	N	N	N	N	N	N	N	N	N	N	N	N	N	N	N	N	N	N	N	N	N	N	N	N	N	N	N	N	N	N	N	N	N	N
hypothetical-protein-403	N	N	N	N	N	N	N	N	N	N	N	N	N	N	N	N	N	N	N	N	N	N	N	N	N	N	N	N	N	N	N	N	N	N	N	N	N	N	N	N	N	N	N	N	N	N	Y	Y	Y
hypothetical-protein-404	N	N	N	N	N	N	N	N	N	N	N	N	N	N	N	N	N	N	N	N	N	N	N	N	N	N	N	N	N	N	N	N	N	N	N	N	N	N	N	N	N	N	N	N	N	N	N	N	N
hypothetical-protein-405	N	N	N	N	N	N	N	N	N	N	N	N	N	N	N	N	N	N	N	N	N	N	N	N	N	N	N	N	N	N	N	N	N	N	N	N	N	N	N	N	N	N	N	N	N	N	N	N	N
hypothetical-protein-406	N	N	N	N	N	N	N	N	N	N	N	N	N	N	N	N	N	N	N	N	Y	N	N	N	N	N	N	N	N	N	N	N	N	N	N	N	N	N	N	N	N	N	N	N	Y	N	N	N	N
hypothetical-protein-407	N	N	N	N	N	N	N	N	N	N	N	N	N	N	N	N	N	N	N	N	N	N	N	N	N	N	N	N	N	N	N	N	N	N	N	N	N	N	N	N	N	N	N	N	N	N	N	N	N
hypothetical-protein-408	Y(22369:23181)	N	N	Y(121060:120170)	N	N	N	N	N	N	N	N	Y(121490:120600)	Y(116570:115680)	N	N	N	N	N	N	Y(22068:22877)	N	N	N	N	N	N	N	N	N	N	N	N	N	N	Y(122733:121843)	N	N	N	N	N	N	N	N	Y(21061:21870)	N	N	N	N
hypothetical-protein-409	N	N	N	N	N	Y	Y	Y	Y	Y	Y	Y	N	N	N	N	N	N	N	N	N	N	N	N	N	N	N	N	N	N	N	N	N	N	N	N	N	N	N	N	N	N	N	N	N	N	N	N	N
hypothetical-protein-410	N	N	N	N	N	N	N	N	N	N	N	N	N	N	N	N	N	N	N	N	N	N	N	N	N	N	N	N	N	N	Y	N	N	N	N	N	N	N	N	N	N	N	N	N	N	N	N	N	N
hypothetical-protein-411	N	N	N	N	N	N	N	N	N	N	N	N	N	N	N	N	N	N	N	N	N	N	N	N	N	N	N	N	N	N	N	N	N	N	N	N	N	N	N	N	N	N	N	N	N	N	N	N	N
hypothetical-protein-412	Y(30852:30499)	N	N	N	N	Y(18517:18972)	Y(17934:18389)	Y(17952:18407)	Y(18162:18617)	Y(18530:18985)	Y(18545:19000)	Y(18282:18737)	N	N	N	N	N	N	N	N	Y(29705:29358)	N	N	Y(133895:134497)	Y(134285:134878)	Y(133286:133879)	Y(133245:133838)	Y(133834:134427)	N	Y(10573:10250)	N	N	N	N	Y(120544:120942)	N	N	N	Y(123916:123560)	N	N	N	N	N	Y(28974:28705)	N	N	N	N
hypothetical-protein-413	N	N	N	N	N	N	N	N	N	N	N	N	N	N	N	N	N	N	N	N	N	N	N	N	N	N	N	N	N	N	N	N	N	N	N	N	N	N	N	N	N	N	N	N	N	N	N	N	N
hypothetical-protein-414	N	N	N	N	N	N	N	N	N	N	N	N	N	N	N	N	N	N	N	N	N	N	N	N	N	N	N	N	N	N	N	N	N	N	N	N	N	N	N	N	N	N	N	N	N	N	N	N	N
hypothetical-protein-415	N	N	N	N	N	N	N	N	N	N	N	N	N	N	N	N	N	N	N	N	N	N	N	N	N	N	N	N	N	N	N	N	N	N	N	N	N	N	N	N	N	N	N	N	N	N	N	N	N
hypothetical-protein-416	N	N	N	N	N	N	N	N	N	N	N	N	N	N	N	N	N	N	N	N	N	N	N	N	N	N	N	N	N	N	N	N	N	N	N	N	N	N	N	N	N	N	N	N	N	N	N	N	N
hypothetical-protein-417	N	N	N	N	N	N	N	N	N	N	N	N	N	N	N	N	N	N	N	N	N	N	N	N	N	N	N	N	N	N	N	N	N	N	N	N	N	N	N	N	N	N	N	N	N	N	N	N	N
hypothetical-protein-419	N	N	N	N	N	N	N	N	N	N	N	N	N	N	N	N	N	N	N	N	N	N	N	N	N	N	N	N	N	N	N	N	N	N	N	N	N	N	N	N	N	N	N	N	N	N	N	N	N
hypothetical-protein-42	N	N	N	N	N	N	N	N	N	N	N	N	N	N	N	N	N	N	N	N	N	N	N	N	N	N	N	N	N	N	Y(34479:34730)	N	N	N	N	N	N	N	N	N	N	N	N	N	N	N	Y(34764:35012)	Y(34776:35024)	Y(34928:35176)
hypothetical-protein-420	N	N	N	N	N	N	N	N	N	N	N	N	N	N	N	N	N	N	N	N	N	N	N	N	N	N	N	N	N	N	N	N	N	N	N	N	N	N	N	N	N	N	N	N	N	N	N	N	N
hypothetical-protein-421	N	N	N	N	N	N	N	N	N	N	N	N	N	N	N	N	N	N	N	N	N	N	N	N	N	N	N	N	N	N	N	N	N	N	N	N	N	N	N	N	N	N	N	N	N	N	N	N	N
hypothetical-protein-422	N	N	N	N	N	N	N	N	N	N	N	N	N	N	N	N	N	N	N	N	N	N	N	N	N	N	N	N	N	N	N	N	N	N	N	N	N	N	N	N	N	N	N	N	N	N	N	N	N
hypothetical-protein-423	N	N	N	Y(4493:3087)	N	Y(5330:3186)	Y(5351:3186)	Y(5351:3186)	Y(5324:3177)	Y(5327:3192)	Y(5342:3195)	Y(5321:3183)	Y(4498:3086)	Y(4498:3086)	N	N	N	N	N	N	N	N	N	N	N	N	N	N	N	N	N	N	N	N	N	Y(4487:3084)	N	N	N	N	N	N	N	N	N	N	N	N	N
hypothetical-protein-424	N	N	N	N	N	N	N	N	N	N	N	N	N	N	N	N	N	N	N	N	N	N	Y(17462:17214)	N	N	N	N	N	N	N	N	N	N	N	N	N	N	N	N	N	N	N	N	N	N	N	N	N	N
hypothetical-protein-425	N	N	N	N	N	N	N	N	N	N	N	N	N	N	N	N	N	N	N	N	N	N	N	N	N	N	N	N	N	N	N	N	N	N	N	N	N	N	N	N	N	N	N	N	N	N	N	N	N
hypothetical-protein-427	N	N	N	N	N	N	N	N	N	N	N	N	N	N	N	N	N	N	N	N	N	N	N	N	N	N	N	N	N	N	N	N	N	N	N	N	N	N	N	N	N	N	N	N	N	N	N	N	N
hypothetical-protein-428	N	N	Y	N	N	N	N	N	N	N	N	N	N	N	N	N	N	N	N	N	N	N	N	N	N	N	N	N	N	N	N	N	N	N	N	N	N	N	N	N	N	N	N	N	N	N	N	N	N
hypothetical-protein-429	N	N	N	N	N	N	N	N	N	N	N	N	N	N	N	N	N	N	N	N	N	N	N	N	N	N	N	N	N	N	N	N	N	N	N	N	N	N	N	N	N	N	N	N	N	N	N	N	N
hypothetical-protein-43	N	N	N	N	Y(19669:20205)	N	N	N	N	N	N	N	N	N	N	N	N	N	N	N	N	N	N	N	N	N	N	N	Y(19668:20204)	N	Y(22381:23472)	N	N	N	N	N	N	N	N	N	N	N	N	N	N	N	Y(24399:24944)	Y(24443:24706)	Y(24629:25174)
hypothetical-protein-432	N	N	N	N	N	N	N	N	N	N	N	N	N	N	N	N	N	N	N	N	N	N	N	N	N	N	N	N	N	N	N	N	N	N	N	N	N	N	N	N	N	N	N	N	N	N	N	N	N
hypothetical-protein-433	N	N	N	N	N	N	N	N	N	N	N	N	N	N	N	N	N	N	N	N	N	N	N	N	N	N	N	N	N	N	N	N	N	N	N	N	N	N	N	N	N	N	N	N	N	N	N	N	N
hypothetical-protein-434	N	N	N	N	N	N	N	N	N	N	N	N	N	N	N	N	N	N	N	N	N	N	N	N	N	N	N	N	N	N	N	N	N	N	N	N	N	N	N	N	N	N	N	N	N	N	N	N	N
hypothetical-protein-435	Y	N	N	N	N	N	N	N	N	N	N	N	N	N	N	N	N	N	N	N	N	N	N	N	N	N	N	N	N	N	N	N	N	N	N	N	N	N	N	N	N	N	N	N	N	N	N	N	N
hypothetical-protein-437	N	N	N	N	N	N	N	N	N	N	N	N	N	N	N	N	N	N	N	N	N	N	N	N	N	N	N	N	N	N	N	N	N	N	N	N	N	N	N	N	N	N	N	N	N	N	N	N	N
hypothetical-protein-439	N	N	N	N	N	N	N	N	N	N	N	N	N	N	N	N	N	N	N	N	N	N	N	N	N	N	N	N	N	N	N	N	N	N	N	N	N	N	N	N	N	N	N	N	N	N	N	N	N
hypothetical-protein-440	N	N	N	N	N	N	N	N	N	N	N	N	N	N	N	N	N	N	N	N	N	N	N	N	N	N	N	N	N	N	N	N	N	N	N	N	N	N	N	N	N	N	N	N	N	N	N	N	N
hypothetical-protein-441	N	Y	N	N	N	N	N	N	N	N	N	N	N	N	N	N	N	N	N	N	N	N	N	N	N	N	N	N	N	N	N	N	N	N	N	N	N	N	N	N	N	N	N	N	N	N	N	N	N
hypothetical-protein-442	N	N	N	N	N	N	N	N	N	N	N	N	N	N	Y	N	N	N	N	N	N	N	N	N	N	N	N	N	N	N	N	N	N	N	N	N	Y	N	N	N	N	N	N	N	N	Y	N	N	N
hypothetical-protein-443	N	N	N	N	N	N	N	N	N	N	N	N	N	N	N	N	N	N	N	N	N	N	N	N	N	N	N	N	N	N	N	N	N	N	N	N	N	N	N	N	N	N	N	N	N	N	N	N	N
hypothetical-protein-444	N	N	N	N	N	N	N	N	N	N	N	N	N	N	N	N	N	N	N	N	N	N	N	N	N	N	N	N	N	N	N	N	N	N	N	N	N	N	N	N	N	N	N	N	N	N	N	N	N
hypothetical-protein-445	N	N	N	N	N	N	N	N	N	N	N	N	N	N	N	N	N	N	N	N	N	N	N	N	N	N	N	N	N	N	N	N	N	N	N	N	N	N	Y	N	N	N	N	N	N	N	N	N	N
hypothetical-protein-446	N	N	N	N	N	N	N	N	N	N	N	N	N	N	N	Y	Y	Y	Y	Y	N	N	N	N	N	N	N	N	N	N	N	Y	Y	Y	N	N	N	Y	N	N	N	N	N	N	N	N	N	N	N
hypothetical-protein-447	N	N	N	N	N	N	N	N	N	N	N	N	N	N	N	N	N	N	N	N	N	N	N	N	N	N	N	N	N	N	N	N	N	N	N	N	N	N	N	N	N	N	N	N	N	N	N	N	N
hypothetical-protein-448	N	N	N	N	N	N	N	N	N	N	N	N	N	N	N	N	N	N	N	N	N	N	N	N	N	N	N	N	N	N	Y(93951:93403)	N	N	N	N	N	N	N	N	N	N	N	N	N	N	N	N	N	N
hypothetical-protein-449	N	N	N	N	N	N	N	N	N	N	N	N	N	N	N	N	N	N	N	N	N	N	N	N	N	N	N	N	N	N	N	N	N	N	N	N	N	N	N	N	N	N	N	N	N	N	N	N	N
hypothetical-protein-45	Y(23938:23303)	N	N	N	Y(28355:27882)	N	N	N	N	N	N	N	N	N	Y(119912:120490)	N	N	N	N	N	Y(23629:22988)	N	N	Y(110423:111010)	Y(110800:111387)	Y(110592:111179)	Y(110547:111134)	Y(110351:110938)	Y(28369:27917)	N	Y(40675:40247)	N	N	N	N	N	Y(119861:120439)	N	N	Y(120850:121428)	Y(119834:120412)	Y(119877:120455)	Y(121392:121970)	Y(121197:121775)	Y(22622:21981)	Y(119373:119993)	Y(36614:36150)	Y(36633:36169)	Y(36778:36314)
hypothetical-protein-450	N	N	N	N	N	N	N	N	N	N	N	N	N	N	N	N	N	N	N	N	N	N	N	N	N	N	N	N	N	N	N	N	N	N	N	N	N	N	N	N	N	N	N	N	N	N	N	N	N
hypothetical-protein-452	N	N	N	N	N	N	N	N	N	N	N	N	N	N	N	N	N	N	N	N	N	N	N	N	N	N	N	N	N	N	N	N	N	N	N	N	N	N	N	N	N	N	N	N	N	N	N	N	N
hypothetical-protein-453	N	N	N	N	N	N	N	N	N	N	N	N	N	N	N	N	N	N	N	N	N	N	N	N	N	N	N	N	N	N	N	N	N	N	N	N	N	N	N	N	N	N	N	N	N	N	N	N	N
hypothetical-protein-454	N	N	N	N	N	N	N	N	N	N	N	N	N	N	N	N	N	N	N	N	N	N	N	N	N	N	N	N	N	N	N	N	N	N	N	N	N	N	N	N	N	N	N	N	N	N	N	N	N
hypothetical-protein-456	N	N	N	N	N	N	N	N	N	N	N	N	N	N	N	N	N	N	N	N	N	N	N	N	N	N	N	N	N	N	N	N	N	N	N	N	N	N	N	N	N	N	N	N	N	N	N	N	N
hypothetical-protein-457	N	N	N	N	N	N	N	N	N	N	N	N	N	N	N	N	N	N	N	N	N	N	N	N	N	N	N	N	N	N	N	N	N	N	N	N	N	N	N	N	N	N	N	N	N	N	N	N	N
hypothetical-protein-458	N	N	N	N	N	N	N	N	N	N	N	N	N	N	N	N	N	N	N	N	N	N	N	N	N	N	N	N	N	N	N	N	N	N	N	N	N	N	N	N	N	N	N	N	N	N	N	N	N
hypothetical-protein-459	N	N	N	N	N	N	N	N	N	N	N	N	N	N	N	N	N	N	N	N	N	N	N	N	N	N	N	N	N	N	N	N	N	N	N	N	N	N	N	N	N	N	N	N	N	N	N	N	N
hypothetical-protein-46	N	N	Y(74343:73615)	N	Y(58029:57448)	N	N	N	N	N	N	N	N	N	N	N	N	N	N	N	N	N	N	N	N	N	N	N	Y(57607:57026)	N	Y(70429:69551)	N	N	N	N	N	N	N	N	N	N	N	N	N	N	N	Y(65339:64647)	Y(62646:61954)	Y(65465:64773)
hypothetical-protein-460	N	N	Y	N	Y	Y	Y	Y	Y	Y	Y	Y	N	N	N	N	N	N	N	N	Y	Y	Y	N	N	N	N	N	N	N	N	N	N	N	Y	N	N	N	Y(33504:34118)	N	N	N	N	N	Y	N	Y	Y	Y
hypothetical-protein-461	N	N	N	N	N	N	N	N	N	N	N	N	N	N	N	N	N	N	N	N	N	N	N	N	N	N	N	N	N	N	Y(6008:5196)	N	N	N	N	N	N	N	N	N	N	N	N	N	N	N	N	N	N
hypothetical-protein-462	N	N	N	N	N	N	N	N	N	N	N	N	N	N	N	N	N	N	N	N	N	N	N	N	N	N	N	N	N	N	Y(20031:20246)	N	N	N	N	N	N	N	N	N	N	N	N	N	N	N	N	N	N
hypothetical-protein-463	N	N	N	N	N	N	N	N	N	N	N	N	N	N	N	N	N	N	N	N	N	N	N	N	N	N	N	N	N	N	Y(20404:20577)	N	N	N	N	N	N	N	N	N	N	N	N	N	N	N	N	N	N
hypothetical-protein-464	N	N	N	N	N	N	N	N	N	N	N	N	N	N	N	N	N	N	N	N	N	N	N	N	N	N	N	N	N	N	Y(25672:25346)	N	N	N	N	N	N	N	N	N	N	N	N	N	N	N	N	N	N
hypothetical-protein-465	N	N	N	N	N	N	N	N	N	N	N	N	N	N	N	N	N	N	N	N	N	N	N	N	N	N	N	N	N	N	N	N	N	N	N	N	N	N	N	N	N	N	N	N	N	N	N	N	N
hypothetical-protein-466	N	N	N	N	N	N	N	N	N	N	N	N	N	N	N	N	N	N	N	N	Y	N	N	N	N	N	N	N	N	N	Y(43079:43264)	N	N	N	N	N	N	N	N	N	N	N	N	N	Y	N	N	N	N
hypothetical-protein-467	N	N	N	N	N	N	N	N	N	N	N	N	N	N	N	N	N	N	N	N	N	N	N	N	N	N	N	N	N	N	Y(44732:44460)	N	N	N	N	N	N	N	N	N	N	N	N	N	N	N	N	N	N
hypothetical-protein-468	N	N	N	N	N	N	N	N	N	N	N	N	N	N	N	N	N	N	N	N	N	N	N	N	N	N	N	N	N	N	Y(52005:51838)	N	N	N	N	N	N	N	N	N	N	N	N	N	N	N	N	N	N
hypothetical-protein-469	N	N	N	N	Y(33810:36221)	N	N	N	N	N	N	N	N	N	N	N	N	N	N	N	N	N	N	N	N	N	N	N	Y(33845:36256)	N	Y(53808:53533)	N	N	N	N	N	N	N	N	N	N	N	N	N	N	N	Y(40612:43929)	Y(40607:42469)	Y(40773:44090)
hypothetical-protein-470	N	N	N	N	N	N	N	N	N	N	N	N	N	N	N	N	N	N	N	N	N	N	N	N	N	N	N	N	N	N	Y(57109:56696)	N	N	N	N	N	N	N	N	N	N	N	N	N	N	N	N	N	N
hypothetical-protein-471	N	N	N	N	N	N	N	N	N	N	N	N	N	N	N	N	N	N	N	N	N	N	N	N	N	N	N	N	N	Y(46367:46663)	N	N	N	N	N	N	N	N	N	N	N	N	N	N	N	N	N	N	N
hypothetical-protein-472	N	N	N	N	N	N	N	N	N	N	N	N	N	N	N	N	N	N	N	N	N	Y(20688:20951)	N	N	N	N	N	N	N	N	N	N	N	N	N	N	N	N	N	N	N	N	N	N	N	N	N	N	N
hypothetical-protein-473	N	N	N	N	N	N	N	N	N	N	N	N	N	N	N	N	N	N	N	N	N	Y(40500:40889)	N	N	N	N	N	N	N	N	Y	N	N	N	N	N	N	N	N	N	N	N	N	N	N	N	N	N	N
hypothetical-protein-474	N	N	N	N	N	N	N	N	N	N	N	N	N	N	N	N	N	N	N	N	N	Y(133166:132366)	N	N	N	N	N	N	N	N	N	N	N	N	N	N	N	N	N	N	N	N	N	N	N	N	N	N	N
hypothetical-protein-475	N	N	N	N	N	N	N	N	N	N	N	N	Y(54862:54701)	Y(50002:49841)	N	N	N	N	N	N	N	N	N	N	N	N	N	N	N	N	N	N	N	N	N	N	N	N	N	N	N	N	N	N	N	N	N	N	N
hypothetical-protein-476	N	Y(16698:15871)	N	N	N	N	N	N	N	N	N	N	N	N	N	N	N	N	N	N	N	N	N	N	N	N	N	N	N	N	N	N	N	N	N	N	N	N	N	N	N	N	N	N	N	N	N	N	N
hypothetical-protein-477	N	Y(17596:16913)	N	N	N	N	N	N	N	N	N	N	N	N	N	N	N	N	N	N	N	N	N	N	N	N	N	N	N	N	N	N	N	N	N	N	N	N	N	N	N	N	N	N	N	N	N	N	N
hypothetical-protein-478	N	Y(18267:17758)	N	N	N	N	N	N	N	N	N	N	N	N	N	N	N	N	N	N	N	Y(128743:129867)	N	Y(121169:122293)	Y(121552:122676)	Y(120560:121684)	Y(120516:121640)	Y(121102:122226)	N	Y(120306:119173)	N	N	N	N	N	N	N	N	Y(105634:106980)	N	N	N	N	N	N	N	N	N	N
hypothetical-protein-479	N	Y(24467:24868)	N	N	N	N	N	N	N	N	N	N	N	N	N	N	N	N	N	N	N	N	N	N	N	N	N	N	N	N	N	N	N	N	N	N	N	N	N	N	N	N	N	N	N	N	N	N	N
hypothetical-protein-48	N	N	N	N	N	Y(24033:25421)	Y(23449:24837)	Y(31169:32557)	Y(23677:25065)	Y(24066:25454)	Y(24082:25467)	Y(23798:25186)	N	N	Y(100568:101941)	N	N	N	N	N	N	N	N	N	N	N	N	N	N	N	Y(38643:39911)	N	N	N	N	Y(22702:24090)	Y(100809:102182)	N	N	Y(101390:102763)	Y(100353:101726)	Y(100421:101794)	Y(101939:103312)	Y(101752:103125)	N	Y(100363:101736)	N	N	N
hypothetical-protein-481	N	Y(37371:36418)	N	N	N	N	N	N	N	N	N	N	N	N	N	N	N	N	N	N	N	N	N	Y	Y	Y	Y	Y	N	N	N	N	N	N	N	N	N	N	N	N	N	N	N	N	N	N	N	N	N
hypothetical-protein-482	N	Y(71219:71485)	N	N	N	N	N	N	N	N	N	N	N	N	N	N	N	N	N	N	N	N	N	N	N	N	N	N	N	N	N	N	N	N	N	N	N	N	N	N	N	N	N	N	N	N	N	N	N
hypothetical-protein-483	N	Y(81101:82480)	N	N	N	N	N	N	N	N	N	N	N	N	N	N	N	N	N	N	N	N	N	N	N	N	N	N	N	N	N	N	N	N	N	N	N	N	N	N	N	N	N	N	N	N	N	N	N
hypothetical-protein-485	N	N	N	N	Y(95182:95496)	N	N	N	N	N	N	N	N	N	N	N	N	N	N	N	N	N	N	N	N	N	N	N	Y(94748:95062)	N	N	N	N	N	N	N	N	N	N	N	N	N	N	N	N	N	Y(105664:105963)	Y(103197:103496)	Y(105973:106272)
hypothetical-protein-486	Y(135409:135990)	N	N	Y(112196:112747)	N	Y(115308:115883)	Y(114630:115205)	Y(122366:122941)	Y(114944:115519)	Y(115205:115780)	Y(115376:115951)	Y(115052:115627)	Y(112754:113305)	Y(107894:108445)	N	N	N	N	N	N	Y(136197:136769)	N	N	Y(30792:30202)	Y(31060:30470)	Y(30962:30372)	Y(30745:30155)	Y(30556:29966)	N	N	N	N	N	N	N	Y(113852:114403)	N	N	N	N	N	N	N	N	Y(135641:135913)	N	N	N	N
hypothetical-protein-487	N	N	N	Y(111522:112148)	N	Y(114515:115192)	Y(113837:114514)	Y(121573:122250)	Y(114151:114828)	Y(114415:115092)	Y(114583:115260)	Y(114262:114939)	Y(112080:112706)	Y(107220:107846)	N	N	N	N	N	N	N	N	N	N	N	N	N	N	N	N	N	N	N	N	N	Y(113178:113804)	N	N	N	N	N	N	N	N	N	N	N	N	N
hypothetical-protein-488	N	N	N	N	N	N	N	N	N	N	N	N	N	N	N	N	N	N	N	N	N	N	N	N	N	N	N	N	N	N	N	N	N	N	N	N	N	N	N	N	N	N	N	N	N	N	N	N	N
hypothetical-protein-489	N	N	N	N	N	N	N	N	N	N	N	N	N	N	N	N	N	N	N	N	N	N	N	N	N	N	N	N	N	N	N	N	N	N	N	N	N	N	N	N	N	N	N	N	N	N	N	N	N
hypothetical-protein-49	N	N	N	N	Y(55402:55103)	N	N	N	N	N	N	N	N	N	N	N	N	N	N	N	N	N	N	N	N	N	N	N	Y(54955:54656)	N	Y(67730:67332)	N	N	N	N	N	N	N	N	N	N	N	N	N	N	N	Y(62456:62151)	Y(59764:59459)	Y(62582:62271)
hypothetical-protein-490	N	N	N	N	N	N	N	N	N	N	N	N	N	N	N	N	N	N	N	N	N	N	N	N	N	N	N	N	N	N	N	N	N	N	N	N	N	N	N	N	N	N	N	N	N	N	Y(57116:56541)	Y(54379:53801)	Y(57080:56526)
hypothetical-protein-491	N	N	N	N	N	N	N	N	N	N	N	N	N	N	N	N	N	N	N	N	N	N	N	N	N	N	N	N	N	N	N	N	N	N	N	N	N	N	N	N	N	N	N	N	N	N	N	N	N
hypothetical-protein-492	N	N	N	N	N	N	N	N	N	N	N	N	N	N	N	N	N	N	N	N	N	N	N	N	N	N	N	N	N	N	N	N	N	N	N	N	N	N	N	N	N	N	N	N	N	N	N	N	N
hypothetical-protein-494	N	N	N	N	Y(47276:46701)	N	N	N	N	N	N	N	N	N	N	N	N	N	N	N	N	N	N	N	N	N	N	N	Y(46830:46348)	N	N	N	N	N	N	N	N	N	N	N	N	N	N	N	N	N	N	N	N
hypothetical-protein-495	N	N	Y(106449:105955)	N	N	N	N	N	N	N	N	N	N	N	N	N	N	N	N	N	N	N	Y(105260:104865)	N	N	N	N	N	N	N	N	N	N	N	N	N	N	N	N	N	N	N	N	N	N	N	N	N	N
hypothetical-protein-496	Y(52747:51722)	N	N	N	N	N	N	N	N	N	N	N	N	N	N	N	N	N	N	N	Y(51546:50539)	N	N	N	N	N	N	N	N	N	N	N	N	N	N	N	N	N	N	N	N	N	N	N	Y(50867:49818)	N	N	N	N
hypothetical-protein-497	N	N	N	N	N	N	N	N	N	N	N	N	N	N	N	N	N	N	N	N	N	N	N	N	N	N	N	N	N	N	N	N	N	N	N	N	N	N	N	N	N	N	N	N	N	N	N	N	N
hypothetical-protein-498	N	N	N	N	N	N	N	N	N	N	N	N	N	N	N	N	N	N	N	N	N	N	N	N	N	N	N	N	N	N	N	N	N	N	N	N	N	N	N	N	N	N	N	N	N	N	N	N	N
hypothetical-protein-499	N	N	N	N	N	N	N	N	N	N	N	N	N	N	N	N	N	N	N	N	N	N	N	N	N	N	N	N	N	N	N	N	N	N	N	N	N	N	N	N	N	N	N	N	N	N	N	N	N
hypothetical-protein-50	N	N	N	N	Y(93643:93858)	N	N	N	N	N	N	N	N	N	N	Y(67450:66653)	Y(66777:65974)	Y(67455:66655)	Y(67313:66510)	N	N	N	N	N	N	N	N	N	Y(93210:93425)	N	N	Y(67798:66998)	Y(67344:66544)	Y(66460:65657)	N	N	N	Y(66752:65955)	N	N	N	N	N	N	N	N	Y(104019:104219)	Y(101556:101753)	Y(104328:104528)
hypothetical-protein-500	N	N	N	N	N	N	N	N	N	N	N	N	N	N	N	N	N	N	N	N	N	N	N	N	N	N	N	N	N	N	N	N	N	N	N	N	N	N	N	N	N	N	N	N	N	N	N	N	N
hypothetical-protein-501	N	N	N	N	N	N	N	N	N	N	N	N	N	N	N	N	N	N	N	N	N	N	N	N	N	N	N	N	N	N	N	N	N	N	N	N	N	N	N	N	N	N	N	N	N	N	N	N	N
hypothetical-protein-502	N	N	N	N	N	N	N	N	N	N	N	N	N	N	N	N	N	N	N	N	N	N	N	N	N	N	N	N	N	N	N	N	N	N	Y(149001:148165)	N	N	N	N	N	N	N	N	N	N	N	N	N	N
hypothetical-protein-503	N	N	N	N	N	N	N	N	N	N	N	N	N	N	N	N	Y(104391:104224)	Y(105000:104833)	N	N	N	N	N	N	N	N	N	N	N	N	N	N	N	N	N	N	N	N	N	N	N	N	N	N	N	N	N	N	N
hypothetical-protein-504	Y(46416:46610)	N	N	N	N	N	N	N	N	N	N	N	N	N	N	N	N	N	N	N	N	N	N	N	N	N	N	N	N	N	N	N	N	N	N	N	N	N	N	N	N	N	N	N	N	N	N	N	N
hypothetical-protein-505	N	N	N	N	N	N	N	N	N	N	N	N	N	N	N	N	N	N	N	N	N	N	N	N	N	N	N	N	N	N	Y(106012:105164)	N	N	N	N	N	N	N	N	N	N	N	N	N	N	N	N	N	N
hypothetical-protein-506	N	N	N	N	N	N	N	N	N	N	N	N	N	N	N	N	N	N	N	N	N	N	Y(123486:123073)	N	N	N	N	N	N	N	N	N	N	N	N	N	N	N	N	N	N	N	N	N	N	N	N	N	N
hypothetical-protein-507	N	N	N	N	N	N	N	N	N	N	N	N	N	N	N	N	N	N	N	N	N	N	N	N	N	N	N	N	N	N	N	N	N	N	N	N	N	N	N	N	N	N	N	N	N	N	N	N	N
hypothetical-protein-508	N	N	N	N	N	N	N	N	N	N	N	N	N	N	N	N	N	N	N	N	N	N	N	N	N	N	N	N	N	N	N	N	N	N	N	N	N	N	N	N	N	N	N	N	N	N	N	N	N
hypothetical-protein-51	N	N	N	N	N	N	N	N	N	N	N	N	N	N	N	N	N	N	N	N	N	N	Y(104239:104796)	N	N	N	N	N	N	N	N	N	N	N	N	N	N	N	N	N	N	N	N	N	N	N	N	N	N
hypothetical-protein-510	N	N	N	N	N	N	N	N	N	N	N	N	N	N	N	N	N	N	N	N	N	N	N	N	N	N	N	N	N	N	N	N	N	N	N	N	N	N	N	N	N	N	N	N	N	N	N	N	N
hypothetical-protein-512	N	N	N	N	N	N	N	N	N	N	N	N	N	N	N	N	N	N	N	N	N	N	N	N	N	N	N	N	N	N	N	N	N	N	N	N	N	N	N	N	N	N	N	N	N	N	N	N	N
hypothetical-protein-513	N	N	N	N	N	N	N	N	N	N	N	N	N	N	N	N	N	N	N	N	N	N	N	N	N	N	N	N	N	N	N	N	N	N	N	N	N	N	N	N	N	N	N	N	N	N	N	N	N
hypothetical-protein-514	N	N	N	N	N	N	N	N	N	N	N	N	N	N	N	N	N	N	N	N	N	N	N	N	N	N	N	N	N	N	N	N	N	N	N	N	N	N	N	N	N	N	N	N	N	N	N	N	N
hypothetical-protein-515	N	N	N	N	N	N	N	N	N	N	N	N	N	N	N	N	N	N	N	N	N	N	N	N	N	N	N	N	N	N	N	N	N	N	N	N	N	N	N	N	N	N	N	N	N	N	N	N	N
hypothetical-protein-516	N	N	N	N	N	N	N	N	N	N	N	N	N	N	N	N	N	N	N	N	N	N	N	N	N	N	N	N	N	N	N	N	N	N	N	N	N	N	N	N	N	N	N	N	N	N	N	N	N
hypothetical-protein-517	N	N	N	N	N	N	N	N	N	N	N	N	N	N	N	N	N	N	N	N	N	N	N	N	N	N	N	N	N	N	N	N	N	N	N	N	N	N	N	N	N	N	N	N	N	N	N	N	N
hypothetical-protein-518	N	N	N	N	N	N	N	N	N	N	N	N	N	N	N	N	N	N	N	N	N	N	N	N	N	N	N	N	N	N	N	N	N	N	N	N	N	N	N	N	N	N	N	N	N	N	N	N	N
hypothetical-protein-519	N	N	N	N	N	N	N	N	N	N	N	N	N	N	N	N	N	N	N	N	N	N	N	N	N	N	N	N	N	N	N	N	N	N	N	N	N	N	N	N	N	N	N	N	N	N	N	N	N
hypothetical-protein-52	N	N	Y(125759:126145)	N	N	N	N	N	N	N	N	N	N	N	N	N	N	N	N	N	N	N	Y(124890:125294)	N	N	N	N	N	Y(33833:33624)	N	Y(45025:44831)	N	N	N	N	N	N	N	N	N	N	N	N	N	N	N	Y(40676:40287)	Y(40671:40282)	Y(40837:40448)
hypothetical-protein-520	N	N	N	N	N	N	N	N	N	N	N	N	N	N	N	N	N	N	N	N	N	N	N	N	N	N	N	N	N	N	N	N	N	N	N	N	N	N	N	N	N	N	N	N	N	N	N	N	N
hypothetical-protein-521	N	N	N	N	N	N	N	N	N	N	N	N	N	N	N	N	N	N	N	N	N	N	N	N	N	N	N	N	N	N	N	N	N	N	N	N	N	N	N	N	N	N	N	N	N	N	N	N	N
hypothetical-protein-522	N	N	N	N	N	N	N	N	N	N	N	N	N	N	N	N	N	N	N	N	N	N	N	N	N	N	N	N	N	N	N	N	N	N	N	N	N	N	N	N	N	N	N	N	N	N	N	N	N
hypothetical-protein-523	N	N	N	N	N	N	N	N	N	N	N	N	N	N	N	N	N	N	N	N	N	N	N	N	N	N	N	N	N	N	N	N	N	N	N	N	N	N	N	N	N	N	N	N	N	N	N	N	N
hypothetical-protein-524	N	N	N	N	N	N	N	N	N	N	N	N	N	N	N	N	N	N	N	N	N	N	N	N	N	N	N	N	N	N	N	N	N	N	N	N	N	N	N	N	N	N	N	N	N	N	N	N	N
hypothetical-protein-525	N	N	N	N	N	N	N	N	N	N	N	N	N	N	N	N	N	N	N	N	N	N	N	N	N	N	N	N	N	N	N	N	N	N	N	N	N	N	N	N	N	N	N	N	N	N	N	N	N
hypothetical-protein-526	N	N	N	N	N	N	N	N	N	N	N	N	N	N	N	N	N	N	N	N	N	N	N	N	N	N	N	N	N	N	N	N	N	N	N	N	N	N	N	N	N	N	N	N	N	N	N	N	N
hypothetical-protein-527	N	N	N	N	N	N	N	N	N	N	N	N	N	N	N	N	N	N	N	N	N	N	N	N	N	N	N	N	N	N	N	N	N	N	N	N	N	N	N	N	N	N	N	N	N	N	N	N	N
hypothetical-protein-528	N	N	N	N	N	N	N	N	N	N	N	N	N	N	N	N	N	N	N	N	N	N	N	N	N	N	N	N	N	N	N	N	N	N	N	N	N	N	N	N	N	N	N	N	N	N	N	N	N
hypothetical-protein-529	N	N	N	N	N	N	N	N	N	N	N	N	N	N	N	N	N	N	N	N	N	N	N	N	N	N	N	N	N	N	N	N	N	N	N	N	N	N	N	N	N	N	N	N	N	N	N	N	N
hypothetical-protein-53	N	N	N	N	Y(24967:24374)	N	N	N	N	N	N	N	N	N	N	N	N	N	N	N	Y	N	N	N	N	N	N	N	Y(24977:24408)	N	Y(27903:27328)	N	N	N	Y	N	N	N	Y	N	N	N	N	N	Y	N	Y(30181:29567)	Y(30179:29490)	Y(30353:29664)
hypothetical-protein-530	N	N	N	N	N	N	N	N	N	N	N	N	N	N	N	N	N	N	N	N	N	N	N	N	N	N	N	N	N	N	N	N	N	N	N	N	N	N	N	N	N	N	N	N	N	N	N	N	N
hypothetical-protein-531	N	N	N	N	N	N	N	N	N	N	N	N	N	N	N	N	N	N	N	N	N	N	N	N	N	N	N	N	N	N	N	N	N	N	N	N	N	N	N	N	N	N	N	N	N	N	N	N	N
hypothetical-protein-532	N	N	N	N	N	N	N	N	N	N	N	N	N	N	N	N	N	N	N	N	N	N	N	N	N	N	N	N	N	N	N	N	N	N	N	N	N	N	N	N	N	N	N	N	N	N	N	N	N
hypothetical-protein-533	N	N	N	N	N	N	N	N	N	N	N	N	N	N	N	N	N	N	N	N	N	N	N	N	N	N	N	N	N	N	N	N	N	N	N	N	N	N	N	N	N	N	N	N	N	N	N	N	N
hypothetical-protein-534	N	N	N	N	N	N	N	N	N	N	N	N	N	N	N	N	N	N	N	N	N	N	N	N	N	N	N	N	N	N	N	N	N	N	N	N	N	N	N	N	N	N	N	N	N	N	N	N	N
hypothetical-protein-535	N	N	N	N	N	N	N	N	N	N	N	N	N	N	N	N	N	N	N	N	N	N	N	N	N	N	N	N	N	N	N	N	N	N	N	N	N	N	N	N	N	N	N	N	N	N	N	N	N
hypothetical-protein-536	N	N	N	N	N	N	N	N	N	N	N	N	N	N	N	N	N	N	N	N	N	N	N	N	N	N	N	N	N	N	N	N	N	N	N	N	N	N	N	N	N	N	N	N	N	N	Y(76705:76424)	N	N
hypothetical-protein-537	N	N	N	N	N	N	N	N	N	N	N	N	Y(38924:39115)	Y(34064:34255)	N	N	N	N	N	N	N	N	N	N	N	N	N	N	N	N	N	N	N	N	N	N	N	N	N	N	N	N	N	N	N	N	N	N	N
hypothetical-protein-538	N	N	N	N	N	N	N	N	N	N	N	N	N	N	N	N	N	N	N	N	N	N	N	N	N	N	N	N	N	N	N	N	N	N	Y(10644:11207)	N	N	N	N	N	N	N	N	N	N	N	N	N	N
hypothetical-protein-54	N	N	Y(107163:106459)	N	N	N	N	N	N	N	N	N	N	N	N	N	N	N	N	N	N	N	Y(105974:105270)	N	N	N	N	N	N	N	N	N	N	N	N	N	N	N	N	N	N	N	N	N	N	N	N	N	N
hypothetical-protein-55	N	N	Y(3495:3265)	N	N	N	N	N	N	N	N	N	N	N	N	N	N	N	N	N	N	N	Y(3495:3265)	N	N	N	N	N	N	N	N	N	N	N	N	N	N	N	N	N	N	N	N	N	N	N	N	N	N
hypothetical-protein-56	N	N	N	Y(114776:115114)	N	Y(117970:118290)	Y(117301:117621)	Y(125037:125357)	Y(117606:117926)	Y(117867:118187)	Y(118035:118355)	Y(117714:118034)	Y(115334:115753)	Y(110474:110893)	N	N	N	N	N	N	N	N	N	N	N	N	N	N	N	N	N	N	N	N	N	Y(116432:116770)	N	N	N	N	N	N	N	N	N	N	N	N	N
hypothetical-protein-57	N	N	N	Y(42598:43389)	N	N	N	N	N	N	N	N	Y(42523:43314)	Y(37663:38454)	N	N	N	N	N	N	N	N	N	N	N	N	N	N	N	N	N	N	N	N	Y(8848:9390)	Y(44045:44836)	N	N	N	N	N	N	N	N	N	N	N	N	N
hypothetical-protein-59	Y(98266:97172)	N	N	N	N	N	N	N	N	N	N	N	N	N	N	N	N	N	N	N	Y(96290:95196)	N	N	N	N	N	N	N	N	N	N	N	N	N	N	N	N	N	N	N	N	N	N	N	Y(97905:96811)	N	N	N	N
hypothetical-protein-60	N	N	N	N	N	N	N	N	N	N	N	N	N	N	N	N	N	N	N	N	N	N	N	N	N	N	N	N	Y	N	N	N	N	N	N	N	N	N	N	N	N	N	N	N	N	N	Y(34016:33687)	Y(34028:33699)	Y(34180:33851)
hypothetical-protein-61	N	N	Y(121332:121706)	N	N	N	N	N	N	N	N	N	N	N	N	N	N	N	N	N	N	N	Y(119992:120510)	N	N	N	N	N	N	N	N	N	N	N	N	N	N	N	N	N	N	N	N	N	N	N	N	N	N
hypothetical-protein-62	N	N	N	N	Y(47883:47284)	N	N	N	N	N	N	N	N	N	N	N	N	N	N	N	N	N	N	N	N	N	N	N	Y(47437:46838)	N	Y(59868:59269)	N	N	N	N	N	N	N	N	N	N	N	N	N	N	N	N	N	N
hypothetical-protein-63	Y(21840:22265)	N	N	N	N	Y(23498:23956)	Y(22914:23372)	Y(30634:31092)	Y(23142:23600)	Y(23531:23989)	Y(23547:24005)	Y(23263:23721)	N	N	N	N	N	N	N	N	Y(21539:21964)	N	N	N	N	N	N	N	N	N	Y(114530:114033)	N	N	N	N	Y(22006:22494)	N	N	N	N	N	N	N	N	Y(20532:20957)	N	N	N	N
hypothetical-protein-64	Y(24046:24741)	N	N	N	N	N	N	N	N	N	N	N	N	N	N	N	N	N	N	N	N	N	N	Y(32103:32900)	Y(32371:33168)	Y(32273:33070)	Y(32056:32853)	Y(31867:32664)	N	N	N	N	N	N	N	N	N	N	N	N	N	N	N	N	N	N	N	N	N
hypothetical-protein-65	N	N	N	N	N	N	N	N	N	N	N	N	N	N	N	N	N	N	N	N	N	N	N	N	N	N	N	N	N	N	N	N	N	N	Y(148447:147941)	N	N	N	N	N	N	N	N	N	N	N	N	N	N
hypothetical-protein-66	Y(80865:80437)	N	N	Y(64345:63917)	N	N	N	N	N	N	N	N	Y(64803:64375)	Y(59943:59515)	N	N	N	N	N	N	Y(78885:78457)	N	N	N	N	N	N	N	N	N	N	N	N	N	N	Y(66014:65586)	N	N	N	N	N	N	N	N	Y(80501:80073)	N	N	N	N
hypothetical-protein-67	N	N	N	N	N	N	N	N	N	N	N	N	N	N	Y(25788:26360)	N	N	N	N	N	N	N	N	N	N	N	N	N	N	N	N	N	N	N	N	N	Y(25510:26082)	N	N	Y(25596:26168)	Y(25452:26030)	Y(25524:26096)	Y(25778:26356)	Y(25596:26174)	N	Y(25491:26063)	N	N	N
hypothetical-protein-68	N	N	N	N	Y(98621:98358)	N	N	N	N	N	N	N	N	N	N	N	N	N	N	N	N	N	N	N	N	N	N	N	Y(98801:97794)	N	Y(113964:113059)	N	N	N	N	N	N	N	N	N	N	N	N	N	N	N	Y(112811:111831)	Y(110385:109396)	Y(113120:112140)
hypothetical-protein-69	N	N	N	N	N	N	N	N	N	N	N	N	N	N	Y(110619:109693)	N	N	N	N	N	N	N	N	N	N	N	N	N	N	N	N	N	N	N	N	N	Y(110559:109633)	N	N	Y(111549:110623)	Y(110534:109608)	Y(110577:109651)	Y(112093:111167)	Y(111904:110978)	N	Y(110113:109187)	N	N	N
hypothetical-protein-70	N	N	N	N	N	N	N	N	N	N	N	N	N	N	Y(102572:101994)	N	N	N	N	N	N	N	N	N	N	N	N	N	N	N	N	N	N	N	N	N	Y(102813:102235)	N	N	Y(103394:102816)	Y(102357:101779)	Y(102425:101847)	Y(103943:103365)	Y(103756:103178)	N	Y(102367:101789)	N	N	N
hypothetical-protein-72	N	N	N	N	N	N	N	N	N	N	N	N	N	N	Y(5724:6575)	N	N	N	N	N	N	N	N	N	N	N	N	N	N	N	N	N	N	N	N	N	Y(5756:6613)	N	N	Y(5730:6587)	Y(5697:6554)	Y(5703:6560)	Y(5691:6548)	Y(5691:6548)	N	Y(5717:6595)	N	N	N
hypothetical-protein-73	N	N	N	N	N	Y	Y	Y	Y	Y	Y	Y	N	N	Y(96950:97282)	N	N	N	N	N	N	N	N	N	N	N	N	N	N	N	N	N	N	N	N	N	Y(97197:97529)	N	N	Y(97778:98110)	Y(96741:97073)	Y(96809:97141)	Y(98327:98659)	Y(98140:98472)	N	Y(96751:97083)	N	N	N
hypothetical-protein-74	N	N	N	N	N	N	N	N	N	N	N	N	N	N	Y(130299:130886)	N	N	N	N	N	N	N	N	N	N	N	N	N	N	N	N	N	N	N	N	N	Y(130197:130784)	N	N	Y(131273:131860)	Y(130256:130843)	Y(130299:130886)	Y(131788:132375)	Y(131572:132159)	N	Y(129747:130334)	N	N	N
hypothetical-protein-75	N	N	N	N	N	N	N	N	N	N	N	N	N	N	N	Y	N	N	N	N	N	N	N	N	N	N	N	N	N	N	N	N	N	N	N	N	N	N	N	N	N	N	N	N	N	N	Y(52675:53367)	N	Y(52654:53346)
hypothetical-protein-76	N	N	N	N	N	N	N	N	N	N	N	N	N	N	Y(25262:25768)	N	N	N	N	N	N	N	N	N	N	N	N	N	N	N	N	N	N	N	N	N	Y(24985:25491)	N	N	Y(25070:25576)	Y(24926:25432)	Y(24998:25504)	Y(25252:25758)	Y(25070:25576)	N	Y(25005:25472)	N	N	N
hypothetical-protein-77	N	N	N	Y(17389:17811)	N	N	N	N	N	N	N	N	Y(17340:17759)	Y(17340:17759)	Y(118020:117592)	N	N	N	N	N	N	N	N	N	N	N	N	N	N	N	N	N	N	N	N	Y(17342:17761)	Y(117969:117535)	N	N	Y(118958:118524)	Y(117943:117509)	Y(117986:117552)	Y(119502:119068)	Y(119307:118873)	N	Y(117523:117089)	N	N	N
hypothetical-protein-78	N	N	N	N	N	N	N	N	N	N	N	N	N	N	N	N	N	N	N	N	N	N	N	N	N	N	N	N	N	N	N	N	N	N	N	N	N	N	N	N	N	N	N	N	N	N	N	N	N
hypothetical-protein-79	N	N	N	N	N	N	N	N	N	N	N	N	N	N	Y(15666:15833)	N	N	N	N	N	N	Y	N	N	N	N	N	N	Y	N	N	N	N	N	N	N	Y(15691:15858)	N	N	Y(15679:15846)	Y(15626:15793)	Y(15633:15800)	Y(15644:15811)	Y(15643:15810)	N	Y(15673:15840)	N	N	N
hypothetical-protein-80	N	N	N	N	N	N	N	N	N	N	N	N	N	N	Y(35551:35703)	N	N	N	N	N	N	N	N	N	N	N	N	N	N	N	N	N	N	N	N	N	Y(35277:35429)	N	N	Y(35371:35523)	Y(35229:35381)	Y(35296:35448)	Y(35559:35711)	Y(35377:35529)	N	Y(35258:35410)	N	N	N
hypothetical-protein-81	N	N	N	N	N	N	N	N	N	N	N	N	N	N	N	N	N	N	N	N	N	N	N	N	N	N	N	N	N	N	N	N	N	N	N	N	N	N	N	N	N	N	N	N	N	N	N	N	N
hypothetical-protein-83	N	N	N	N	N	N	N	N	N	N	N	N	N	N	N	N	N	N	N	N	N	N	N	N	N	N	N	N	N	N	N	N	N	N	N	N	N	N	N	N	N	N	N	N	N	N	N	N	N
hypothetical-protein-84	N	N	N	N	N	N	N	N	N	N	N	N	N	N	N	N	N	N	N	N	Y(9109:9279)	N	N	N	N	N	N	N	N	N	N	N	N	N	N	N	N	N	N	N	N	N	N	N	Y(9132:9302)	N	N	N	N
hypothetical-protein-85	N	N	N	N	N	N	N	N	N	N	N	N	N	N	Y(5377:5556)	N	N	N	N	N	Y(16593:17192)	N	N	N	N	N	N	N	N	N	N	N	N	N	N	N	Y(5406:5585)	N	N	N	N	N	N	N	N	Y(5388:5567)	N	N	N
hypothetical-protein-86	N	N	N	N	N	N	N	N	N	N	N	N	N	N	N	N	N	N	N	N	N	N	N	Y	Y	Y	Y	Y	N	N	N	N	N	N	N	N	N	N	N	N	N	N	N	N	N	N	N	N	N
hypothetical-protein-87	N	N	N	N	N	N	N	N	N	N	N	N	N	N	Y(44238:44423)	N	N	N	N	N	N	N	N	N	N	N	N	N	N	N	N	N	N	N	Y	N	Y(44377:44562)	N	N	Y(44043:44228)	Y(43885:44070)	Y(43952:44137)	Y(44219:44404)	Y(44044:44229)	N	Y(43889:44116)	N	N	N
hypothetical-protein-88	N	N	N	N	N	N	N	N	N	N	N	N	N	N	Y(6942:6787)	N	N	N	N	N	N	N	N	N	N	N	N	N	N	N	N	N	N	N	N	N	Y(6980:6825)	N	N	Y(6957:6787)	Y(6906:6736)	Y(6912:6742)	Y(6922:6761)	Y(6922:6761)	N	Y(6962:6807)	N	N	N
hypothetical-protein-89	N	N	N	N	N	N	N	N	N	N	N	N	N	N	Y(98298:98143)	N	N	N	N	N	N	N	N	N	N	N	N	N	N	N	N	N	N	N	N	N	Y(98546:98391)	N	N	Y(99127:98972)	Y(98090:97935)	Y(98158:98003)	Y(99676:99521)	Y(99489:99334)	N	Y(98238:97945)	N	N	N
hypothetical-protein-9	Y(36282:36923)	N	Y(118573:117953)	Y(26428:27078)	Y(45373:45960)	Y(29301:29951)	Y(28717:29376)	Y(36433:37092)	Y(28945:29604)	Y(29333:29992)	Y(29348:29995)	Y(29066:29401)	Y(26351:26998)	N	Y(120441:121241)	Y(8693:9325)	Y(8725:9357)	Y(8693:9325)	Y(8734:9369)	Y(8722:9354)	Y(35124:35768)	Y	Y(117218:116598)	N	N	N	N	N	Y(45424:46011)	Y(7464:6709)	N	Y(8736:9371)	Y(8725:9360)	Y(8725:9360)	Y(123886:124566)	Y(27864:28508)	Y(120390:121190)	Y(8715:9347)	Y(120909:120196)	Y(121379:122179)	Y(120363:121163)	Y(120406:121206)	Y(121921:122721)	Y(121726:122526)	Y(34393:35040)	Y(119944:120744)	N	N	N
hypothetical-protein-90	N	N	N	N	Y	N	N	N	N	N	N	N	N	N	N	N	N	N	N	N	N	N	N	Y(131057:131470)	Y(131444:131857)	Y(130448:130861)	Y(130409:130822)	Y(130994:131407)	Y	N	N	N	N	N	N	N	N	N	N	N	N	N	N	N	N	N	N	N	N
hypothetical-protein-91	N	N	N	N	N	Y	Y	Y	Y	Y	Y	Y	N	N	N	N	N	N	N	N	N	N	N	N	N	N	N	N	N	N	N	N	N	N	N	N	N	N	N	N	N	N	N	N	N	N	N	N	N
hypothetical-protein-92	N	N	N	N	N	N	N	N	N	N	N	N	N	N	N	N	N	N	N	N	N	N	N	N	N	N	N	N	N	N	N	N	N	N	N	N	N	N	N	N	N	N	N	N	N	N	N	N	N
hypothetical-protein-93	N	N	N	N	N	N	N	N	N	N	N	N	N	N	Y(81737:81408)	N	N	N	N	N	N	N	N	N	N	N	N	N	N	N	N	N	N	N	N	N	Y(82413:82084)	N	N	Y(82849:82499)	Y(82254:81925)	Y(82322:81993)	Y(83402:83073)	Y(83212:82883)	N	Y(81967:81638)	N	N	N
hypothetical-protein-94	N	N	N	N	N	N	N	N	N	N	N	N	N	N	N	N	N	N	N	N	N	N	N	Y(116809:116504)	Y(117171:116866)	Y(116199:115894)	Y(116155:115850)	Y(116722:116417)	N	N	N	N	N	N	N	N	N	N	N	N	N	N	N	N	N	N	N	N	N
hypothetical-protein-95	N	N	N	N	N	N	N	N	N	N	N	N	N	N	N	N	N	N	N	N	N	N	N	Y(129765:129214)	Y(130151:129600)	Y(129156:128605)	Y(129116:128565)	Y(129701:129150)	N	N	N	N	N	N	N	N	N	N	N	N	N	N	N	N	N	N	N	N	N
hypothetical-protein-96	N	N	N	N	Y(8540:8788)	N	N	N	N	N	N	N	N	N	N	N	N	N	N	N	N	N	N	N	N	N	N	N	Y(8570:8785)	N	Y(28724:28485)	N	N	N	N	N	N	N	N	N	N	N	N	N	N	N	Y(9043:9276)	Y(8988:9227)	Y(9015:9248)
hypothetical-protein-97	N	N	N	N	Y(13362:12961)	N	N	N	N	N	N	N	N	N	N	N	N	N	N	N	N	N	N	Y(89652:89894)	Y(90048:90290)	Y(89822:90064)	Y(89788:90030)	Y(89599:89841)	Y(13359:12958)	N	N	N	N	N	N	N	N	N	N	N	N	N	N	N	N	N	N	N	N
hypothetical-protein-98	N	N	N	N	N	N	N	N	N	N	N	N	N	N	N	N	N	N	N	N	N	N	N	Y(116377:115715)	Y(116739:116077)	Y(115767:115105)	Y(115723:115061)	Y(116290:115628)	N	N	N	N	N	N	N	N	N	N	N	N	N	N	N	N	N	N	N	N	N
hypothetical-protein-99	N	N	N	N	N	N	N	N	N	N	N	N	N	N	N	N	N	N	N	N	N	N	N	Y(103697:102693)	Y(104074:103070)	Y(103866:102862)	Y(103800:102802)	Y(103625:102621)	N	N	N	N	N	N	N	N	N	N	N	N	N	N	N	N	N	N	N	N	N
IAP-1	N	Y(18333:18941)	N	Y(103057:103917)	Y(87348:87866)	N	N	N	N	N	N	N	Y(103606:104466)	Y(98746:99606)	N	N	N	N	N	N	N	N	N	N	N	N	N	N	Y(86913:87431)	N	Y(101851:102384)	N	N	N	N	Y(104713:105573)	N	N	Y(99009:99479)	N	N	N	N	N	N	N	Y(97555:98061)	Y(95072:95578)	Y(97845:98351)
IAP-2	Y(124213:125043)	Y(65354:65851)	Y(102523:103365)	N	Y	Y(105875:106825)	Y(105191:106141)	Y(112927:113877)	Y(105508:106452)	Y(105770:106720)	Y(105937:106887)	Y(105616:106566)	N	N	Y(98146:97340)	Y(17597:18454)	Y(17625:18503)	Y(17597:18463)	Y(17646:18515)	Y(17630:18508)	Y(122970:123827)	Y	Y(101383:102225)	Y(39029:38193)	Y(39298:38462)	Y(39198:38362)	Y(38979:38143)	Y(38791:37955)	Y(68900:68247)	Y(67674:66655)	Y(52036:52845)	Y(17619:18488)	Y(17603:18478)	Y(17607:18476)	Y(136811:137281)	N	Y(98394:97588)	Y(17596:18471)	Y(38844:38038)	Y(98975:98169)	Y(97938:97132)	Y(98006:97200)	Y(99524:98718)	Y(99337:98531)	Y(124554:125411)	Y(97948:97142)	Y(12969:13796)	Y(12848:13675)	Y(12865:13692)
iap-2	N	N	N	Y(82990:82127)	N	Y(85797:84838)	Y(85105:84146)	Y(92847:91888)	Y(85407:84448)	Y(85675:84716)	Y(85841:84882)	Y(85540:84581)	Y(83529:82666)	Y(78669:77806)	Y(53924:53172)	N	N	N	Y(55188:55937)	Y(54670:55419)	N	Y(71622:70837)	Y(73564:72836)	Y(58577:59506)	Y(58871:59800)	Y(58746:59675)	Y(58549:59478)	Y(58382:59311)	N	N	N	Y(55654:56403)	Y(55238:55987)	Y(54513:55262)	N	Y(84669:83806)	Y(54584:53832)	Y(54946:55695)	N	Y(55007:54255)	N	N	N	Y(55390:54638)	N	Y(54138:53386)	N	N	N
iap-3	N	Y(66215:66565)	N	N	N	N	N	N	N	N	N	N	N	N	N	N	N	N	N	N	N	N	N	N	N	N	N	N	N	N	N	N	N	N	N	N	N	N	N	N	N	N	N	N	N	N	N	N	N
ie-0	Y(151114:150410)	N	Y(14690:13968)	Y(129723:129013)	N	Y(132701:131967)	Y(132021:131287)	Y(139757:139023)	Y(132352:131618)	Y(132604:131870)	Y(132778:132044)	Y(132455:131721)	Y(130147:129437)	Y(125227:124517)	Y(6930:7787)	Y(113909:114694)	Y(111173:111958)	Y(111767:112552)	Y(111989:112774)	Y(111823:112608)	Y(151890:151186)	Y(6702:5854)	Y(14911:14189)	Y(12038:12985)	Y(12320:13264)	Y(12206:13153)	Y(11995:12942)	Y(11816:12760)	N	Y(29776:29018)	N	Y(112087:112872)	Y(111722:112507)	Y(110750:111535)	Y(21542:20766)	Y(131393:130683)	Y(6968:7825)	Y(111894:112679)	Y(18698:19495)	Y(6945:7802)	Y(6894:7751)	Y(6900:7757)	Y(6910:7767)	Y(6910:7767)	Y(151330:150626)	Y(6950:7807)	N	N	N
IE-1	Y(146922:145099)	N	Y(10143:8371)	Y(125499:123448)	N	Y(128370:126244)	Y(127690:125573)	Y(135426:133309)	Y(128022:125899)	Y(128274:126154)	Y(128447:126321)	Y(128124:126001)	Y(125923:123878)	Y(121003:118958)	Y(11339:13306)	Y(118307:120061)	Y(115571:117325)	Y(116165:117919)	Y(116390:118144)	Y(116221:117975)	Y(147690:145879)	Y(1970:111)	Y(10349:8892)	Y(16598:18826)	Y(16873:19101)	Y(16766:18994)	Y(16554:18782)	Y(16369:18597)	N	Y(25403:23232)	N	Y(116489:118243)	Y(116123:117877)	Y(115151:116905)	Y(17152:15461)	Y(127169:125124)	Y(11375:13342)	Y(116295:118049)	Y(23325:25439)	Y(11353:13320)	Y(11301:13268)	Y(11308:13275)	Y(11318:13285)	Y(11317:13284)	Y(147130:145325)	Y(11318:13324)	N	N	N
ie-1	N	N	N	N	Y(4349:2967)	N	N	N	N	N	N	N	N	N	N	N	N	N	N	N	N	N	N	N	N	N	N	N	Y(4347:2965)	N	Y(8465:7074)	N	N	N	N	N	N	N	N	N	N	N	N	N	N	N	Y(4886:3420)	Y(4833:3340)	Y(4857:3391)
ie-2	N	N	Y(6696:5809)	N	N	N	N	N	N	N	N	N	N	N	N	Y(123246:122020)	Y(120507:119239)	Y(121065:119797)	Y(121245:119980)	Y(121157:119889)	N	Y(139269:140046)	Y(6844:5774)	N	N	N	N	N	N	N	N	N	N	N	N	N	N	Y(121243:119963)	N	N	N	N	N	N	N	N	Y(19785:18661)	Y(19775:18651)	Y(19719:18571)
immediate-early-protein-2	N	N	N	N	N	N	N	N	N	N	N	N	N	N	N	N	N	N	N	N	N	N	N	N	N	N	N	N	N	N	N	N	N	N	N	N	N	N	N	N	N	N	N	N	N	N	N	N	N
j-domain-binding-protein	Y(126258:125092)	N	Y(90647:89688)	Y(105158:103965)	N	Y(108132:106885)	Y(107454:106201)	Y(115190:113937)	Y(107765:106512)	Y(108032:106779)	Y(108197:106947)	Y(107876:106626)	Y(105707:104514)	Y(100847:99654)	Y(34832:35410)	Y(38367:39326)	Y(37516:38475)	Y(38369:39328)	Y(38065:39024)	Y(37530:38489)	Y(125020:123866)	Y(90363:89092)	Y(89814:89215)	Y(37084:38124)	Y(37353:38393)	Y(37253:38293)	Y(37034:38074)	Y(36846:37886)	N	Y(49386:50285)	N	Y(38537:39496)	Y(38120:39079)	Y(37389:38348)	Y(50652:51527)	Y(106814:105621)	Y(34558:35136)	Y(37825:38784)	Y(36078:37316)	Y(34652:35230)	Y(34510:35088)	Y(34577:35155)	Y(34840:35418)	Y(34658:35236)	Y(126604:125450)	Y(34437:35117)	N	N	N
Ld-13	N	N	N	N	N	N	N	N	N	N	N	N	N	N	N	N	N	N	N	N	N	N	N	N	N	N	N	N	N	N	N	N	N	N	N	N	N	N	N	N	N	N	N	N	N	N	N	N	N
Ld-chitinase	N	N	N	N	N	N	N	N	N	N	N	N	N	N	N	N	N	N	N	N	N	N	N	N	N	N	N	N	N	N	N	N	N	N	Y	N	N	N	N	N	N	N	N	N	N	N	N	N	N
Ld129	N	N	N	Y(29725:27098)	N	Y(32638:29987)	Y(32063:29412)	Y(39779:37128)	Y(32291:29640)	Y(32679:30028)	Y(32682:30031)	Y(32412:29761)	Y(29654:27018)	Y(24794:22164)	Y(124165:121322)	N	N	N	N	N	Y(38355:35800)	N	N	Y(140449:137651)	Y(140839:138041)	Y(139839:137041)	Y(139800:137002)	Y(140388:137590)	N	Y(3925:6642)	N	N	N	N	Y(127360:124694)	Y(31164:28528)	Y(124116:121273)	N	Y(117225:120083)	Y(125103:122260)	Y(124087:121244)	Y(124130:121287)	Y(125645:122802)	Y(125450:122607)	Y(37631:35076)	Y(123670:120827)	N	N	N
Ld141	Y(58676:60127)	N	Y(38454:39704)	Y(46662:48215)	N	Y(48983:50569)	Y(48410:49996)	Y(56128:57714)	Y(48629:50215)	Y(49025:50611)	Y(49027:50613)	Y(48755:50341)	Y(46596:48149)	Y(41736:43289)	Y(94563:96095)	Y(90705:89431)	Y(90082:88808)	Y(90713:89439)	Y(90688:89414)	Y(90735:89461)	Y(56345:57799)	Y(30286:31593)	Y(37263:38513)	Y(107976:106381)	Y(108354:106759)	Y(108146:106551)	Y(108097:106502)	Y(107905:106310)	N	Y(125133:126983)	N	Y(90939:89665)	Y(90573:89299)	Y(89600:88326)	Y(139681:138053)	Y(48118:49671)	Y(94816:96342)	Y(90835:89561)	Y(101974:100286)	Y(95397:96923)	Y(94360:95886)	Y(94428:95954)	Y(95946:97472)	Y(95759:97285)	Y(55639:57093)	Y(94370:95896)	N	N	N
LdOrf-5	N	N	N	N	N	N	N	N	N	N	N	N	N	N	N	N	N	N	N	N	N	N	N	N	N	N	N	N	N	N	N	N	N	N	Y(7982:8551)	N	N	N	N	N	N	N	N	N	N	N	N	N	N
LdOrf-69	N	N	N	N	N	N	N	N	N	N	N	N	N	N	N	N	N	N	N	N	N	N	N	N	N	N	N	N	N	N	N	N	N	N	Y(64098:63946)	N	N	N	N	N	N	N	N	N	N	N	N	N	N
lef-1	Y(30883:31530)	Y(63295:62660)	Y(119768:120499)	Y(17398:16679)	Y(52501:51881)	Y(18479:17829)	Y(17896:17246)	Y(17914:17264)	Y(18124:17474)	Y(18492:17842)	Y(18507:17857)	Y(18244:17594)	Y(17349:16630)	Y(17349:16630)	Y(117617:116880)	Y(6260:5448)	Y(6292:5480)	Y(6260:5448)	Y(6302:5490)	Y(6289:5477)	Y(29733:30380)	Y(123642:124379)	Y(118323:119054)	Y(134008:133364)	Y(134398:133754)	Y(133399:132755)	Y(133358:132714)	Y(133947:133303)	Y(52136:51435)	Y(10734:11438)	Y(64951:64190)	Y(6301:5486)	Y(6292:5480)	Y(6292:5480)	Y(120499:119795)	Y(17348:16629)	Y(117560:116823)	Y(6280:5468)	Y(124016:124717)	Y(118549:117812)	Y(117534:116797)	Y(117577:116840)	Y(119093:118356)	Y(118898:118161)	Y(29002:29649)	Y(117114:116377)	Y(59502:58795)	Y(56803:56096)	Y(59622:58915)
lef-10	Y(121151:120924)	N	Y(89015:88770)	Y(100037:99810)	Y(103717:103947)	Y(102582:102349)	Y(101895:101662)	Y(109634:109401)	Y(102217:101984)	Y(102476:102243)	Y(102653:102420)	Y(102326:102093)	Y(100586:100359)	Y(95726:95499)	Y(39932:40147)	Y(40319:40555)	Y(39468:39704)	Y(40321:40557)	Y(40017:40253)	Y(39482:39718)	Y(119225:118998)	N	Y	Y(41844:42074)	Y(42113:42343)	Y(42013:42243)	Y(41794:42024)	Y(41607:41837)	N	Y	Y(122046:122276)	Y(40489:40725)	Y(40072:40308)	Y(39341:39577)	Y(53842:54096)	Y(101694:101467)	Y(40081:40296)	Y(39777:40013)	Y	Y(39745:39960)	Y(39602:39817)	Y(39669:39884)	Y(39933:40148)	Y(39752:39967)	Y(120798:120571)	Y(39605:39850)	Y(118010:118279)	Y(115605:115874)	Y(118320:118589)
lef-11	Y(136681:137043)	Y(4557:4249)	Y(111300:110974)	Y(113445:113846)	Y(42253:41957)	Y(116589:117020)	Y(115911:116342)	Y(123647:124078)	Y(116225:116656)	Y(116486:116917)	Y(116657:117088)	Y(116333:116764)	Y(114003:114404)	Y(109143:109544)	Y(27703:27320)	Y(26637:26299)	Y(25810:25472)	Y(26639:26301)	Y(26358:26020)	Y(25820:25482)	Y(137460:137834)	Y(101984:102331)	Y	Y(28779:28318)	Y(29050:28589)	Y(28949:28488)	Y(28732:28271)	Y(28546:28085)	Y(42304:42008)	Y	Y(51732:51412)	Y(26853:26515)	Y(26414:26076)	Y(25692:25354)	Y(41760:41197)	Y(115101:115502)	Y(27430:27047)	Y(26120:25782)	Y(28786:28430)	Y(27512:27129)	Y(27371:26988)	Y(27437:27054)	Y(27700:27317)	Y(27518:27135)	Y(136904:137278)	Y(27480:27028)	Y(47728:47306)	Y(47694:47293)	Y(47871:47467)
lef-12	Y(110088:110735)	N	Y(99471:98956)	N	N	N	N	N	N	N	N	N	N	N	Y(31078:31749)	Y(29621:30154)	Y(28794:29327)	Y(29623:30156)	Y(29342:29875)	Y(28804:29337)	N	Y(96469:95894)	Y(98331:97816)	N	N	N	N	N	N	N	N	Y(29837:30370)	Y(29398:29931)	Y(28667:29200)	N	N	Y(30804:31475)	Y(29104:29637)	Y(33114:32272)	Y(30895:31566)	Y(30754:31425)	Y(30820:31491)	Y(31083:31754)	Y(30901:31572)	N	Y(30785:31456)	N	N	N
lef-13	N	N	N	Y(19987:18932)	N	Y(20979:20110)	Y(20396:19527)	Y(28115:27246)	Y(20624:19755)	Y(20992:20123)	Y(21007:20138)	Y(20744:19875)	Y(19934:18879)	Y(19934:18879)	N	N	N	N	N	N	N	N	N	N	N	N	N	N	N	N	N	N	N	N	N	Y(19849:18887)	N	N	N	N	N	N	N	N	N	N	N	N	N
lef-2	Y(13849:14484)	Y(52096:52683)	Y(124995:125735)	Y(14838:15482)	Y(26676:27194)	Y(16043:16672)	Y(15460:16089)	Y(15478:16107)	Y(15688:16317)	Y(16062:16691)	Y(16077:16706)	Y(15814:16443)	Y(14790:15431)	Y(14790:15431)	Y(111867:111151)	Y(128885:129517)	Y(125364:125996)	Y(126704:127336)	Y(126117:126749)	Y(126082:126714)	Y(14018:14665)	Y(131670:132356)	Y(124110:124850)	Y(131394:132074)	Y(131781:132461)	Y(130785:131465)	Y(130746:131426)	Y(131331:132011)	Y(26711:27229)	Y(116059:116694)	Y(33931:34476)	Y(127140:127772)	Y(125645:126277)	Y(124676:125308)	Y(134904:135563)	Y(14797:15435)	Y(111807:111091)	Y(126102:126734)	Y(110826:111515)	Y(112799:112083)	Y(111784:111068)	Y(111827:111111)	Y(113343:112627)	Y(113154:112438)	Y(14040:14687)	Y(111361:110645)	Y(34157:34672)	Y(34169:34684)	Y(34321:34836)
LEF-3	Y(24878:25198)	N	Y(75481:76590)	Y(84059:85222)	N	Y(86881:88155)	Y(86189:87463)	Y(93931:95202)	Y(86491:87762)	Y(86759:88024)	Y(86925:88196)	Y(86621:87874)	Y(84598:85764)	Y(79738:80904)	Y(55186:56325)	Y(54135:52978)	Y(53307:52150)	Y(54137:52980)	Y(53832:52675)	Y(53332:52175)	Y(23812:24126)	Y(72852:>73746)	Y(74702:75757)	Y(58159:56798)	Y(58453:57095)	Y(58328:56967)	Y(58131:56773)	Y(57964:56600)	N	Y(68139:69449)	N	Y(54319:53162)	Y(53903:52746)	Y(53175:52018)	Y(74922:76043)	Y(85738:86904)	Y(55846:56985)	Y(53608:52451)	Y(60087:61340)	Y(56269:57408)	Y(55692:56831)	Y(55759:56898)	Y(56830:57969)	Y(56652:57791)	Y(22800:23114)	Y(55391:56539)	N	N	N
lef-3	Y(101053:102210)	N	N	N	Y(86961:85942)	N	N	N	N	N	N	N	N	N	N	N	N	N	N	N	Y(99061:100242)	N	N	N	N	N	N	N	Y(86526:85507)	N	Y(101423:100395)	N	N	N	N	N	N	N	N	N	N	N	N	N	Y(100655:101836)	N	Y(97065:96004)	Y(94599:93538)	Y(97374:96313)
lef-4	Y(89014:87650)	Y(59617:58211)	Y(62985:61609)	Y(71960:70581)	Y(70777:69341)	Y(73267:71867)	Y(72575:71175)	Y(80317:78917)	Y(72883:71483)	Y(73158:71758)	Y(73303:71903)	Y(73036:71636)	Y(72418:71039)	Y(67558:66179)	Y(71330:72715)	Y(68524:69921)	Y(67851:69248)	Y(68529:69926)	Y(68381:69778)	Y(67870:69267)	Y(87034:85670)	Y(58894:57479)	Y(62182:60806)	Y(81046:82434)	Y(81448:82836)	Y(81217:82605)	Y(81188:82576)	Y(81001:82389)	Y(70341:68905)	Y(84753:86168)	Y(82946:81540)	Y(68866:70263)	Y(68412:69809)	Y(67531:68928)	Y(90291:91748)	Y(73629:72250)	Y(72006:73391)	Y(67823:69220)	Y(76834:78264)	Y(72414:73799)	Y(71842:73227)	Y(71909:73294)	Y(72986:74371)	Y(72802:74187)	Y(88649:87285)	Y(71518:72945)	Y(78200:76758)	Y(75686:74244)	Y(78502:77060)
lef-5	Y(75882:75061)	Y(53417:52710)	Y(52909:52130)	Y(61588:60758)	Y(61797:61060)	Y(64098:63259)	Y(63406:62567)	Y(71124:70285)	Y(63736:62897)	Y(64008:63169)	Y(64150:63311)	Y(63863:63024)	Y(62046:61216)	Y(57186:56356)	Y(80467:81414)	Y(78749:79546)	Y(78042:78839)	Y(78754:79551)	Y(78583:79380)	Y(78887:79684)	Y(73900:73079)	Y(50143:49322)	Y(52145:51366)	Y(90766:91641)	Y(91162:92037)	Y(90936:91811)	Y(90902:91777)	Y(90713:91588)	Y(61375:60638)	Y(94913:95779)	Y(74116:73361)	Y(79060:79857)	Y(78623:79420)	Y(77720:78517)	Y(99000:99836)	Y(63257:62427)	Y(81143:82090)	Y(78804:79601)	Y(85811:86662)	Y(81558:82505)	Y(80984:81931)	Y(81052:81999)	Y(82132:83079)	Y(81942:82889)	Y(75528:74707)	Y(80697:81644)	Y(69120:68392)	Y(66427:65699)	Y(69246:68518)
lef-6	Y(140731:141162)	N	Y(103365:103748)	Y(118100:118561)	Y(56351:56037)	Y(121851:122342)	Y(121179:121670)	Y(128915:129406)	Y(121491:121982)	Y(121745:122239)	Y(121917:122408)	Y(121599:122096)	Y(118463:118930)	Y(113603:114070)	Y(20412:19849)	Y(18459:18980)	Y(18508:19029)	Y(18468:18989)	Y(18520:19041)	Y(18513:19034)	Y(141533:141958)	Y(106711:106103)	Y(102075:102608)	Y(23144:22665)	Y(23414:22941)	Y(23312:22833)	Y(23095:22622)	Y(22910:22437)	Y(55929:55615)	Y(34329:35054)	Y(68469:68221)	Y(18494:19018)	Y(18483:19001)	Y(18481:18999)	Y(37367:37846)	Y(119764:120234)	Y(20436:19873)	Y(18476:18997)	Y(12508:11762)	Y(20419:19856)	Y(20374:19811)	Y(20381:19818)	Y(20384:19821)	Y(20385:19822)	Y(140979:141404)	Y(20418:19855)	Y(63488:63183)	Y(60795:60490)	Y(63614:63309)
lef-7	Y(16718:16200)	N	N	N	N	N	N	N	N	N	N	N	N	N	N	N	N	N	N	N	N	N	N	N	N	N	N	N	N	N	N	N	N	N	N	N	N	N	N	N	N	N	N	N	N	N	N	N	N
lef-8	Y(126279:128915)	Y(72378:74909)	Y(90671:93292)	Y(105179:107824)	Y(101317:98675)	Y(108153:110858)	Y(107475:110180)	Y(115211:117916)	Y(107786:110494)	Y(108053:110758)	Y(108218:110926)	Y(107897:110605)	Y(105728:108373)	Y(100868:103513)	Y(34779:32074)	Y(38340:35707)	Y(37489:34856)	Y(38342:35709)	Y(38008:35405)	Y(37503:34870)	Y(125041:127677)	Y(90463:93180)	Y(89838:92459)	Y(37060:34217)	Y(37329:34489)	Y(37229:34386)	Y(37010:34170)	Y(36822:33982)	Y(101497:98855)	Y(49077:46690)	Y(117290:114639)	Y(38510:35877)	Y(38093:35463)	Y(37362:34732)	Y(50653:48038)	Y(106835:109480)	Y(34505:31800)	Y(37798:35168)	Y(36038:33321)	Y(34596:31891)	Y(34227:31750)	Y(34521:31816)	Y(34784:32079)	Y(34602:31897)	Y(126625:129261)	Y(34486:31781)	Y(115510:112889)	Y(113090:110466)	Y(115819:113198)
lef-9	Y(114206:112689)	Y(38953:37364)	Y(84613:83126)	Y(93740:92244)	Y(88694:90175)	Y(96217:94730)	Y(95524:94037)	Y(103263:101776)	Y(95829:94342)	Y(96088:94601)	Y(96259:94772)	Y(95938:94451)	Y(94280:92784)	Y(89420:87924)	Y(44545:46104)	Y(44506:45978)	Y(43664:45136)	Y(44508:45980)	Y(44193:45665)	Y(43678:45150)	Y(112242:110749)	Y(83724:82252)	Y(83818:82331)	Y(46156:47646)	Y(46425:47915)	Y(46325:47815)	Y(46106:47596)	Y(45919:47409)	Y(88259:89740)	Y(57767:59281)	Y(103238:104728)	Y(44667:46139)	Y(44251:45723)	Y(43526:44998)	Y(58005:59495)	Y(95421:93925)	Y(44688:46247)	Y(43954:45426)	Y(46687:48216)	Y(44345:45904)	Y(44188:45747)	Y(44255:45814)	Y(44522:46081)	Y(44347:45906)	Y(113829:112336)	Y(44242:45801)	Y(99045:100544)	Y(96562:98061)	Y(99335:100834)
Maco-A	Y(138127:137930)	N	N	Y(115373:115170)	N	Y(118570:118364)	Y(117898:117692)	Y(125634:125428)	Y(118206:118000)	Y(118464:118258)	Y(118635:118429)	Y(118314:118108)	Y(115929:115726)	Y(111069:110866)	N	N	N	N	N	N	Y(138921:138724)	N	N	Y(27029:27259)	Y(27298:27528)	Y(27198:27428)	Y(26978:27208)	Y(26793:27023)	N	N	N	N	N	N	N	Y(117033:116830)	N	N	N	N	N	N	N	N	Y(138367:138170)	N	N	N	N
maco-A	Y(39893:40591)	N	N	N	N	N	N	N	N	N	N	N	N	N	N	N	N	N	N	N	Y(38884:39411)	N	N	N	N	N	N	N	N	N	N	N	N	N	N	N	N	N	N	N	N	N	N	N	Y(38160:38687)	N	N	N	N
me53	Y(8746:7682)	N	Y(14961:16364)	Y(8074:9165)	Y(107525:108436)	Y(9250:10419)	Y(9278:10447)	Y(9296:10465)	Y(9270:10439)	Y(9276:10445)	Y(9273:10442)	Y(9283:10452)	Y(8078:9169)	Y(8078:9169)	Y(14584:15663)	Y(113632:112274)	Y(110896:109541)	Y(111490:110129)	Y(111712:110357)	Y(111546:110191)	Y(8929:7865)	Y	Y(15161:16594)	Y(11755:10649)	Y(12037:10931)	Y(11923:10817)	Y(11712:10606)	Y(11533:10427)	Y(107707:108618)	Y(30001:31353)	Y(126968:127897)	Y(111810:110452)	Y(111445:110090)	Y(110473:109115)	Y(23921:24946)	Y(8066:9157)	Y(14609:15688)	Y(111617:110256)	Y(18349:17219)	Y(14597:15676)	Y(14544:15623)	Y(14551:15630)	Y(14562:15641)	Y(14561:15640)	Y(8952:7888)	Y(14591:15670)	Y(122194:123105)	Y(119816:120736)	Y(122530:123441)
metalloproteinase	N	N	N	N	Y(29723:28389)	N	N	N	N	N	N	N	N	N	N	N	N	N	N	N	N	N	N	N	N	N	N	N	Y(29722:28424)	N	Y(42183:40738)	N	N	N	N	N	N	N	N	N	N	N	N	N	N	N	Y(38312:36672)	Y(38328:36691)	Y(38473:36836)
nrk1	Y(61912:60833)	N	N	Y(50036:48930)	N	Y(52459:51365)	Y(51886:50792)	Y(59604:58510)	Y(52105:51011)	Y(52501:51407)	Y(52503:51409)	Y(52231:51137)	Y(49968:48862)	Y(45108:44002)	N	N	N	N	N	N	Y(59607:58498)	N	N	Y(104458:105501)	Y(104836:105879)	Y(104628:105671)	Y(104562:105605)	Y(104387:105430)	N	N	Y(12475:11840)	N	N	N	Y(135679:136554)	Y(51490:50384)	N	N	N	N	N	N	N	N	Y(58901:57792)	N	N	N	N
nudix	Y(136052:136744)	N	Y(111901:111284)	Y(112816:113550)	Y(49835:50500)	Y(115933:116715)	Y(115255:116037)	Y(122991:123773)	Y(115569:116351)	Y(115830:116612)	Y(116001:116783)	Y(115677:116459)	Y(113374:114108)	Y(108514:109248)	Y(28388:27672)	Y(27253:26600)	Y(26426:25773)	Y(27255:26602)	Y(26974:26321)	Y(26436:25783)	Y(136831:137535)	Y(101377:102009)	Y(110524:109907)	Y(29462:28611)	Y(29733:28882)	Y(29632:28781)	Y(29415:28564)	Y(29229:28378)	Y(49389:50054)	Y(40150:39530)	Y(62451:63113)	Y(27469:26816)	Y(27030:26377)	Y(26308:25655)	Y(42431:41679)	Y(114472:115206)	Y(28115:27399)	Y(26736:26083)	Y(29433:28711)	Y(28197:27481)	Y(28056:27340)	Y(28122:27406)	Y(28385:27669)	Y(28203:27487)	Y(136275:136979)	Y(28096:27380)	Y(55806:56468)	Y(53063:53614)	Y(55790:56452)
odv-e18	Y(149005:148754)	Y(61286:61489)	Y(12513:12250)	Y(127610:127365)	Y(9877:9599)	Y(130534:130292)	Y(129854:129612)	Y(137590:137348)	Y(130186:129944)	Y(130438:130196)	Y(130611:130369)	Y(130288:130046)	Y(128034:127789)	Y(123114:122869)	Y(9221:9466)	Y(116147:116452)	Y(113411:113716)	Y(114005:114310)	Y(114227:114535)	Y(114061:114366)	Y(149781:149524)	Y(4253:3978)	Y(12733:12470)	Y(14440:14685)	Y(14719:14964)	Y(14608:14853)	Y(14397:14642)	Y(14215:14460)	Y(9874:9596)	Y(27526:27278)	Y(9717:9439)	Y(114328:114633)	Y(113963:114268)	Y(112991:113296)	Y(19346:19080)	Y(129280:129035)	Y(9328:9504)	Y(114132:114440)	Y(21058:21324)	Y(9236:9481)	Y(9185:9430)	Y(9191:9436)	Y(9201:9446)	Y(9201:9446)	Y(149221:148964)	Y(9241:9486)	Y(10486:10232)	Y(10361:10107)	Y(10399:10145)
odv-e25	Y(85759:85109)	Y(5873:6523)	Y(59753:59067)	Y(69301:68651)	Y(67293:66649)	Y(70377:69727)	Y(69684:69034)	Y(77404:76754)	Y(70011:69361)	Y(70285:69635)	Y(70430:69780)	Y(70143:69493)	Y(69759:69109)	Y(64899:64249)	Y(74068:74760)	Y(71699:72385)	Y(71017:71703)	Y(71704:72390)	Y(71544:72230)	Y(71058:71744)	Y(83774:83124)	Y(56072:55401)	Y(58989:58303)	Y(83768:84445)	Y(84170:84847)	Y(83939:84616)	Y(83910:84587)	Y(83723:84397)	Y(66859:66215)	Y(87912:88592)	Y(79605:78952)	Y(72032:72718)	Y(71577:72263)	Y(70697:71383)	Y(93101:93754)	Y(70970:70320)	Y(74744:75436)	Y(70990:71676)	Y(80057:80728)	Y(75152:75850)	Y(74580:75278)	Y(74647:75345)	Y(75724:76422)	Y(75540:76235)	Y(85389:84739)	Y(74298:74990)	Y(74760:74119)	Y(72070:71429)	Y(74886:74245)
odv-e26	N	N	Y(119135:118542)	N	N	N	N	N	N	N	N	N	N	N	N	Y(8035:8724)	Y(8067:8756)	Y(8035:8724)	Y(8076:8765)	Y(8064:8753)	N	Y(121839:121135)	Y(117780:117187)	N	N	N	N	N	N	N	N	Y(8078:8767)	Y(8067:8756)	Y(8067:8756)	N	N	N	Y(8057:8746)	N	N	N	N	N	N	Y(135404:135141)	N	N	N	N
odv-e56-pif-5	Y(6411:7529)	Y(14061:15071)	Y(7171:8295)	Y(6766:7881)	Y(12594:11530)	Y(7842:8957)	Y(7870:8985)	Y(7888:9003)	Y(7862:8977)	Y(7860:8975)	Y(7865:8980)	Y(7867:8982)	Y(6769:7884)	Y(6769:7884)	Y(14423:13359)	Y(121301:120177)	Y(118541:117414)	Y(119105:117981)	Y(119312:118179)	Y(119191:118064)	Y(6601:7722)	Y(140569:141429)	Y(7416:8540)	Y(9442:10518)	Y(9724:10800)	Y(9610:10686)	Y(9399:10475)	Y(9220:10296)	Y(12591:11527)	Y(22029:23120)	Y(13658:12600)	Y(119486:118359)	Y(119120:117993)	Y(118148:117021)	Y(13920:14990)	Y(6758:7873)	Y(14459:13395)	Y(119265:118138)	Y(6962:8059)	Y(14436:13372)	Y(14383:13319)	Y(14390:13326)	Y(14401:13337)	Y(14400:13336)	Y(6622:7743)	Y(14441:13377)	Y(14901:13834)	Y(14780:13713)	Y(14797:13730)
odv-e66	N	N	N	N	Y(30468:32453)	N	N	N	N	N	N	N	N	N	N	N	N	N	N	N	N	N	N	N	N	N	N	N	N	N	N	N	N	N	N	N	N	N	N	N	N	N	N	N	N	N	N	N	N
odv-ec27	Y(148715:147879)	Y(61504:62292)	Y(12234:11344)	Y(127340:126489)	Y(71765:72625)	Y(130237:129392)	Y(129557:128712)	Y(137293:136448)	Y(129889:129044)	Y(130141:129296)	Y(130314:129469)	Y(129991:129146)	Y(127764:126913)	Y(122844:121993)	Y(9481:10335)	Y(116467:117339)	Y(113731:114603)	Y(114325:115197)	Y(114550:115422)	Y(114381:115253)	Y(149485:148649)	Y(3941:2931)	Y(12454:11564)	Y(14722:15606)	Y(15001:15882)	Y(14890:15774)	Y(14679:15563)	Y(14497:15378)	Y(71329:72189)	Y(27219:26356)	Y(83929:84825)	Y(114648:115520)	Y(114283:115155)	Y(113311:114183)	Y(19062:18211)	Y(129010:128159)	Y(9519:10373)	Y(114455:115327)	Y(21428:22306)	Y(9496:10350)	Y(9445:10299)	Y(9451:10305)	Y(9461:10315)	Y(9461:10315)	Y(148925:148089)	Y(9501:10355)	Y(79271:80137)	Y(76757:77623)	Y(79573:80439)
odv-ec43	Y(70393:69323)	Y(64094:65158)	Y(40778:41953)	Y(55965:54895)	Y(39806:40870)	Y(58429:57359)	Y(57737:56667)	Y(65455:64385)	Y(58067:56997)	Y(58339:57269)	Y(58481:57411)	Y(58194:57124)	Y(56426:55356)	Y(51566:50496)	Y(86558:87643)	Y(88301:87126)	Y(87659:86484)	Y(88309:87134)	Y(88285:87110)	Y(88425:87250)	Y(68408:67338)	Y(34286:35479)	Y(39942:41117)	Y(96567:97637)	Y(96963:98033)	Y(96737:97807)	Y(96703:97773)	Y(96514:97584)	Y(39857:40921)	Y(101524:102597)	Y(48751:49872)	Y(88536:87361)	Y(88169:86994)	Y(87196:86021)	Y(106099:107199)	Y(57637:56567)	Y(87234:88319)	Y(88430:87255)	Y(92343:93482)	Y(87670:88755)	Y(87075:88160)	Y(87143:88228)	Y(88223:89308)	Y(88033:89118)	Y(70036:68966)	Y(86788:87873)	Y(45273:46337)	Y(45258:46322)	Y(45434:46498)
p10	N	N	N	N	N	N	N	N	N	N	N	N	N	N	N	N	N	N	N	N	N	N	N	N	N	N	N	N	N	N	N	N	N	N	N	N	N	N	N	N	N	N	N	N	N	N	N	N	N
p12	Y(73344:73652)	N	Y(50451:50792)	Y(58990:59295)	Y(59284:59613)	Y(61448:61768)	Y(60756:61076)	Y(68474:68794)	Y(61086:61406)	Y(61358:61678)	Y(61500:61820)	Y(61213:61533)	Y(59448:59753)	Y(54588:54893)	Y(83325:82957)	Y(81267:80890)	Y(80554:80183)	Y(81272:80895)	Y(81104:80727)	Y(81393:81022)	Y(71362:71670)	Y(47548:47892)	Y(49686:50027)	Y(93512:93159)	Y(93908:93555)	Y(93682:93329)	Y(93648:93295)	Y(93459:93106)	Y(58862:59191)	Y	Y(71605:71925)	Y(81572:81201)	Y(81135:80764)	Y(80232:79861)	Y(101862:101497)	Y(60659:60964)	Y(84001:83633)	Y(81325:80948)	Y(88553:88194)	Y(84437:84069)	Y(83842:83474)	Y(83910:83542)	Y(84990:84622)	Y(84800:84432)	Y(72990:73298)	Y(83555:83187)	Y(66580:66909)	Y(63887:64216)	Y(66706:67035)
p13	Y(65454:66284)	N	N	Y(51561:52394)	Y(29702:30502)	Y(53922:54773)	Y(53230:54081)	Y(60948:61799)	Y(53564:54415)	Y(53845:54696)	Y(53962:54813)	Y(53694:54545)	Y(51698:52531)	Y(46838:47671)	Y(90908:90078)	N	N	N	N	N	Y(63475:64311)	N	N	Y(100984:100070)	Y(101386:100466)	Y(101153:100239)	Y(101119:100205)	Y(100937:100017)	Y(29737:30537)	Y(103733:102897)	Y(42276:43073)	N	N	N	N	Y(53221:54054)	Y(91584:90754)	N	N	Y(92021:91191)	Y(91424:90594)	Y(91492:90662)	Y(92572:91742)	Y(92384:91554)	Y(65103:65939)	Y(91138:90308)	Y(38319:39128)	Y(38335:39147)	Y(38480:39289)
p18	Y(86241:85756)	Y(5343:5855)	Y(60234:59758)	Y(69735:69298)	Y(67854:67366)	Y(70847:70374)	Y(70154:69681)	Y(77874:77401)	Y(70481:70008)	Y(70755:70282)	Y(70900:70427)	Y(70613:70140)	Y(70235:69756)	Y(65375:64896)	Y(73534:74022)	Y(71205:71690)	Y(70523:71008)	Y(71210:71695)	Y(71050:71535)	Y(70564:71049)	Y(84256:83771)	Y(56588:56094)	Y(59470:58994)	Y(83289:83771)	Y(83691:84173)	Y(83460:83942)	Y(83431:83913)	Y(83244:83726)	Y(67419:66931)	Y(87413:87910)	Y(80140:79637)	Y(71538:72023)	Y(71083:71568)	Y(70203:70688)	Y(92620:93099)	Y(71446:70967)	Y(74210:74698)	Y(70496:70981)	Y(79579:80055)	Y(74618:75106)	Y(74046:74534)	Y(74113:74601)	Y(75190:75678)	Y(75006:75494)	Y(85871:85386)	Y(73722:74252)	Y(75335:74850)	Y(72645:72160)	Y(75461:74976)
p24	Y(13520:12834)	N	Y(26892:26326)	Y(14498:13782)	Y(50737:51345)	Y(15676:14930)	Y(15093:14347)	Y(15111:14365)	Y(15318:14572)	Y(15704:14955)	Y(15704:14958)	Y(15447:14698)	Y(14450:13737)	Y(14450:13737)	Y(112229:112975)	Y(100968:101555)	Y(100282:100869)	Y(100893:101480)	Y(100872:101459)	Y(100935:101522)	Y(13686:12997)	Y(16299:15685)	Y(28218:27646)	Y(130928:130188)	Y(131315:130575)	Y(130319:129579)	Y(130280:129540)	Y(130865:130125)	Y(50246:50899)	Y(115500:114733)	Y(63129:63662)	Y(101123:101710)	Y(100750:101337)	Y(99784:100371)	Y(132522:133193)	Y(14457:13744)	Y(112169:112915)	Y(101015:101602)	Y(109521:110312)	Y(113161:113907)	Y(112146:112892)	Y(112189:112935)	Y(113705:114451)	Y(113516:114262)	Y(13709:13104)	Y(111723:112469)	Y(57178:57789)	Y(54447:55058)	Y(57150:57761)
p26	Y(141574:142377)	N	Y(20774:20052)	Y(118951:119790)	N	Y(122909:123748)	Y(122237:123076)	Y(129974:130813)	Y(122549:123388)	Y(122810:123643)	Y(122976:123809)	Y(122666:123505)	Y(119321:120220)	Y(114461:115300)	Y(19457:18654)	Y(109113:109835)	Y(106279:107001)	Y(106878:107600)	Y(107127:107849)	Y(106929:107651)	Y(142360:143160)	Y(11456:10701)	Y(21229:20519)	Y(22234:21335)	Y(22510:21611)	Y(22402:21503)	Y(22191:21292)	Y(22006:21107)	N	Y(35546:36448)	N	Y(107203:107571)	Y(106830:107552)	Y(105864:106586)	Y(38320:39078)	Y(120624:121463)	Y(19481:18678)	Y(106996:107718)	Y(10604:9747)	Y(19464:18661)	Y(19417:18614)	Y(19424:18621)	Y(19429:18626)	Y(19428:18625)	Y(141806:142606)	Y(19463:18660)	N	N	N
p33	Y(86240:86998)	Y(5341:4571)	Y(60233:60994)	Y(69779:70537)	Y(67914:68669)	Y(70859:71617)	Y(70166:70924)	Y(77886:78644)	Y(70493:71251)	Y(70767:71525)	Y(70912:71670)	Y(70625:71383)	Y(70237:70995)	Y(65377:66135)	Y(73532:72768)	Y(71206:70427)	Y(70524:69745)	Y(71211:70432)	Y(71051:70272)	Y(70565:69786)	Y(84255:85013)	Y(56587:57372)	Y(59469:60230)	Y(83290:82535)	Y(83692:82937)	Y(83461:82706)	Y(83432:82677)	Y(83245:82490)	Y(67479:68234)	Y(87332:86652)	Y(80207:80965)	Y(71539:70760)	Y(71084:70305)	Y(70204:69425)	Y(92621:91866)	Y(71448:72206)	Y(74208:73444)	Y(70497:69718)	Y(79580:78822)	Y(74616:73852)	Y(74044:73280)	Y(74111:73347)	Y(75188:74424)	Y(75004:74240)	Y(85870:86628)	Y(73762:72998)	Y(75399:76154)	Y(72709:73464)	Y(75525:76280)
P43	N	N	N	N	N	N	N	N	N	N	N	N	N	N	N	Y(28409:27321)	Y(27582:26494)	Y(28411:27323)	Y(28130:27042)	Y(27592:26504)	N	N	N	N	N	N	N	N	N	Y(129239:128115)	N	Y(28625:27537)	Y(28186:27098)	Y(27455:26376)	N	N	N	Y(27892:26804)	Y(99010:97850)	N	N	N	N	N	N	N	N	N	N
p47	Y(131751:132944)	Y(45434:44256)	Y(99455:100654)	Y(110240:111439)	Y(48593:49792)	Y(113219:114439)	Y(112541:113761)	Y(120277:121497)	Y(112855:114075)	Y(113119:114339)	Y(113287:114507)	Y(112966:114186)	Y(110798:111997)	Y(105938:107137)	Y(31005:29767)	Y(29616:28417)	Y(28789:27590)	Y(29618:28419)	Y(29337:28138)	Y(28799:27600)	Y(132435:133628)	Y(96468:97673)	Y(98315:99514)	Y(32011:30812)	Y(32279:31080)	Y(32181:30982)	Y(31964:30765)	Y(31775:30576)	Y(48147:49346)	Y(43237:42056)	Y(61120:62331)	Y(29832:28633)	Y(29393:28194)	Y(28662:27463)	Y(45096:43924)	Y(111896:113095)	Y(30731:29493)	Y(29099:27900)	Y(32011:30827)	Y(30822:29584)	Y(30681:29443)	Y(30747:29509)	Y(31010:29772)	Y(30828:29590)	Y(132084:133277)	Y(30712:29474)	Y(54385:55767)	Y(51493:52689)	Y(54369:55751)
p48-p45	Y(72224:73357)	Y(33628:32420)	Y(49295:50458)	Y(57885:59015)	Y(58060:59229)	Y(60331:61458)	Y(59639:60766)	Y(67357:68484)	Y(59969:61096)	Y(60241:61368)	Y(60383:61510)	Y(60096:61223)	Y(58343:59473)	Y(53483:54613)	Y(84458:83325)	Y(82411:81248)	Y(81698:80535)	Y(82416:81253)	Y(82248:81085)	Y(82537:81374)	Y(70242:71375)	Y(46398:47567)	Y(48530:49693)	Y(94635:93499)	Y(95031:93895)	Y(94805:93669)	Y(94771:93635)	Y(94582:93446)	Y(57638:58807)	Y(98852:97659)	Y(70416:71600)	Y(82716:81553)	Y(82279:81116)	Y(81376:80213)	Y(103024:101855)	Y(59554:60684)	Y(85134:84001)	Y(82469:81306)	Y(89727:88540)	Y(85570:84437)	Y(84975:83842)	Y(85043:83910)	Y(86123:84990)	Y(85933:84800)	Y(71870:73003)	Y(84688:83555)	Y(65229:66548)	Y(62536:63855)	Y(65355:66674)
p49	Y(150392:149007)	Y(59634:60962)	Y(13958:12510)	Y(128998:127616)	Y(11260:9878)	Y(131952:130570)	Y(131272:129890)	Y(139008:137626)	Y(131603:130221)	Y(131855:130473)	Y(132029:130647)	Y(131706:130324)	Y(129422:128040)	Y(124502:123120)	Y(7804:9210)	Y(114709:116139)	Y(111973:113403)	Y(112567:113997)	Y(112789:114219)	Y(112623:114053)	Y(151168:149783)	Y(5835:4303)	Y(14179:12773)	Y(13004:14431)	Y(13283:14710)	Y(13172:14599)	Y(12961:14388)	Y(12779:14206)	Y(11257:9875)	Y(28998:27550)	Y(11058:9718)	Y(112887:114317)	Y(112522:113952)	Y(111550:112980)	Y(20769:19318)	Y(130668:129286)	Y(7842:9248)	Y(112694:114124)	Y(19595:21028)	Y(7819:9225)	Y(7768:9174)	Y(7774:9180)	Y(7784:9190)	Y(7784:9190)	Y(150608:149223)	Y(7824:9230)	Y(11860:10487)	Y(11735:10362)	Y(11773:10400)
p6.9	Y(74834:75064)	Y	Y(51894:52133)	Y(60540:60761)	Y(60824:61000)	Y(63029:63262)	Y(62337:62570)	Y(70055:70288)	Y(62667:62900)	Y(62939:63172)	Y(63081:63314)	Y(62794:63027)	Y(60998:61219)	Y(56138:56359)	Y(81737:81408)	Y(79740:79543)	Y(79033:78836)	Y(79745:79548)	Y(79574:79377)	Y(79878:79681)	Y(72849:73082)	Y(49139:49321)	Y(51130:51369)	Y(91907:91635)	Y(92303:92031)	Y(92077:91805)	Y(92043:91771)	Y(91854:91582)	Y(60402:60578)	Y	Y(73143:73328)	Y(80051:79854)	Y(79614:79417)	Y(78711:78514)	Y(100141:99830)	Y(62209:62430)	Y(82413:82084)	Y(79795:79598)	Y	Y(82849:82499)	Y(82254:81925)	Y(82322:81993)	Y(83402:83073)	Y(83212:82883)	Y(74477:74710)	Y(81967:81638)	Y(68142:68291)	Y(65449:65598)	Y(68268:68417)
P78-83	Y(2190:790)	N	Y(2510:735)	Y(2194:806)	N	Y(2222:804)	Y(2222:804)	Y(2222:804)	Y(2213:804)	Y(2228:804)	Y(2231:804)	Y(2219:804)	Y(2194:806)	Y(2194:806)	Y(1979:738)	Y(2405:768)	Y(2396:768)	Y(2405:768)	Y(2396:768)	Y(2393:768)	Y(2319:790)	Y(31653:32567)	Y(2510:735)	Y(1991:738)	Y(1991:738)	Y(1991:738)	Y(1991:738)	Y(1991:738)	N	Y(17988:15952)	Y(45046:47568)	Y(2405:768)	Y(2399:768)	Y(2399:768)	Y(3189:1531)	Y(2191:806)	Y(1979:738)	Y(2387:768)	Y(2474:774)	Y(1979:738)	Y(1973:738)	Y(1979:738)	Y(1979:738)	Y(1979:738)	Y(2358:790)	Y(1979:738)	N	N	N
p94	Y(114989:117448)	N	N	Y(94577:96700)	N	Y(97084:99234)	Y(96391:98541)	Y(104130:106280)	Y(96696:98855)	Y(96955:99114)	Y(97126:99285)	Y(96805:98964)	Y(95117:97258)	Y(90257:92398)	N	Y(107350:104939)	N	N	N	N	Y(112984:115488)	N	Y(21297:23684)	N	N	N	N	N	N	N	N	N	N	N	N	Y(96258:98372)	N	N	N	N	N	N	N	N	Y(114571:116469)	N	N	N	N
parp-like	N	N	N	N	N	N	N	N	N	N	N	N	N	N	N	N	N	N	N	N	N	N	N	N	N	N	N	N	N	N	N	N	N	N	N	N	N	N	N	N	N	N	N	N	N	N	N	N	N
pcna	N	N	Y(93328:94068)	N	N	N	N	N	N	N	N	N	N	N	N	N	N	N	N	N	N	Y(93212:94075)	Y(92495:92713)	Y(64198:63407)	Y(64494:63703)	Y(64369:63578)	Y(64172:63381)	Y(64006:63215)	N	N	N	N	N	N	N	N	N	N	N	N	N	N	N	N	N	N	N	N	N
PE38	Y(90061:90900)	Y(22750:24213)	Y(4442:3534)	Y(73161:74540)	Y(17207:16299)	Y(74401:75876)	Y(73709:75184)	Y(81451:82926)	Y(74017:75492)	Y(74292:75767)	Y(74437:75912)	Y(74170:75645)	Y(73619:74995)	Y(68759:70135)	Y(70361:69510)	Y(123677:124606)	Y(120993:121922)	Y(121496:122425)	Y(121676:122605)	Y(121643:122572)	Y(88105:88929)	Y(138396:137569)	Y(4436:3531)	Y(117698:117180)	Y(118070:117552)	Y(117088:116570)	Y(117044:116526)	Y(117621:117103)	Y(17158:16295)	Y(83584:82889)	Y(11799:11074)	Y(121934:122863)	Y(121512:122441)	Y(120543:121472)	Y(131701:131964)	Y(74830:76200)	Y(71037:70186)	Y(121731:122660)	Y(75739:74792)	Y(71445:70594)	Y(70873:70022)	Y(70940:70089)	Y(72017:71166)	Y(71833:70982)	Y(89720:90544)	Y(70654:69740)	Y(21644:20370)	Y(21721:20336)	Y(21827:20358)
PEP	N	N	N	N	Y(14423:13809)	N	N	N	N	N	N	N	N	N	N	N	N	N	N	N	N	N	N	N	N	N	N	N	Y(14420:13806)	N	N	N	N	N	N	N	N	N	N	N	N	N	N	N	N	N	N	Y(16150:15443)	Y(16165:15458)
pep-1	N	N	N	N	N	N	N	N	N	N	N	N	N	N	N	N	N	N	N	N	N	N	N	N	N	N	N	N	N	N	N	N	N	N	N	N	N	N	N	N	N	N	N	N	N	N	Y(16260:15562)	N	N
pif-0-p74	Y(144730:142757)	Y(47340:45436)	Y(17832:19754)	Y(123019:121079)	Y(45080:43047)	Y(126098:124152)	Y(125426:123480)	Y(133163:131217)	Y(125753:123807)	Y(126008:124062)	Y(126174:124228)	Y(125855:123909)	Y(123449:121509)	Y(118529:116589)	Y(16188:18254)	Y(112141:110204)	Y(109310:107373)	Y(109907:107970)	Y(110160:108223)	Y(109960:108023)	Y(145510:143537)	Y(8436:10376)	Y(18297:20219)	Y(18990:20966)	Y(19266:21242)	Y(19158:21134)	Y(18947:20923)	Y(18762:20738)	Y(45131:43098)	Y(31431:33389)	Y(59215:57188)	Y(110230:108293)	Y(109859:107922)	Y(108893:106956)	Y(26871:28889)	Y(124692:122752)	Y(16213:18279)	Y(110026:108089)	Y(16479:14521)	Y(16201:18261)	Y(16148:18214)	Y(16155:18221)	Y(16166:18226)	Y(16165:18225)	Y(144956:142983)	Y(16180:18261)	Y(50524:48458)	Y(50491:48425)	Y(50664:48598)
pif-1	Y(43394:44983)	Y(71187:69574)	Y(36215:34620)	Y(33519:35108)	Y(52626:54251)	Y(36362:37945)	Y(35790:37373)	Y(43506:45089)	Y(36018:37601)	Y(36403:37986)	Y(36406:37989)	Y(36136:37719)	Y(33448:35037)	Y(28588:30177)	Y(103443:105029)	Y(91874:93466)	Y(91251:92834)	Y(91871:93454)	Y(91846:93429)	Y(91904:93487)	Y(42212:43801)	Y(23836:25446)	Y(35034:33439)	Y(129167:127608)	Y(129553:127994)	Y(128558:126999)	Y(128517:126958)	Y(129103:127544)	Y(52179:53804)	Y(113840:112239)	Y(64995:66638)	Y(92095:93678)	Y(91740:93323)	Y(90756:92339)	Y(152041:153645)	Y(34958:36547)	Y(103674:105260)	Y(91991:93574)	Y(133045:131447)	Y(104266:105852)	Y(103223:104809)	Y(103291:104877)	Y(104813:106399)	Y(104628:106214)	Y(41488:43077)	Y(103228:104814)	Y(59628:61244)	Y(56929:58545)	Y(59748:61364)
pif-2	Y(42120:43379)	Y(50538:51692)	Y(115335:114187)	Y(32305:33501)	Y(32470:33597)	Y(35093:36334)	Y(34521:35762)	Y(42237:43478)	Y(34749:35990)	Y(35134:36375)	Y(35137:36378)	Y(34867:36108)	Y(32234:33430)	Y(27374:28570)	Y(126205:127356)	Y(12326:13474)	Y(12354:13502)	Y(12326:13474)	Y(12374:13522)	Y(12359:13507)	Y(40938:42197)	Y(116939:115794)	Y(113960:112812)	Y(143221:144369)	Y(143617:144765)	Y(142617:143765)	Y(142577:143725)	Y(143161:144309)	Y(32505:33632)	Y(117992:119110)	Y(43281:44429)	Y(12344:13492)	Y(12332:13480)	Y(12332:13480)	Y(116272:117495)	Y(33744:34940)	Y(126092:127243)	Y(12321:13469)	Y(112615:113769)	Y(127137:128288)	Y(126121:127272)	Y(126164:127315)	Y(127680:128831)	Y(127464:128615)	Y(40214:41473)	Y(125646:126797)	Y(39172:40290)	Y(39167:40285)	Y(39333:40451)
pif-3	Y(57574:58185)	Y(63353:63940)	Y(37828:38445)	Y(45618:46247)	Y(24954:25526)	Y(47892:48536)	Y(47313:47957)	Y(55031:55675)	Y(47538:48182)	Y(47928:48572)	Y(47936:48580)	Y(47658:48302)	Y(45552:46181)	Y(40692:41321)	Y(93508:94107)	Y(91341:90727)	Y(90718:90104)	Y(91349:90735)	Y(91324:90710)	Y(91371:90757)	Y(55233:55844)	Y(29582:30208)	Y(36460:37254)	Y(109827:109177)	Y(110204:109554)	Y(109996:109346)	Y(109951:109301)	Y(109755:109105)	Y(24988:25560)	Y(124019:124645)	Y(27915:28490)	Y(91575:90961)	Y(91209:90595)	Y(90236:89622)	Y(140718:140107)	Y(47074:47703)	Y(93762:94361)	Y(91471:90857)	Y(103135:102512)	Y(94343:94942)	Y(93305:93904)	Y(93373:93972)	Y(94892:95491)	Y(94704:95303)	Y(54543:55154)	Y(93316:93915)	Y(30075:30650)	Y(30073:30648)	Y(30247:30822)
pif-4	Y(81417:80899)	Y(54817:54311)	Y(55399:54881)	Y(64915:64409)	Y(63162:62677)	Y(65998:65486)	Y(65306:64794)	Y(73025:72513)	Y(65637:65125)	Y(65908:65396)	Y(66051:65539)	Y(65764:65252)	Y(65373:64867)	Y(60513:60007)	Y(79026:79547)	Y(76079:76627)	Y(75392:75913)	Y(76084:76632)	Y(75924:76445)	Y(75433:75981)	Y(79437:78919)	Y(51585:51064)	Y(54635:54117)	Y(88198:88716)	Y(88600:89118)	Y(88369:88887)	Y(88340:88858)	Y(88151:88669)	Y(62740:62255)	Y(92436:92957)	Y(75450:74965)	Y(76411:76932)	Y(75952:76473)	Y(75072:75593)	Y(97600:98121)	Y(66584:66078)	Y(79702:80223)	Y(75369:75917)	Y(84459:84980)	Y(80116:80637)	Y(79544:80065)	Y(79611:80132)	Y(80691:81212)	Y(80501:81022)	Y(81053:80535)	Y(79256:79777)	Y(70628:70143)	Y(67940:67455)	Y(70754:70269)
pif-6	Y(101054:100689)	Y(39404:38982)	Y(75479:75069)	Y(84060:83686)	Y(86933:87310)	Y(86882:86478)	Y(86190:85786)	Y(93932:93528)	Y(86492:86088)	Y(86760:86356)	Y(86926:86522)	Y(86622:86221)	Y(84599:84225)	Y(79739:79365)	Y(55166:54765)	Y(54154:54558)	Y(53326:53730)	Y(54156:54560)	Y(53851:54255)	Y(53351:53755)	Y(99062:98697)	Y(72818:72426)	Y(74700:74290)	Y(58158:58556)	Y(58452:58850)	Y(58327:58725)	Y(58130:58528)	Y(57963:58361)	Y(86498:86875)	Y(68140:67733)	Y(101395:101784)	Y(54335:54739)	Y(53919:54323)	Y(53194:53598)	Y(74923:74534)	Y(85739:85365)	Y(55826:55425)	Y(53627:54031)	Y(60088:59711)	Y(56249:55848)	Y(55672:55271)	Y(55739:55338)	Y(56810:56409)	Y(56632:56231)	Y(100656:100291)	Y(55380:54979)	Y(97034:97414)	Y(94568:94948)	Y(97343:97723)
pif-7	Y(70556:70377)	Y(63940:64119)	Y(40316:40486)	Y(56128:55949)	Y(36856:37008)	Y(58592:58413)	Y(57900:57721)	Y(65618:65439)	Y(58230:58051)	Y(58502:58323)	Y(58644:58465)	Y(58357:58178)	Y(56589:56410)	Y(51729:51550)	Y(86367:86543)	Y(88504:88325)	Y(87862:87683)	Y(88512:88333)	Y(88488:88309)	Y(88628:88449)	Y(68571:68392)	Y(38248:38081)	Y	Y(96398:96583)	Y(96794:96979)	Y(96568:96753)	Y(96534:96719)	Y(96345:96530)	Y	Y	Y(48269:48421)	Y(88739:88560)	Y(88372:88193)	Y(87399:87220)	Y(105923:106093)	Y(57800:57621)	Y(87043:87219)	Y(88633:88454)	Y(92160:92333)	Y(87479:87655)	Y(86887:87060)	Y(86952:87128)	Y(88032:88208)	Y(87842:88018)	Y(70199:70020)	Y(86597:86773)	Y(44688:44834)	Y(44655:44801)	Y(44849:44995)
pif-8	Y(93395:90963)	Y(76439:78844)	Y(68278:65711)	Y(77056:74624)	Y(76239:74293)	Y(78408:75973)	Y(77716:75281)	Y(85458:83023)	Y(78030:75589)	Y(78308:75864)	Y(78453:76009)	Y(78177:75742)	Y(77523:75079)	Y(72663:70219)	Y(66932:69382)	Y(62353:64866)	Y(61517:64030)	Y(62355:64868)	Y(62055:64562)	Y(61542:64055)	Y(91423:88985)	Y(64313:61794)	Y(67498:64907)	Y(77582:79954)	Y(77988:80348)	Y(77753:80125)	Y(77716:80088)	Y(77521:79893)	Y(75803:73857)	Y(80373:82805)	Y(89880:87910)	Y(62535:65048)	Y(62116:64629)	Y(61392:63905)	Y(85864:88416)	Y(78733:76289)	Y(67591:70041)	Y(61818:64331)	Y(72206:74731)	Y(68015:70465)	Y(67441:69891)	Y(67508:69958)	Y(68587:71037)	Y(68403:70853)	Y(93038:90600)	Y(67145:69595)	Y(84601:82604)	Y(82119:80122)	Y(84903:82906)
pk-1	Y(2189:3007)	N	Y(2509:3312)	Y(2193:3029)	Y(1153:1989)	Y(2221:3114)	Y(2221:3114)	Y(2221:3114)	Y(2212:3105)	Y(2227:3120)	Y(2230:3123)	Y(2218:3111)	Y(2193:3029)	Y(2193:3029)	Y(1994:2797)	Y(2404:3228)	Y(2395:3222)	Y(2404:3228)	Y(2395:3222)	Y(2392:3219)	Y(2318:3136)	Y(135567:136421)	Y(2509:3312)	Y(2009:2827)	Y(2009:2827)	Y(2009:2827)	Y(2009:2827)	Y(2009:2827)	Y(1153:1989)	Y(17996:18787)	Y(1084:2238)	Y(2404:3228)	Y(2398:3222)	Y(2398:3222)	Y(3191:4015)	Y(2190:3026)	Y(1994:2797)	Y(2386:3210)	Y(2467:3270)	Y(1994:2797)	Y(1988:2791)	Y(1994:2797)	Y(1994:2797)	Y(1994:2797)	Y(2357:3175)	Y(1928:2797)	Y(1257:2096)	Y(1260:2021)	Y(1254:2093)
pk-2	N	N	N	N	N	N	N	N	N	N	N	N	N	N	N	Y(94786:94139)	Y(94155:93478)	Y(94775:94098)	Y(94749:94072)	Y(94808:94131)	N	N	N	N	N	N	N	N	N	N	N	Y(94999:94322)	Y(94644:93967)	Y(93660:92983)	N	N	N	Y(94895:94218)	N	N	N	N	N	N	N	N	N	N	N
pkip	Y(40614:41123)	N	Y(101173:100673)	Y(30471:30998)	N	Y(33464:33958)	Y(32889:33383)	Y(40605:41099)	Y(33120:33614)	Y(33505:33999)	Y(33508:34002)	Y(33238:33732)	Y(30398:30925)	Y(25538:26065)	Y(124571:125080)	Y(16137:15628)	Y(16165:15656)	Y(16137:15628)	Y(16186:15677)	Y(16170:15661)	Y(39432:39941)	Y(112060:112617)	Y(100033:99533)	Y(141627:142130)	Y(142023:142526)	Y(141023:141526)	Y(140983:141486)	Y(141567:142070)	N	Y(116850:117419)	N	Y(16159:15650)	Y(16143:15634)	Y(16147:15638)	Y(108610:109149)	Y(31908:32435)	Y(124457:124966)	Y(16136:15627)	Y(111630:112145)	Y(125502:126011)	Y(124486:124995)	Y(124529:125038)	Y(126044:126553)	Y(125828:126337)	Y(38708:39217)	Y(124011:124520)	N	N	N
polyhedrin	Y(1:741)	Y(1:741)	Y(1:738)	Y(1:741)	Y(1:744)	Y(1:741)	Y(1:741)	Y(1:741)	Y(1:741)	Y(1:741)	Y(1:741)	Y(1:741)	Y(1:741)	Y(1:741)	Y(1:741)	Y(1:738)	Y(1:738)	Y(1:738)	Y(1:738)	Y(1:738)	Y(1:741)	Y(133228:133965)	Y(1:738)	Y(1:741)	Y(1:741)	Y(1:741)	Y(1:741)	Y(1:741)	Y(1:744)	Y(15180:15920)	Y(1:747)	Y(1:738)	Y(1:738)	Y(1:738)	Y(786:1523)	Y(1:741)	Y(1:741)	Y(1:738)	Y(1:741)	Y(1:741)	Y(1:741)	Y(1:741)	Y(1:741)	Y(1:741)	Y(1:741)	Y(1:741)	Y(1:747)	Y(1:747)	Y(1:747)
polynucleotide-kinase-ligase	N	N	Y(45420:43378)	N	N	N	N	N	N	N	N	N	N	N	N	N	N	N	N	N	N	N	Y(44589:42547)	N	N	N	N	N	N	N	N	N	N	N	N	N	N	N	N	N	N	N	N	N	N	N	N	N	N
PP34	Y(53735:52770)	N	N	N	N	N	N	N	N	N	N	N	N	N	N	Y(101965:102936)	Y(101279:102226)	Y(101890:102834)	Y(101869:102816)	Y(101932:102876)	Y(52550:51573)	N	N	N	N	N	N	N	N	N	N	Y(102120:103061)	Y(101747:102688)	Y(100781:101722)	N	N	N	Y(102012:102953)	N	N	N	N	N	N	Y(51871:50894)	N	N	N	N
proteinphosphatase	N	N	N	N	N	N	N	N	N	N	N	N	N	N	N	N	N	N	N	N	N	N	N	N	N	N	N	N	N	N	N	N	N	N	N	N	N	N	N	N	N	N	N	N	N	N	N	N	N
ptp2	Y(33921:33382)	N	Y(123745:124227)	Y(24037:23534)	N	Y(26796:26299)	Y(26212:25715)	Y(33932:33435)	Y(26440:25943)	Y(26828:26331)	Y(26842:26345)	Y(26561:26064)	Y(23960:23457)	N	N	Y(125636:126142)	Y(122943:123449)	Y(123455:123961)	Y(123700:124206)	Y(123648:124154)	Y(32765:32226)	N	Y(122528:123010)	Y(134993:134499)	Y(135383:134889)	Y(134384:133890)	Y(134343:133849)	Y(134932:134438)	N	N	N	Y(123898:124404)	Y(123368:123874)	Y(122399:122905)	N	Y(25473:24970)	N	Y(123682:124188)	N	N	N	N	N	N	Y(32034:31495)	N	Y(80451:80936)	Y(77937:78422)	Y(80753:81238)
putative-histidinol-phosphatase	N	N	N	N	N	N	N	N	N	N	N	N	N	N	N	N	N	N	N	N	N	N	N	N	N	N	N	N	N	N	N	N	N	N	N	N	N	N	N	N	N	N	N	N	N	N	N	N	N
putative-methyltransferase	Y(100705:99878)	N	Y(75118:74324)	Y(83693:82893)	N	Y(86488:85592)	Y(85796:84900)	Y(93538:92642)	Y(86098:85202)	Y(86366:85470)	Y(86532:85636)	Y(86231:85335)	Y(84232:83432)	Y(79372:78572)	Y(54796:53972)	Y(54536:55324)	Y(53708:54496)	Y(54538:55326)	Y(54233:55021)	Y(53733:54521)	Y(98713:97898)	Y(72445:71612)	Y(74339:73545)	N	N	N	N	N	N	N	N	Y(54717:55505)	Y(54301:55089)	Y(53576:54364)	N	Y(85372:84572)	Y(55456:54632)	Y(54009:54797)	N	Y(55879:55055)	Y(55302:54478)	Y(55369:54545)	Y(56440:55616)	Y(56262:55438)	Y(100307:99492)	Y(55031:54186)	N	N	N
ribokinase	N	N	N	N	N	N	N	N	N	N	N	N	N	N	N	Y	Y	Y	Y	Y	N	N	N	N	N	N	N	N	N	N	N	Y	Y	Y	N	N	N	Y	N	N	N	N	N	N	N	N	N	N	N
rlp	N	N	N	N	N	N	N	N	N	N	N	N	N	N	N	N	N	N	N	N	N	N	N	N	N	N	N	N	N	N	N	N	N	N	N	N	N	N	N	N	N	N	N	N	N	N	N	N	N
rr1	Y(153547:151262)	N	N	Y(132362:129810)	N	Y(135450:132823)	Y(134767:132143)	Y(142506:139879)	Y(135089:132474)	Y(135353:132726)	Y(135515:132900)	Y(135192:132577)	Y(132750:130234)	Y(127830:125314)	N	N	N	N	N	N	Y(154341:152056)	N	N	Y(149430:147088)	Y(149825:147483)	Y(148826:146484)	Y(148785:146443)	Y(149370:147028)	N	Y(15002:12720)	Y(36925:35078)	N	N	N	Y(144527:146314)	Y(134035:131480)	N	N	N	N	N	N	N	N	Y(153781:151496)	N	Y(110582:108708)	Y(108185:106242)	Y(110891:109017)
rr2b	Y(50770:51711)	N	N	N	N	Y(44359:45300)	Y(43788:44729)	Y(51504:52445)	Y(44016:44957)	Y(44399:45340)	Y(44402:45343)	Y(44133:45074)	N	N	N	N	N	N	N	N	Y(49590:50531)	N	N	Y(120623:119667)	Y(121006:120050)	Y(120014:119058)	Y(119970:119014)	Y(120556:119600)	N	Y(523:1530)	Y(37121:38230)	N	N	N	Y(117517:118596)	N	N	N	N	N	N	N	N	N	Y(48868:49809)	N	Y(110710:111798)	Y(108275:109363)	Y(111019:112107)
superoxide-dismutase	Y(57142:56687)	N	Y(107780:107328)	Y(45549:45088)	Y(42764:42294)	Y(47386:46931)	Y(46813:46358)	Y(54531:54076)	Y(47038:46583)	Y(47428:46973)	Y(47430:46975)	Y(47158:46703)	Y(45483:45022)	Y(40623:40162)	Y(100082:100561)	Y(22003:22458)	Y(21998:22453)	Y(22005:22460)	Y(21989:22444)	Y(22046:22501)	Y(54785:54330)	Y(105607:105149)	Y(106591:106139)	Y(115161:115616)	Y(115524:115979)	Y(114551:115006)	Y(114507:114962)	Y(115075:115530)	Y(42815:42345)	Y(123063:122569)	Y(53367:52897)	Y(21984:22439)	Y(22057:22512)	Y(21335:21790)	Y(141282:141746)	Y(47005:46544)	Y(100323:100802)	Y(21908:22363)	Y(103683:104159)	Y(100904:101383)	Y(99867:100346)	Y(99935:100414)	Y(101453:101932)	Y(101266:101745)	Y(54095:53640)	Y(99877:100356)	Y(48156:47683)	Y(48122:47649)	Y(48224:47826)
tlp-20	Y(93364:93951)	N	Y(68142:68600)	Y(77025:77615)	Y(76208:76756)	Y(78377:78973)	Y(77685:78281)	Y(85427:86023)	Y(77999:78586)	Y(78277:78864)	Y(78422:79018)	Y(78146:78733)	Y(77492:78082)	Y(72632:73222)	Y(67002:66325)	Y(62387:61842)	Y(61551:61006)	Y(62389:61844)	Y(62089:61541)	Y(61576:61031)	Y(91392:91979)	Y(64336:64881)	Y	Y(77496:76789)	Y(77902:77195)	Y(77667:76960)	Y(77630:76923)	Y(77435:76728)	Y(75772:76320)	Y(80314:79460)	Y(89849:90382)	Y(62569:62024)	Y(62150:61605)	Y(61426:60881)	Y(85994:85314)	Y(78702:79292)	Y(67661:66984)	Y(61852:61307)	Y(72237:71515)	Y(68085:67408)	Y(67511:66834)	Y(67578:66901)	Y(68657:67980)	Y(68473:67796)	Y(93007:93594)	Y(67215:66538)	Y(84582:85232)	Y(82100:82750)	Y(84884:85534)
transmembrane-domain	N	N	N	N	N	N	N	N	N	N	N	N	N	N	N	N	N	N	N	N	N	N	N	N	N	N	N	N	N	N	N	N	N	N	N	N	N	N	N	N	N	N	N	N	N	N	N	N	N
v-cath	Y(29489:30502)	N	Y(29682:28708)	Y(18814:17792)	Y(7549:8568)	Y(19991:18978)	Y(19408:18395)	Y(27127:26114)	Y(19636:18623)	Y(20004:18991)	Y(20019:19006)	Y(19756:18743)	Y(18759:17740)	Y(18759:17740)	Y(47291:46188)	Y(98158:99129)	Y(97475:98446)	Y(98091:99062)	Y(98066:99037)	Y(98128:99099)	Y(28336:29361)	Y(110304:109312)	N	Y(61468:60434)	Y(61762:60728)	Y(61637:60603)	Y(61440:60406)	Y(61273:60239)	Y(7546:8565)	Y(64363:65361)	Y(29710:28727)	Y(98316:99287)	Y(97956:98927)	Y(96977:97948)	Y(72745:73827)	Y(18767:17742)	Y(47434:46331)	Y(98208:99179)	Y(55144:56136)	Y(47091:45988)	Y(46934:45831)	Y(47001:45898)	Y(47268:46165)	Y(47093:45990)	Y(27606:28631)	Y(46988:45885)	Y(7962:8963)	Y(7904:8908)	Y(7934:8935)
v-ubiquitin	Y(138356:138054)	N	Y(109929:110159)	Y(115609:115367)	Y(39721:39434)	Y(118800:118561)	Y(118128:117889)	Y(125864:125625)	Y(118436:118197)	Y(118694:118455)	Y(118865:118626)	Y(118544:118305)	Y(116165:115923)	Y(111305:111063)	Y(24947:25198)	Y(25189:25422)	Y(24359:24592)	Y(25191:25424)	Y(24913:25146)	Y(24369:24602)	Y(139150:138848)	Y(103620:103378)	Y(108552:108782)	Y(26796:27032)	Y(27065:27301)	Y(26965:27201)	Y(26745:26981)	Y(26560:26796)	Y(39772:39485)	Y(37407:37646)	Y(48711:48418)	Y(25411:25644)	Y(24972:25205)	Y(24250:24483)	Y(39994:40446)	Y(117269:117027)	Y(24670:24921)	Y(24672:24905)	Y(26988:27254)	Y(24755:25006)	Y(24611:24862)	Y(24683:24934)	Y(24937:25188)	Y(24755:25006)	Y(138596:138294)	Y(24652:24903)	Y(45194:44910)	Y(45179:44877)	Y(45355:45071)
vef	Y(76722:79265)	N	N	N	N	N	N	N	N	N	N	N	N	N	N	N	N	N	N	N	Y(74740:77286)	Y(98887:>100881)	N	N	N	N	N	N	N	N	Y(53830:56610)	N	N	N	Y(59546:61897)	N	N	N	N	N	N	N	N	N	Y(76368:78914)	N	N	N	N
VEF-1	N	N	N	N	N	N	N	N	N	N	N	N	N	N	N	N	N	N	N	N	N	N	N	N	N	N	N	N	N	N	N	N	N	N	N	N	N	N	N	N	N	N	N	N	N	N	N	N	N
VEF-2	N	N	N	N	N	N	N	N	N	N	N	N	N	N	N	N	N	N	N	N	N	N	N	N	N	N	N	N	N	N	N	N	N	N	N	N	N	N	N	N	N	N	N	N	N	N	N	N	N
vef-3	N	N	N	N	N	N	N	N	N	N	N	N	N	N	N	N	N	N	N	N	N	N	N	N	N	N	N	N	N	N	N	N	N	N	N	N	N	N	N	N	N	N	N	N	N	N	N	N	N
vlf-1	Y(95811:96953)	Y(42375:41311)	Y(70834:71946)	Y(79497:80600)	Y(78455:79582)	Y(80893:82011)	Y(80201:81319)	Y(87943:89061)	Y(80506:81624)	Y(80787:81905)	Y(80938:82056)	Y(80653:81771)	Y(79963:81066)	Y(75103:76206)	Y(64415:63171)	Y(59433:58288)	Y(58597:57458)	Y(59435:58290)	Y(59138:58005)	Y(58622:57483)	Y(93833:94975)	Y(67460:68713)	Y(70054:71166)	Y(74893:73715)	Y(75299:74121)	Y(75064:73886)	Y(75027:73849)	Y(74832:73654)	Y(78018:79145)	Y(77379:76183)	Y(92272:93420)	Y(59615:58467)	Y(59196:58051)	Y(58472:57324)	Y(83472:82336)	Y(81174:82277)	Y(65074:63830)	Y(58898:57759)	Y(69354:68185)	Y(65498:64251)	Y(64924:63677)	Y(64991:63744)	Y(66070:64823)	Y(65886:64639)	Y(95448:96590)	Y(64628:63384)	Y(86974:88110)	Y(84504:85640)	Y(87276:88412)
vp1054	Y(121063:120053)	Y(79787:78846)	Y(88921:87791)	Y(99949:98939)	Y(103817:104809)	Y(102494:101460)	Y(101807:100773)	Y(109546:108512)	Y(102129:101092)	Y(102388:101354)	Y(102565:101528)	Y(102238:101201)	Y(100498:99488)	Y(95638:94628)	Y(40020:41075)	Y(40413:41510)	Y(39562:40659)	Y(40415:41512)	Y(40111:41208)	Y(39576:40673)	Y(119137:118127)	Y(87981:86893)	Y(88085:86955)	Y(41932:42942)	Y(42201:43211)	Y(42101:43111)	Y(41882:42892)	Y(41695:42705)	Y(103996:104988)	Y(53161:54261)	Y(122137:123132)	Y(40583:41680)	Y(40166:41263)	Y(39435:40532)	Y(53957:54955)	Y(101606:100596)	Y(40169:41224)	Y(39871:40968)	Y(41760:42869)	Y(39833:40888)	Y(39690:40739)	Y(39757:40806)	Y(40021:41070)	Y(39840:40895)	Y(120710:119700)	Y(39723:40778)	Y(118137:119135)	Y(115732:116730)	Y(118447:119445)
vp15	N	N	N	N	N	N	N	N	N	N	N	N	N	N	N	Y(66268:66648)	Y(65589:65969)	Y(66270:66650)	Y(66125:66505)	Y(65614:65994)	N	N	N	N	N	N	N	N	N	N	N	Y(66613:66993)	Y(66159:66539)	Y(65272:65652)	N	N	N	Y(65570:65950)	N	N	N	N	N	N	N	N	N	N	N
vp39	Y(89013:89990)	Y(83588:82641)	Y(62998:64011)	Y(71959:72945)	Y(70845:71705)	Y(73266:74246)	Y(72574:73554)	Y(80316:81296)	Y(72882:73862)	Y(73157:74137)	Y(73302:74282)	Y(73035:74015)	Y(72417:73403)	Y(67557:68543)	Y(71331:70450)	Y(68505:67453)	Y(67832:66780)	Y(68510:67458)	Y(68362:67316)	Y(67851:66805)	Y(87033:88022)	Y(58909:59946)	Y(62195:63202)	Y(81047:80046)	Y(81449:80448)	Y(81218:80217)	Y(81189:80188)	Y(81002:80001)	Y(70409:71269)	Y(84583:83792)	Y(82985:83863)	Y(68847:67801)	Y(68393:67347)	Y(67512:66463)	Y(90292:89252)	Y(73628:74614)	Y(72007:71126)	Y(67804:66755)	Y(76835:75861)	Y(72415:71534)	Y(71843:70962)	Y(71910:71029)	Y(72987:72106)	Y(72803:71922)	Y(88648:89637)	Y(71561:70680)	Y(78272:79129)	Y(75758:76615)	Y(78574:79431)
vp80	Y(72196:70553)	N	Y(49271:47358)	Y(57843:56125)	N	Y(60271:58589)	Y(59579:57897)	Y(67297:65615)	Y(59909:58227)	Y(60181:58499)	Y(60323:58641)	Y(60036:58354)	Y(58301:56586)	Y(53441:51726)	Y(84553:86370)	Y(82437:84518)	Y(81724:83802)	Y(82442:84526)	Y(82274:84358)	Y(82563:84641)	Y(70214:68568)	Y(46373:44145)	Y(48506:46593)	Y(94671:96401)	Y(95067:96797)	Y(94841:96571)	Y(94807:96537)	Y(94618:96348)	N	Y(98892:101321)	N	Y(82742:84826)	Y(82305:84386)	Y(81402:83486)	Y(103048:105921)	Y(59512:57797)	Y(85229:87046)	Y(82495:84573)	Y(89820:92120)	Y(85665:87482)	Y(85070:86887)	Y(85138:86955)	Y(86218:88035)	Y(86028:87845)	Y(71842:70196)	Y(84783:86600)	N	N	N
xe	Y(14508:14924)	N	N	Y	N	Y	Y	Y	Y	Y	Y	Y	Y	Y	N	N	N	N	N	N	Y(14761:15144)	N	N	N	N	N	N	N	N	N	N	N	N	N	N	Y	N	N	N	N	N	N	N	N	Y(14783:15166)	N	N	N	N
XE-2	Y(66348:66872)	N	N	N	N	N	N	N	N	N	N	N	N	N	N	N	N	N	N	N	Y(64366:64890)	N	N	N	N	N	N	N	N	N	N	N	N	N	N	N	N	N	N	N	N	N	N	N	Y(65994:66518)	N	N	N	N
[truncated: 248 more columns]
