# Supplementary material for: Protein-Gene Orthology in Baculoviridae: An Exhaustive Analysis to Redefine the Ancestrally Common Coding Sequences
Source: Viruses. 2023 Apr 29;15(5):1091. doi: 10.3390/v15051091 (PMC10223672; doi:10.3390/v15051091)
Supplement: Supplementary file 1 [file viruses-15-01091-s001.zip › Table S5.xlsx]

## Sheet: salida
Genome	Unique Gene1	Unique Gene2	Unique Gene3	Unique Gene4	Unique Gene5	Unique Gene6	Unique Gene7	Unique Gene8	Unique Gene9	Unique Gene10	Unique Gene11	Unique Gene12	Unique Gene13	Unique Gene14	Unique Gene15	Unique Gene16	Unique Gene17	Unique Gene18	Unique Gene19	Unique Gene20	Unique Gene21	Unique Gene22	Unique Gene23	Unique Gene24	Unique Gene25	Unique Gene26	Unique Gene27	Unique Gene28	Unique Gene29	Unique Gene30	Unique Gene31	Unique Gene32	Unique Gene33	Unique Gene34	Unique Gene35	Unique Gene36	Unique Gene37	Unique Gene38	Unique Gene39	Unique Gene40	Unique Gene41	Unique Gene42	Unique Gene43	Unique Gene44	Unique Gene45	Unique Gene46	Unique Gene47	Unique Gene48	Unique Gene49
MK089451.1	hypothetical protein (29964..30410)	hypothetical protein (complement(52955..53191))	hypothetical protein (complement(135155..135532))
LC375542.1	hypothetical protein (17105..17848)
NC_008293.1	hypothetical protein (6705..7784)	hypothetical protein (complement(27544..27741))	hypothetical protein (complement(30053..30427))	hypothetical protein (complement(43998..44198))	hypothetical protein (50210..50404)	hypothetical protein (complement(50401..50688))	Ld132-like protein (complement(53016..53573))	ac70-like protein (55427..56416)	hypothetical protein (71314..71481)	Hz102-like protein (complement(103312..103806))	Ld144-like protein (complement(104643..105281))
NC_003349.1	ORF46 (complement(39876..40103))	ORF86 (complement(75450..75947))	ORF102 (94347..94703)
NC_007767.1	ORF7 peptide (7249..7434)	ORF18 peptide (complement(17736..18506))	ORF22 peptide (22954..23529)	ORF99 peptide (complement(91790..91981))	ORF100 peptide (complement(91837..91992))
NC_011615.1	hypothetical protein (5967..6533)	hypothetical protein (complement(11719..12678))	hypothetical protein (16798..17397)	hypothetical protein (23525..23839)	hypothetical protein (complement(23960..24595))	hypothetical protein (complement(39965..40306))	hypothetical protein (complement(53687..54301))	hypothetical protein (55846..56316)	hypothetical protein (87255..87770)	hypothetical protein (109771..110232)	hypothetical protein (complement(129595..130059))	hypothetical protein (complement(133594..134643))
NC_008168.1	hypothetical protein (3195..3449)	hypothetical protein (52398..52856)	hypothetical protein (complement(53951..54211))	hypothetical protein (complement(98491..98661))	hypothetical protein (complement(99958..100137))
MN481987.1	hypothetical protein (46..150)	lef11 (complement(9557..9727))	hypothetical protein (complement(13060..13176))	hypothetical protein (33177..33365)	hypothetical protein (complement(34565..34687))	hypothetical protein (complement(35269..35499))	hypothetical protein (complement(35752..35982))	hypothetical protein (36091..36372)	hypothetical protein (complement(38430..38525))	hypothetical protein (41977..42195)	hypothetical protein (42793..42948)	hypothetical protein (complement(64601..64948))	hypothetical protein (complement(72352..72480))	hypothetical protein (79315..79743)	hypothetical protein (83268..83363)	hypothetical protein (83847..83939)	hypothetical protein (complement(92447..92623))	hypothetical protein (complement(93902..94051))	hypothetical protein (complement(94048..94170))	hypothetical protein (complement(94241..94357))	hypothetical protein (96530..96631)	hypothetical protein (112300..112623)	64.2 kDa inhibitor of apoptosis/RING-finger profile (114295..114930)	hypothetical protein (complement(131708..131839))	hypothetical protein (131907..132026)	hypothetical protein (complement(132666..132755))	hypothetical protein (134706..134999)	hypothetical protein (complement(140141..140269))
NC_001875.2	protein tyrosine phosphatase 1 (complement(6129..6791))	hypothetical protein (23373..23543)	hypothetical protein (53398..53580)	inhibitor of apoptosis protein 4 (complement(89341..89697))	hypothetical protein (115009..115761)	p8.9 (complement(127947..128174))
MN689116.1	hypothetical protein (complement(41266..41499))	hypothetical protein (61171..61872)
NC_043529.1	oxoc9 (complement(8952..9563))	oxoc27 (26322..26786)
MK033573.1	hypothetical protein (15790..16104)	hypothetical protein (49490..50263)	hypothetical protein (59824..60282)	hypothetical protein (complement(78520..79731))	hypothetical protein (complement(113391..113588))
NC_002331.1	ORF6 (complement(3577..3750))	ORF8 (4303..4563)	ORF9 (complement(4570..6024))	ORF28 (25465..26436)	ORF41 (complement(33095..33322))	ORF48 (38957..41476)	ORF60 (complement(51001..52455))	ORF63 (complement(55246..55476))	ORF64 (complement(55616..57685))	ORF65 (complement(57740..59182))	ORF69 (62520..63377)	ORF87 (81934..82428)	ORF104 (complement(97820..97987))	ORF113 (complement(105163..106284))	ORF153 (complement(152873..153025))	ORF156 (157147..157344)	ORF163 (complement(162881..166249))	ORF173 (complement(173732..173935))
KR815461.1	protein tyrosine phosphatase 1 (127550..128074)
GU111736.1	unknown (complement(741..1172))	unknown (2588..2857)	unknown (complement(19330..19485))	unknown (complement(46477..46662))	unknown (55517..56002)	unknown (complement(72794..73945))	unknown (complement(101981..102157))	unknown (complement(103524..103736))
MG958660.1	hypothetical protein (complement(46412..46639))	hypothetical protein (complement(103357..103890))	hypothetical protein (complement(106726..107649))	hypothetical protein (111207..111407)
KJ004000.1	ORF46 (complement(39894..40121))	ORF86 (complement(75468..75965))	ORF102 (94365..94721)
NC_029997.2	hypothetical protein (18147..18410)	hypothetical protein (21087..21818)	hypothetical protein (complement(29464..29814))	hypothetical protein (33473..33631)	hypothetical protein (complement(33734..33973))	hypothetical protein (52976..53128)	hypothetical protein (104361..104510)
KU669293.1	hypothetical protein (complement(41338..41571))	hypothetical protein (61189..61935)
KX618634.1	hypothetical protein (30894..31160)	hypothetical protein (31081..31335)	hypothetical protein (complement(136678..137061))	hypothetical protein (complement(137824..138165))
KR815456.1	protein tyrosine phosphatase 1 (127228..127752)
JX193905.1	DekiORF34 (complement(26176..26349))	DekiORF43 (32935..33087)	DekiORF50 (complement(38328..38702))	DekiORF70 (61349..61528)	DekiORF86 (<73847..73856)	DekiORF120 (105755..>105757)	DekiORF120 (<105858..105919)	DekiORF4 (complement(137235..137540))	DekiORF6 (139084..>139168)
MK033570.1	hypothetical protein (15820..16134)	hypothetical protein (49806..50579)	hypothetical protein (60138..60635)	hypothetical protein (complement(78841..80052))	hypothetical protein (complement(113927..114124))
NC_003529.1	hypothetical protein (5704..6312)	hypothetical protein (complement(11516..12475))	hypothetical protein (17121..17720)	hypothetical protein (26164..26496)	hypothetical protein (complement(26606..27250))	hypothetical protein (40877..41329)	hypothetical protein (complement(42449..42790))	hypothetical protein (complement(55258..55935))	hypothetical protein (complement(57418..58032))	hypothetical protein (59552..60028)	hypothetical protein (88506..89012)	hypothetical protein (110959..111429)	hypothetical protein (122506..122733)	hypothetical protein (complement(130408..130866))	hypothetical protein (complement(134425..135474))
JX560542.1	hypothetical protein (complement(41414..41644))	hypothetical protein (complement(72978..73580))
KX859080.1	hypothetical protein (complement(744..1082))	hypothetical protein (4405..4644)	hypothetical protein (20265..21194)	hypothetical protein (48706..49212)	hypothetical protein (complement(50431..50661))	hypothetical protein (complement(65081..66181))
NC_025257.1	hypothetical protein (complement(744..1082))	hypothetical protein (4404..4643)	hypothetical protein (20368..21297)	P10 (complement(36966..37331))	hypothetical protein (48785..49291)	hypothetical protein (complement(50509..50739))	hypothetical protein (complement(65159..66259))
KU738901.1	ORF45 (complement(39409..39636))	ORF85 (complement(75023..75520))	ORF101 (93904..94260)
NC_038371.1	Clas6 (3446..3613)	Clas24 (21254..22567)	Clas64 (51846..52361)	Clas67 (complement(53631..53873))	Clas106 (complement(91625..91810))	Clas113 (complement(96613..96972))	Clas119 (complement(102186..102389))
NC_003094.2	hypothetical protein (complement(19601..19765))	hypothetical protein (complement(39628..39855))	hypothetical protein (complement(74939..75436))	hypothetical protein (94516..94872)
NC_040606.1	hypothetical protein (complement(3612..3812))	hypothetical protein (6028..6255)	hypothetical protein (6725..7594)	hypothetical protein (12782..12958)	hypothetical protein (complement(40248..40472))	hypothetical protein (61423..61581)	hypothetical protein (61668..61988)	hypothetical protein (76404..76604)	hypothetical protein (76886..77050)	hypothetical protein (complement(97473..97910))	hypothetical protein (100646..101761)	hypothetical protein (complement(129364..130041))
LC375537.1	hypothetical protein (16948..17691)
MK033568.1	hypothetical protein (15819..16133)	hypothetical protein (49780..50553)	hypothetical protein (60112..60570)	hypothetical protein (complement(78785..79996))	hypothetical protein (complement(113871..114068))
LC375538.1	hypothetical protein (16771..17514)
KM986882.1	ORF-18 (16384..16971)	ORF-36 (30858..31274)	ORF-45 (36936..37157)	ORF-89 (84198..84623)	ORF-92 (complement(87051..87548))	ORF-94 (complement(88196..88648))	ORF-105 (96686..97012)	ORF-131 (complement(119819..120283))
AF539999.1	hypothetical protein (5716..6324)	hypothetical protein (complement(11524..12483))	hypothetical protein (17129..17728)	hypothetical protein (24878..25198)	hypothetical protein (complement(25306..25947))	hypothetical protein (39574..40026)	hypothetical protein (complement(41145..41486))	hypothetical protein (complement(53866..54537))	hypothetical protein (complement(56017..56631))	hypothetical protein (57071..57556)	hypothetical protein (58151..58627)	hypothetical protein (87108..87614)	hypothetical protein (109563..110033)	hypothetical protein (121111..121338)	hypothetical protein (complement(128941..129399))	hypothetical protein (complement(132958..134007))
NC_026922.1	hypothetical protein (22873..23439)	hypothetical protein (38794..38952)	hypothetical protein (42303..43040)	hypothetical protein (complement(42733..43101))	hypothetical protein (101142..101378)	p26b (101467..102660)	hypothetical protein (complement(106984..107304))	hypothetical protein (complement(110000..110245))	hypothetical protein (115903..116202)	hypothetical protein (118017..118229)	hypothetical protein (complement(123675..124193))	transposase mut (complement(138508..139356))	hypothetical protein (complement(139328..140035))	p26 (complement(140140..140544))	hypothetical protein (complement(146774..146983))	hypothetical protein (complement(147230..147430))	hypothetical protein (153371..153856)	hypothetical protein (153886..154245)	hypothetical protein (157678..157878)
NC_003083.1	hypothetical protein (complement(21386..21652))	hypothetical protein (complement(95810..96253))	hypothetical protein (115003..115248)
MN696168.1	ORF5 (2729..2971)	ORF79 (63014..63484)	ORF82b (complement(64764..65021))	ORF99 (complement(81501..82685))	ORF136 (complement(118321..118542))
KM217573.1	ORF5 (2731..2973)	ORF66 ptp-2 (53859..54098)	ORF79 (62716..63186)	ORF82a (complement(64466..64723))	ORF99 (complement(81027..82211))	ORF136 (complement(117838..118059))
NC_002169.1	ORF33 (complement(34039..34377))	ORF51 (48581..49009)	ORF68 (64928..65413)	ORF84 (82519..83154)	ORF86 (83527..83703)
MN395659.1	maco-A 5 (5720..6328)	maco-A 10 (complement(11516..12475))	maco-A 18 (17180..17779)	maco-A 29 (26893..27213)	maco-A 30 (complement(27323..27964))	maco-A 43 (41596..42048)	maco-A 46 (complement(43176..43517))	maco-A 61 (complement(56149..56658))	maco-A 65 (complement(58138..58752))	maco-A 67 (59192..59677)	maco-A 69 (60272..60748)	maco-A 97 (91108..91614)	maco-A 120 (113555..114025)	maco-A 135 (125096..125323)	maco-A 142 (complement(132920..133378))	maco-A 146 (complement(136939..137985))
NC_012639.1	hypothetical protein (complement(17938..18126))	hypothetical protein (26144..26374)	hypothetical protein (34641..34823)	hypothetical protein (complement(76890..77327))	hypothetical protein (complement(101398..102156))	hypothetical protein (complement(116557..116886))
KU666536.1	hypothetical protein (15785..16099)	hypothetical protein (49631..50404)	hypothetical protein (59955..60413)	hypothetical protein (complement(78648..79859))	hypothetical protein (complement(113513..113710))
KU666537.1	PlxyGVORF9 protein (4972..5253)	PlxyGVORF82 protein (complement(65147..66169))	PlxyGVORF114 protein (complement(95924..96253))
KJ701031.1	hypothetical protein (complement(39482..39709))	hypothetical protein (complement(75377..75874))	hypothetical protein (93976..94332)
KU862282.1	Orf-24 protein (30747..31115)	Orf-25 protein (complement(31187..31390))	Orf-26 protein (complement(31281..31538))	Orf-84 protein (88405..88578)	Orf-130 protein (complement(138025..138414))	Orf-132 protein (complement(139178..139519))	Orf-134 protein (140101..140487)	Orf-145 protein (148623..148937)
NC_055502.1	ORF10 (complement(13306..13683))	ORF22 (complement(25312..25734))	ORF33 (complement(36407..36742))	ORF53 (52590..53039)	ORF108 (110957..111160)
KM217576.1	ORF5 (2729..2971)	ORF79 (63584..64054)	ORF82b (complement(65334..65591))	ORF99 (complement(82072..83256))	ORF136 (complement(118888..119109))
MN696167.1	ORF5 (2732..2974)	ORF79 (63015..63485)	ORF82b (complement(64765..65022))	ORF99 (complement(81502..82686))	ORF136 (complement(118321..118542))
MW645368.1	Hypothetical protein (6590..7981)	Hypothetical protein (complement(68085..68528))	Hypothetical protein (73132..73302)	Hypothetical protein (complement(120608..120946))	Hypothetical protein (121016..121204)	Hypothetical protein (121207..121872)	Hypothetical protein (121869..122531)	Hypothetical protein (complement(125819..126970))	Hypothetical protein (132763..133095)
NC_021923.1	diguanylate kinase signaling-like protein (5524..6504)	hypothetical protein (complement(7688..8362))	serpin (18920..20167)	hypothetical protein (31032..31580)	hypothetical protein (complement(52219..52614))	ring finger protein (complement(81330..81782))	hypothetical protein (81756..81935)	hypothetical protein (complement(109682..109912))	HESP111 (111522..111869)	HESP112 (complement(111971..112498))
LC375543.1	hypothetical protein (17144..17887)
KX859083.1	hypothetical protein (complement(744..1082))	hypothetical protein (4405..4644)	hypothetical protein (20318..21247)	hypothetical protein (48738..49244)	hypothetical protein (complement(50466..50696))	hypothetical protein (complement(65122..66228))
NC_040621.1	ORF4 protein (complement(3043..5250))	ORF5 protein (5990..6406)	ORF19 protein (complement(17165..17755))	ORF33 protein (complement(27474..27890))	ORF36 protein (complement(28951..29322))	ORF43 protein (complement(34748..35092))	ORF48 protein (complement(38369..38623))	ORF53 protein (40057..40263)	ORF56 protein (42143..43081)	ORF60 protein (complement(45758..45997))	ORF76 protein (62523..63194)	ORF94 protein (complement(79190..79543))	ORF97 protein (complement(80878..82017))	ORF98 protein (82209..82766)	ORF102 protein (84363..85289)	ORF104 protein (86880..87932)	ORF124 protein (108496..108963)
KR815458.1	protein tyrosine phosphatase 1 (126562..127086)
NC_023442.1	ORF-15 (complement(14737..15153))	ORF-43 (37087..37308)	ORF-89 (complement(87211..87708))	ORF-102 (96845..97171)
OK091173.1	hypothetical protein (8178..8567)	hypothetical protein (complement(39616..40056))	hypothetical protein (41619..42242)	hypothetical protein (83866..84507)	hypothetical protein (107196..107354)
NC_008035.3	hypothetical protein (complement(109657..110400))
KM596835.1	hypothetical protein (complement(22409..22657))	hypothetical protein (complement(38696..38923))	hypothetical protein (51396..51557)	hypothetical protein (complement(74271..74768))	hypothetical protein (93171..93527)	hypothetical protein (107604..107792)
KR815471.1	protein tyrosine phosphatase 1 (127386..127910)
DQ317692.1	unknown (complement(907..1953))	unknown (complement(2094..2273))	unknown (6636..6809)	unknown (complement(18913..19074))	unknown (complement(27374..27559))	unknown (28292..29335)	unknown (30632..30811)	unknown (complement(39534..39722))	unknown (42459..42617)	unknown (48578..49933)	unknown (67600..67755)	unknown (74927..75151)
HM595733.1	hypothetical protein (21915..22556)	hypothetical protein (46183..46614)	hypothetical protein (62859..63314)	hypothetical protein (100570..100773)
NC_004117.1	hypothetical protein (5913..6503)	hypothetical protein (complement(11690..12649))	hypothetical protein (17186..17476)	hypothetical protein (23947..24261)	hypothetical protein (complement(24391..25026))	hypothetical protein (38788..39228)	hypothetical protein (complement(40338..40679))	hypothetical protein (51665..53107)	hypothetical protein (53162..53656)	hypothetical protein (complement(59513..60127))	hypothetical protein (61672..62142)	hypothetical protein (90852..91376)	hypothetical protein (113391..113852)	hypothetical protein (complement(133866..134330))	hypothetical protein (complement(137865..138914))
NC_003102.1	hypothetical protein (complement(6227..6511))	hypothetical protein (complement(9674..9829))	hypothetical protein (complement(46199..46426))	hypothetical protein (complement(51886..52053))	hypothetical protein (complement(52622..52825))	hypothetical protein (complement(55717..55950))	hypothetical protein (complement(101236..101775))	hypothetical protein (complement(104792..105595))	hypothetical protein (109007..109165)	hypothetical protein (112963..113280)	hypothetical protein (123737..125107)	hypothetical protein (complement(137436..137618))	hypothetical protein (complement(138975..139160))
MW173388.1	hypothetical protein (complement(76304..76741))	hypothetical protein (complement(100810..101313))	hypothetical protein (complement(115952..116281))
SPORGV2022.1	GEN32.1 B-lcl|SPORGV2022.1 [protein_id=SlGV129] (EN32.1 B-lcl|SPORGV2022.1 [protein_id=SlGV129])	GEN59.1 B-lcl|SPORGV2022.1 [protein_id=SlGV25] (EN59.1 B-lcl|SPORGV2022.1 [protein_id=SlGV25])	GEN85.1 B-lcl|SPORGV2022.1 [protein_id=uniq] (EN85.1 B-lcl|SPORGV2022.1 [protein_id=uniq])	GEN103.1 B-lcl|SPORGV2022.1 [protein_id=p6.9] (EN103.1 B-lcl|SPORGV2022.1 [protein_id=p6.9])	GEN116.1 B-lcl|SPORGV2022.1 [protein_id=SlGV89] (EN116.1 B-lcl|SPORGV2022.1 [protein_id=SlGV89])
NC_022646.1	ORF1629 (complement(744..1157))	hypothetical protein (2541..2807)	hypothetical protein (complement(29881..30063))	hypothetical protein (36354..36512)	hypothetical protein (49961..50404)	hypothetical protein (complement(66973..68031))	hypothetical protein (complement(72717..73454))	hypothetical protein (complement(95277..95465))	hypothetical protein (complement(96796..97005))
NC_010240.1	hypothetical protein (4299..4559)	immediate-early transcriptional regulatory protein-1 (complement(4566..6023))	hypothetical protein (24381..25364)	hypothetical protein (complement(50427..50954))	hypothetical protein (complement(52581..54635))	hypothetical protein (complement(54682..56124))	hypothetical protein (79022..79516)	hypothetical protein (complement(80816..81028))	hypothetical protein (98624..98818)	hypothetical protein (102346..102537)	hypothetical protein (complement(102490..103608))	hypothetical protein (complement(164745..164948))
KM667940.1	Ac-hcf-1 (60244..61116)	AcOrf-84 (71299..71865)
KJ871680.1	Orf5 (5963..6529)	Orf9 (complement(11715..12674))	Orf16 (16073..16672)	Orf23 (22800..23114)	Orf24 (complement(23235..23870))	Orf40 (complement(39239..39580))	Orf56 (complement(52961..53575))	Orf60 (55120..55590)	Orf89 (86738..87253)	Orf112 (109253..109714)	Orf134 (complement(129289..129753))	Orf138 (complement(133288..134337))
NC_011616.1	hypothetical protein (complement(13083..13457))	hypothetical protein (complement(23616..24038))	hypothetical protein (30127..30297)	hypothetical protein (30599..30838)	hypothetical protein (complement(35813..36148))	hypothetical protein (36602..36802)	hypothetical protein (52102..52545)	hypothetical protein (110801..111004)
NC_002593.1	PxORF82 peptide (complement(65211..66233))	PxORF114 peptide (complement(95982..96311))
MG569706.1	hypothetical protein (18280..18606)	hypothetical protein (complement(39722..39949))	hypothetical protein (complement(74187..74684))	ORF101 (93240..93596)
KC960018.1	hypothetical protein (123198..123899)
KU738904.1	ORF45 (complement(39410..39637))	ORF85 (complement(75025..75522))	ORF101 (93906..94262)
KU752557.1	ie1 (complement(4496..5920))	hypothetical protein (37663..41304)	hypothetical protein (complement(50691..50903))	hypothetical protein (complement(52441..54516))	hypothetical protein (complement(54582..56108))	hypothetical protein (82064..82558)	hypothetical protein (complement(83861..84073))	p6.3 (90980..91153)	hypothetical protein (complement(170383..170586))
KU738896.1	ORF45 (complement(39446..39685))	ORF85 (complement(75030..75527))	ORF101 (93927..94283)
KP747440.1	hypothetical protein (complement(20429..21181))	hypothetical protein (complement(21264..21749))	hypothetical protein (21801..22142)	hypothetical protein (42482..42676)	hypothetical protein (complement(42681..42887))	hypothetical protein (43048..43542)	inhibitor of apoptosis protein 4 (46493..46675)	hypothetical protein (complement(46836..46967))	hypothetical protein (46966..47127)	ubiquitin like protein (complement(85267..85800))	hypothetical protein (114477..114698)	protein tyrosine phosphatase 1 (132448..132981)
KU529791.1	PxGV-Corf80 protein (complement(65172..66194))	PxGV-Corf112 protein (complement(95963..96292))
KM217577.1	ORF5 (2729..2971)	ORF79 (63175..63645)	ORF82b (complement(64925..65182))	ORF99 (complement(81669..82853))	ORF136 (complement(118477..118698))
NC_010276.1	hypothetical protein (complement(31385..31858))	hypothetical protein (45130..45399)	hypothetical protein (64240..64482)	hypothetical protein (complement(87552..87962))	hypothetical protein (complement(112093..112998))	hypothetical protein (133696..134169)
MK033571.1	hypothetical protein (15816..16130)	hypothetical protein (49751..50524)	hypothetical protein (60084..60542)	hypothetical protein (complement(78793..80004))	hypothetical protein (complement(113667..113864))
NC_011345.1	agip5 (complement(5474..5710))	agip13 (complement(13119..14087))	agip28 (29435..30193)	agip40 (complement(40908..41240))	agip60 (58724..59182)	agip66 (64375..64542)	agip67 (64481..64633)	agip90 (88334..88969)	agip110 (complement(110729..110893))	agip131 (complement(129462..129872))	agip135 (complement(133801..134784))	agip157 (149913..150077)	agip159 (150077..150406)	agip162 (152464..152619)
KF695050.2	ORF-25 protein (30771..31217)	ORF-52 protein (complement(53673..53909))	ORF-148 protein (complement(139715..140098))
JX560540.1	hypothetical protein (complement(41820..42053))	hypothetical protein (complement(73212..73814))
MK033569.1	hypothetical protein (15821..16135)	hypothetical protein (49825..50598)	hypothetical protein (60157..60654)	hypothetical protein (complement(78863..80074))	hypothetical protein (complement(113949..114146))
MN689115.1	hypothetical protein (complement(41185..41418))	hypothetical protein (61088..61789)
OL686893.1	host range factor 1 protein (12186..12521)	HycuOrf-18 hypothetical protein (complement(18049..18819))
LC194889.1	hypothetical protein (16877..17620)
KP027546.2	orf-24 protein (30277..30543)	orf-25 protein (30464..30718)	orf-140 protein (complement(140238..140621))
HG425346.1	Unknown (Maco41) (complement(33645..33983))	Unknown (Maco68) (48187..48615)	Unknown (Ac145) (64565..65035)	Unknown (Se84) (82195..82830)	Unknown (Maco134) (102201..102404)
JX138237.2	Mabr_orf5 (5942..6508)	Mabr_orf10 (complement(11691..12650))	Mabr_orf24 (23812..24126)	Mabr_orf25 (complement(24256..24891))	Mabr_orf41 (complement(39963..40304))	Mabr_orf61 (55810..56280)	Mabr_orf89 (85123..85638)	Mabr_orf112 (107658..108119)	Mabr_orf135 (complement(129865..130104))	Mabr_orf139 (complement(133639..134688))
HG425349.2	Unknown (Maco41) (complement(33763..34101))	Unknown (Maco68) (48307..48735)	Unknown (Ac145) (64692..65162)	Unknown (Se84) (82342..82977)	Unknown (Maco134) (102310..102513)
NC_055455.1	hypothetical protein (complement(29367..29702))	hypothetical protein (43212..43787)	hypothetical protein (44446..44862)	hypothetical protein (60490..60948)	hypothetical protein (complement(88440..88661))	hypothetical protein (97243..97404)	hypothetical protein (99037..99240)
NC_004690.1	hypothetical protein (15296..15487)	baculovirus repeated ORF (30616..30957)	inhibitor of apoptosis protein 4 (33262..33675)	hypothetical protein (36443..36673)	hypothetical protein (78605..78766)	hypothetical protein (82024..82194)	hypothetical protein (83967..84122)	hypothetical protein (98556..100286)
MH923363.1	capsid protein (complement(744..1250))	hypothetical protein (complement(10836..11612))	hypothetical protein (complement(13922..14593))	hypothetical protein (15174..16145)	hypothetical protein (complement(16187..16519))	hypothetical protein (complement(44391..44549))	hypothetical protein (44569..44730)	hypothetical protein (complement(45051..45638))	p6.9 (56589..56771)	AgseGVORF88-like protein (complement(68152..69300))	hypothetical protein (complement(97887..98729))	hypothetical protein (complement(106258..106695))	AgseGVORF125-like protein (complement(108724..108879))	hypothetical protein (complement(111522..111866))	hypothetical protein (114447..114746)
MK033566.1	hypothetical protein (15765..16079)	hypothetical protein (49607..50380)	hypothetical protein (59911..60369)	hypothetical protein (complement(78548..79759))	hypothetical protein (complement(113422..113619))
KJ186100.1	hypothetical protein (22732..22974)
MK746083.1	hypothetical protein (5848..7107)	hypothetical protein (complement(38296..38523))	hypothetical protein (complement(70063..70641))	hypothetical protein (complement(109197..109847))
MH124167.1	ORF4 (complement(3411..3974))	ORF9 (complement(11061..11327))	ORF25 (complement(29570..29803))	ORF47 (complement(50082..50309))	ORF56 (56198..56629)	ORF61 (complement(61075..61284))	ORF81 (85274..85723)	ORF90 (complement(95760..96062))	ORF112 (complement(115694..116209))
NC_024625.1	hypothetical protein (6896..7888)	orf10-like protein (complement(13375..14316))	hypothetical protein (complement(24926..25528))	hypothetical protein (complement(26126..26809))	hypothetical protein (41494..41667)	ring finger (complement(84247..84762))	hypothetical protein (complement(86078..86779))	orf109-like protein (complement(108578..109255))	hypothetical protein (complement(114722..115288))	hypothetical protein (123742..123957)	orf061-like protein (124052..125497)	orf146-like protein (complement(128774..129739))
KM217575.1	ORF5 (2729..2971)	ORF79 (62842..63312)	ORF82b (complement(64592..64849))	ORF99 (complement(81329..82513))	ORF136 (complement(118148..118369))
NC_001623.1	actin rearrangement inducing factor (complement(16013..16222))	AcOrf-70 peptide (60110..60982)	AcOrf-84 peptide (71165..71731)	AcOrf-107 peptide (94059..94391)
MH797002.1	hypothetical protein (17536..18279)	p94-like protein (21383..22873)
KU529792.1	PxGV-Korf80 protein (complement(65200..66222))	PxGV-Korf112 protein (complement(95987..96316))
MK503924.1	hypothetical protein (47690..48121)	hypothetical protein (101730..101933)
KJ701032.1	hypothetical protein (complement(39746..39973))	baculovirus repeated ORF b (51851..52156)	hypothetical protein (complement(76454..76954))	hypothetical protein (95495..95851)
MN689113.1	transmembrane domain protein (5208..5699)	hypothetical protein (complement(41256..41489))	hypothetical protein (61139..61840)
NC_029304.2	hypothetical protein (3071..3346)	hypothetical protein (8115..8324)	hypothetical protein (complement(15143..15415))	hypothetical protein (54399..54785)	hypothetical protein (complement(56109..56378))	hypothetical protein (71522..71731)	hypothetical protein (complement(72157..72969))	hypothetical protein (complement(105859..106065))	hypothetical protein (complement(107468..107662))
KR815470.1	protein tyrosine phosphatase 1 (127001..127525)
MN696166.1	ORF5 (2728..2970)	ORF79 (63001..63471)	ORF82b (complement(64751..65008))	ORF99 (complement(81493..82677))	ORF136 (complement(118287..118508))
KU529794.1	PxGV-Torf80 protein (complement(65173..66195))	PxGV-Torf112 protein (complement(95961..96290))
MK503925.1	hypothetical protein (21916..22563)	hypothetical protein (46190..46621)	hypothetical protein (100272..100475)
KX859082.1	hypothetical protein (complement(744..1082))	hypothetical protein (4405..4644)	hypothetical protein (20370..21299)	hypothetical protein (48775..49281)	hypothetical protein (complement(50500..50730))	hypothetical protein (complement(65147..66247))
MN320360.1	maco-A 5 (5692..6300)	maco-A 10 (complement(11489..12448))	maco-A 18 (17160..17759)	maco-A 29 (26053..26373)	maco-A 30 (complement(26483..27124))	maco-A 94/2 32 (28068..29510)	maco-A 94/2 33 (29565..31625)	maco-A 94/2 34 (31769..31999)	maco-A 43 (48150..48602)	maco-A 46 (complement(49730..50071))	maco-A 65 (complement(64713..65327))	maco-A 67 (65767..66252)	maco-A 69 (66847..67323)	maco-A 97 (97690..98196)	maco-A 120 (120134..120604)	maco-A 135 (131676..131903)	maco-A 142 (complement(139503..139961))	maco-A 146 (complement(143520..144569))
NC_004062.1	hypothetical protein (2922..3197)	hypothetical protein (15754..16068)	hypothetical protein (49702..50475)	hypothetical protein (60034..60492)	hypothetical protein (complement(78733..79944))	hypothetical protein (complement(113813..114010))
EU258200.1	unknown (21968..22585)	unknown (46249..46680)	unknown (62401..62856)	unknown (100021..100224)
MN696170.1	ORF5 (2728..2970)	ORF79 (63009..63479)	ORF82b (complement(64759..65016))	ORF99 (complement(81501..82685))	ORF136 (complement(118310..118531))
JX535500.1	hypothetical protein (complement(41651..41884))	hypothetical protein (complement(73041..73643))
KM217574.1	ORF5 (2736..2978)	ORF51 (42471..43619)	ORF79 (60023..60493)	ORF82a (complement(61773..62030))	ORF99 (complement(78490..79674))	ORF136 (complement(115433..115654))
NC_027923.1	hypothetical protein (complement(3629..4042))	hypothetical protein (12561..12713)	hypothetical protein (17380..17838)	hypothetical protein (17901..18380)	hypothetical protein (32780..32938)	hypothetical protein (40545..40751)	hypothetical protein (41800..42030)	hypothetical protein (43613..43858)	hypothetical protein (complement(43708..43965))	hypothetical protein (81240..81410)	hypothetical protein (complement(90810..91187))	hypothetical protein (91056..91829)	hypothetical protein (complement(95671..96060))	hypothetical protein (98277..98459)	hypothetical protein (complement(103643..104098))	hypothetical protein (complement(104260..104409))	hypothetical protein (complement(127192..127401))	38.7K (128429..129580)	hypothetical protein (complement(129678..130292))
MZ394738.1	hypothetical protein EONV_gp112 (complement(35359..35817))	hypothetical protein EONV_gp110 (complement(36550..37251))	hypothetical protein (complement(64159..64443))	hypothetical protein EONV_gp070 (73653..74066)	hypothetical protein EONV_gp037 (107142..107357)
KP658210.1	ClanGV_gp005 (3068..3343)	PiraGV ORF7 (complement(4610..4915))	ORF9 (complement(5799..6056))	ORF10 (6076..6234)	ORF55 (45246..45404)	ORF56 (45446..45898)	PiraGV ORF64 (55166..55552)	hypothetical protein (complement(56882..57151))	ORF86 (72304..72555)	PsunGV_gp117 (complement(72644..73195))	ChocGV_gp078 (complement(73042..73752))	ORF93 (76901..77122)	ORF102 (complement(84685..84891))	ORF115 (96452..96745)	ORF116 (96772..96975)	ORF121 (103162..103356)	ORF124 (complement(106672..106878))	ORF127 (complement(108098..108253))	PiraGV ORF115 (complement(108280..108474))
NC_018875.1	hypothetical protein (3809..4246)	hypothetical protein (complement(4256..4669))	hypothetical protein (6660..6905)	hypothetical protein (7110..7382)	hypothetical protein (complement(12632..12850))	hypothetical protein (15301..15531)	hypothetical protein (15947..16231)	hypothetical protein (16218..17486)	hypothetical protein (complement(19013..19606))	hypothetical protein (complement(39687..40607))	hypothetical protein (43254..47651)	hypothetical protein (complement(48250..48459))	hypothetical protein (66113..66571)	hypothetical protein (complement(67749..67952))	hypothetical protein (complement(78917..79177))	hypothetical protein (complement(101057..101545))	hypothetical protein (103236..103391)	hypothetical protein (complement(111763..112011))
KU669291.1	hypothetical protein (complement(41336..41569))	hypothetical protein (61178..61924)
MK264918.1	mucin-like protein (complement(3838..4446))	ORF29 (29851..30297)	ORF139 (complement(138963..139346))
MK033576.1	hypothetical protein (15787..16101)	hypothetical protein (49546..50319)	hypothetical protein (59874..60332)	hypothetical protein (complement(78571..79782))	hypothetical protein (complement(113464..113661))
NC_005038.1	ORF_5 (2434..2685)	ORF_52 (36745..36915)	ORF_66 (48052..48507)	ORF_83 (complement(64468..65535))	ORF_114 (complement(94905..95102))
NC_055500.1	orf5 (6776..7255)	orf14 (complement(13748..14536))	orf89 (82376..82639)	orf96 (86802..87095)	orf108 (complement(94435..94656))
NC_001973.1	mucin-like protein (complement(4501..7590))	LdOrf-29 peptide (30469..30909)	Ld-FP'' (complement(57955..58119))	LdOrf-133 peptide (complement(130799..130963))	LdOrf-142 peptide (complement(137720..138076))	LdOrf-144 peptide (complement(138840..139181))
MH170055.1	ORF006 (4073..4327)	ORF024 (19325..20143)	chtb-2b (65952..66431)	ORF078 (complement(67681..67962))	ORF093 (complement(79807..80013))	ORF102 (complement(89819..90409))	ORF103 (complement(90612..91208))	chtb-2c (131855..132343)	ORF143 (complement(134448..134651))
OL686894.1	HycuOrf-18 hypothetical protein (5889..6659)	host range factor 1 protein (complement(12187..12516))
MN696165.1	ORF5 (2729..2971)	ORF79 (63009..63479)	ORF82b (complement(64759..65016))	ORF99 (complement(81496..82680))	ORF136 (complement(118324..118545))
NC_005906.1	hypothetical protein (1680..1922)	hypothetical protein (complement(3049..3207))	hypothetical protein (complement(5279..6859))	hypothetical protein (10181..10345)	hypothetical protein (11194..11436)	hypothetical protein (complement(15584..15775))	hypothetical protein (complement(63835..64128))	hypothetical protein (complement(72085..72279))	hypothetical protein (72547..72783)	hypothetical protein (complement(78101..78361))
NC_021925.1	hypothetical protein (7043..7261)	hypothetical protein (20123..20743)	hypothetical protein (complement(24967..25161))	hypothetical protein (29678..30028)
KJ922128.1	ORF45 (complement(39448..39687))	ORF85 (complement(75022..75519))	ORF101 (93919..94275)
MK419955.1	hypothetical protein (8001..8186)	hypothetical protein (complement(11934..12101))	hypothetical protein (13466..13633)	hypothetical protein (complement(20793..20975))	hypothetical protein (26891..27487)	hypothetical protein (complement(37631..37966))	hypothetical protein (complement(50820..50990))	hypothetical protein (53567..53992)	hypothetical protein (57646..57846)	hypothetical protein (complement(57883..58080))	hypothetical protein (complement(65361..65843))	hypothetical protein (88621..88857)	hypothetical protein (complement(88887..89057))	hypothetical protein (89291..89974)	hypothetical protein (complement(90013..90243))	hypothetical protein (91031..91201)	hypothetical protein (complement(101933..102082))	hypothetical protein (complement(127795..127956))	hypothetical protein (128266..128439)	hypothetical protein (129821..129994)
NC_008586.1	hypothetical protein (complement(38762..38977))	hypothetical protein (complement(72045..72458))	Ecob96 (97442..97792)	hypothetical protein (109226..109837)	hypothetical protein (110659..111117)
MN233792.1	orf5 (5874..6059)	orf6 (6364..7122)	Bro-d (complement(67333..68775))	orf82 (complement(90608..91018))	orf110 (complement(117823..118368))	orf113 (complement(120059..120643))	orf115 (complement(121305..121853))	orf127 (complement(133028..133396))	Bro-h (complement(159155..159439))
NC_019945.1	hypothetical protein (35167..35757)	hcf-1 protein (58813..59691)	hypothetical protein (69959..70498)
LC375540.1	hypothetical protein (16876..17619)	hypothetical protein (39792..39854)
HG425348.1	Unknown (Maco41) (complement(34033..34371))	Unknown (Maco68) (48585..49013)	Unknown (Ac145) (64979..65449)	Unknown (Se84) (82628..83263)	Unknown (Maco134) (102637..102840)
MT040195.1	hypothetical protein (11143..11292)	hypothetical protein (12151..12303)	hypothetical protein (22090..22272)	NAD-glutamate dehydrogenase (22923..23495)	hypothetical protein (28147..28323)	hypothetical protein (complement(33514..33843))	hypothetical protein (complement(39092..39268))	hypothetical protein (41836..42015)	hypothetical protein (complement(42064..42219))	hypothetical protein (49161..49586)	hypothetical protein (complement(53091..53360))	hypothetical protein (53791..54003)	ac150-like protein (64973..65410)	hypothetical protein (complement(83484..83831))	hypothetical protein (84509..84808)	hypothetical protein (complement(106245..106514))
NC_005839.2	ORF7 (6648..6911)	ORF70 (complement(69502..69804))	ORF88 (complement(85195..86340))	ORF121 (complement(118909..119112))
KR815459.1	protein tyrosine phosphatase 1 (126793..127317)
MK411292.1	hypothetical protein (30478..30750)	hypothetical protein (complement(136903..137289))
MZ127289.1	hypothetical protein (6019..6597)	hypothetical protein (26658..28037)	hypothetical protein (33974..34108)	hypothetical protein (complement(34015..34152))	hypothetical protein (49555..49761)	hypothetical protein (52075..52323)	hypothetical protein (complement(52137..52379))	hypothetical protein (complement(58528..58893))	hypothetical protein (complement(65008..65328))	hypothetical protein (complement(68772..68954))	hypothetical protein (79976..80323)	hypothetical protein (complement(112420..112857))	hypothetical protein (complement(113588..114595))	C3HC4 type Zn finger protein (124946..125482)	hypothetical protein (143068..143388)
KY550224.1	hypothetical protein (complement(18791..19561))	hypothetical protein (23349..23924)
MN099286.1	ORF80 protein (complement(65188..66210))	ORF112 protein (complement(95982..96311))
NC_043530.1	hypothetical protein (complement(5132..5404))	hypothetical protein (6936..7703)	hypothetical protein (complement(12490..13446))	hypothetical protein (complement(36174..36863))	hypothetical protein (complement(37050..37301))	hypothetical protein (45173..45523)	hypothetical protein (complement(45624..46286))	hypothetical protein (complement(50962..51231))	hypothetical protein (57103..57618)	hypothetical protein (113025..113237)	hypothetical protein (complement(122241..122630))	hypothetical protein (complement(126181..127122))	hypothetical protein (127335..127799)
MG746625.1	hypothetical protein (21206..21841)	protein tyrosine phosphatase 1 (127207..127731)
KJ701033.1	hypothetical protein (complement(39565..39792))	hypothetical protein (complement(76267..76764))	hypothetical protein (95307..95663)
KU738900.1	ORF45 (complement(39407..39634))	ORF85 (complement(75023..75520))	ORF101 (93904..94260)
NC_002654.2	hypothetical protein (complement(39711..39938))	hypothetical protein (complement(75536..76033))	hypothetical protein (94562..94918)
NC_005905.1	hypothetical protein (896..1483)	hypothetical protein (2798..2968)	hypothetical protein (4512..4853)	hypothetical protein (complement(13364..13540))	hypothetical protein (complement(13557..13721))	hypothetical protein (complement(23274..23543))	hypothetical protein (27470..27643)	hypothetical protein (33256..33492)	hypothetical protein (71462..71644)	hypothetical protein (78104..78733)	hypothetical protein (84084..84758)
KX859084.1	hypothetical protein (complement(744..1082))	hypothetical protein (4405..4644)	hypothetical protein (20248..21177)	hypothetical protein (48620..49126)	hypothetical protein (complement(50348..50578))	hypothetical protein (complement(65004..66107))
NC_013797.1	PrGVORF2 (complement(741..1154))	PrGVORF64 (55020..55502)	PrGVORF83 (complement(72289..73440))	PrGVORF112 (complement(102091..102255))	PrGVORF115 (complement(103634..103846))
MT844067.1	Maph2 (complement(760..1233))	Maph5 (2635..2886)	Maph22 (complement(15471..15905))	Maph40 (complement(36523..37353))	Maph55 (complement(49579..50214))	Maph56 (50399..51241)	Maph57 (complement(51356..51862))	Maph69 (60794..61279)	Maph72 (complement(62486..62755))	Maph119 (complement(109167..109349))	Maph122 (complement(110769..110990))
NC_008520.2	pe38 like protein (complement(3799..4428))	protein tyrosine phosphatase 1 (127550..128074)
NC_008349.1	host cell factor-1 (62203..63075)	hypothetical protein (73078..73641)	hypothetical protein (87356..87580)
NC_023681.1	hypothetical protein (5956..6522)	hypothetical protein (complement(11692..12651))	hypothetical protein (23954..24268)	hypothetical protein (complement(24398..25033))	hypothetical protein (complement(40216..40557))	hypothetical protein (complement(53922..54536))	hypothetical protein (56081..56551)	hypothetical protein (85403..85918)	hypothetical protein (107930..108391)	hypothetical protein (complement(127917..128381))	hypothetical protein (128410..128628)	hypothetical protein (complement(131916..132965))	hypothetical protein (147792..148058)
MW306663.1	hypothetical protein (complement(741..1154))	ORF53 (complement(46411..46800))	hypothetical protein (complement(46829..47356))	hypothetical protein (55614..56099)	ORF83 (complement(72838..73989))	hypothetical protein (93053..93154)	hypothetical protein (complement(102633..102809))	ORF115 (complement(104176..104388))
KU669294.1	hypothetical protein (complement(41322..41555))	hypothetical protein (61218..61919)
NC_026268.1	hypothetical protein (complement(41395..41628))	hypothetical protein (61291..62037)
JX968491.1	hypothetical protein (complement(741..1154))	ORF64 (55073..55555)	hypothetical protein (complement(72358..73509))	ORF112 (complement(102160..102336))	hypothetical protein (complement(103703..103915))
NC_031761.1	E3 ubiquitin-protein ligase RNF12-like protein (111509..111928)	protein tyrosine phosphatase 1 (127925..128449)
KF891883.1	hypothetical protein (47705..48136)	hypothetical protein (64070..64525)	hypothetical protein (101678..101881)
KX859079.1	hypothetical protein (complement(744..1082))	hypothetical protein (4405..4644)	hypothetical protein (20324..21250)	hypothetical protein (48756..49262)	hypothetical protein (complement(50481..50711))	hypothetical protein (complement(65125..66225))
NC_023177.1	hypothetical protein (7031..7852)	hypothetical protein (complement(17032..17802))	v-trex-a (31253..31621)	ie2 (32377..33177)	hypothetical protein (104565..104759)	hypothetical protein (complement(104710..104880))	hypothetical protein (complement(123216..123623))
MN075941.1	ORF5 (2728..2970)	ORF25 (complement(20267..20353))	ORF79 (62937..63407)	ORF82a (complement(64668..64925))	ORF99 (complement(81405..82589))	ORF136 (complement(118212..118433))
MZ290131.1	protein (complement(26764..27105))	hypothetical protein (complement(46167..46394))	protein (complement(54991..55116))	protein (complement(55119..55274))	protein (67046..67135)	protein (67233..67340)	protein (complement(87737..87922))	protein (89343..89489)	hypothetical protein (complement(101118..101657))	protein (complement(103490..103615))	hypothetical protein (complement(104678..105481))	protein (complement(135666..135770))	protein (complement(135996..136097))
KT626571.1	hypothetical protein (30955..31401)	hypothetical protein (complement(54216..54452))	hypothetical protein (complement(136361..136744))
NC_043520.1	hypothetical protein (complement(3271..3573))	hypothetical protein (4812..5456)	hypothetical protein (complement(11893..12063))	hypothetical protein (complement(50660..51235))	hypothetical protein (complement(54907..55065))	hypothetical protein (55080..55277)	hypothetical protein (55374..55547)	hypothetical protein (63886..64155)	hypothetical protein (77598..77987)	hypothetical protein (88846..89403)	hypothetical protein (complement(100228..100617))
MK503923.1	hypothetical protein (21953..22630)	hypothetical protein (46241..46672)	hypothetical protein (100222..100425)
MK033565.1	hypothetical protein (15787..16101)	hypothetical protein (49684..50457)	hypothetical protein (60017..60475)	hypothetical protein (complement(78731..79942))	hypothetical protein (complement(113605..113802))
NC_021924.1	hypothetical protein (6996..7250)	hypothetical protein (complement(7323..7511))	hypothetical protein (complement(16870..17637))	hypothetical protein (21076..21720)	hypothetical protein (30037..30249)	hypothetical protein (61481..61723)	hypothetical protein (69299..69544)	hypothetical protein (104226..104588)	hypothetical protein (complement(107640..107906))	hypothetical protein (complement(108726..108983))	hypothetical protein (complement(109053..109307))
KR815469.1	protein tyrosine phosphatase 1 (127489..128013)
KU738897.1	ORF45 (complement(39413..39640))	ORF85 (complement(75029..75526))	ORF101 (93910..94266)
JX560539.1	hypothetical protein (complement(41920..42153))	hypothetical protein (complement(73446..74048))
NC_018504.1	hypothetical protein (85883..86323)	AciNPV91 (complement(96293..96526))
MK507817.1	hypothetical protein (complement(39337..39576))	hypothetical protein (complement(73217..73699))	hypothetical protein (93149..93505)
NC_011354.1	hypothetical protein (complement(39700..39927))	baculovirus repeated ORF b (51832..52137)	hypothetical protein (complement(76434..76937))	hypothetical protein (95480..95836)	hypothetical protein (121338..121625)	hypothetical protein (121660..121917)
MN542939.1	hypothetical protein (complement(41507..41740))	hypothetical protein (61415..62116)
LC375539.1	hypothetical protein (16936..17679)	hypothetical protein (40089..40151)	truncated ecdysteroid UDP-glucosyltransferase (complement(119699..119743))
MK252969.1	maco-A 5 (5772..6356)	maco-A 10 (complement(11549..12508))	maco-A 18 (17155..17754)	maco-A 29 (26095..26445)	maco-A 30 (complement(26546..27193))	maco-A 43 (40785..41237)	maco-A 46 (complement(42362..42703))	maco-A 52 (complement(47575..47820))	maco-A 61 (complement(55294..55965))	maco-A 65 (complement(57442..58056))	maco-A 67 (58496..58981)	maco-A 69 (59576..60052)	maco-A 97 (88617..89123)	maco-A 120 (110724..111194)	maco-A 135 (122275..122502)	maco-A 142 (complement(130147..130605))	maco-A 146 (complement(134167..135234))
NC_007921.1	ORF-9 (complement(12174..13181))	ORF-14 (complement(15378..15530))	ORF-15 (15551..16012)	ORF-24 (24911..25705)	ORF-25 (25863..26606)	ORF-34 (complement(35102..35440))	ORF-42 (complement(43079..43348))	ORF-57 (53137..53643)	ORF-84 (82279..82902)	ORF-103 (103250..103651)	ORF-122 (complement(118506..118907))	ORF-127 (complement(123778..124794))	ORF-137 (132071..132316)
KU738903.1	ORF45 (complement(39407..39634))	ORF85 (complement(75023..75520))	ORF101 (93904..94260)	ORF128b (complement(117375..117515))
KJ701030.1	hypothetical protein (complement(39415..39642))	hypothetical protein (complement(75310..75807))	hypothetical protein (93908..94264)
JX560541.1	hypothetical protein (complement(41601..41834))	hypothetical protein (complement(73175..73777))
NC_030240.1	ORF_35 (complement(34800..35894))	ORF-78 (complement(81138..81503))	ORF-106 (102834..103019)
MH370144.1	se25 (complement(28403..28738))	se42 (42790..43212)	se59 (58632..59087)	se95 (97901..98104)
MN696169.1	ORF5 (2731..2973)	ORF66 (54036..54275)	ORF79 (62910..63380)	ORF82b (complement(64660..64917))	ORF99 (complement(81221..82405))	ORF136 (complement(118037..118258))
NC_009503.1	hypothetical protein (complement(14808..14981))	hypothetical protein (20468..21211)	hypothetical protein (complement(43299..43529))	hypothetical protein (complement(53500..53652))	hypothetical protein (complement(58937..59314))	hypothetical protein (complement(69881..70903))	hypothetical protein (92697..94076)	hypothetical protein (94116..96131)	hypothetical protein (complement(119434..119661))
NC_024688.1	ORF45 (complement(39449..39676))	ORF85 (complement(75023..75520))	ORF101 (93920..94276)
NC_029996.1	hypothetical protein (4280..4546)	hypothetical protein (23979..24182)	hypothetical protein (62002..62499)	hypothetical protein (complement(63797..64009))	hypothetical protein (complement(129365..129568))	hypothetical protein (complement(130806..130967))
MG746626.1	hypothetical protein (21143..21778)	hypothetical protein (complement(79989..80450))	protein tyrosine phosphatase 1 (126992..127516)
KR815463.1	E3 ubiquitin-protein ligase RNF12-like protein (111268..111678)	protein tyrosine phosphatase 1 (127599..128123)
EF207986.1	unknown (16995..17738)	P94-like protein (20842..22320)
MH077961.2	ac20 (11140..11370)	Ta75 (66729..66911)	he65-a (complement(83837..84013))
NC_033780.2	ORF6 (complement(4032..4391))	ORF8 (4587..4841)	ORF25 (19091..19345)	ORF27 (complement(21714..21968))	ORF30 (25216..26220)	ORF34 (28243..28557)	ORF55 (complement(47450..48100))	ORF56 (48090..48542)	ORF69 (63729..64154)	ORF79 (71369..71851)	ORF80 (71857..72342)	ORF83 (complement(73584..73805))	ORF142 (complement(137941..138126))	ORF145 (complement(139761..139964))
KR815457.1	protein tyrosine phosphatase 1 (126797..127321)
MK033567.1	hypothetical protein (15819..16133)	hypothetical protein (49780..50553)	hypothetical protein (60112..60570)	hypothetical protein (complement(78785..79996))	hypothetical protein (complement(113871..114068))
MK033574.1	hypothetical protein (15816..16130)	hypothetical protein (49696..50469)	hypothetical protein (60029..60487)	hypothetical protein (complement(78738..79949))	hypothetical protein (complement(113612..113809))
MK033572.1	hypothetical protein (15786..16100)	hypothetical protein (49635..50408)	hypothetical protein (59968..60426)	hypothetical protein (complement(78698..79909))	hypothetical protein (complement(113557..113754))
KU669292.1	hypothetical protein (complement(41299..41532))	hypothetical protein (61138..61884)
MK293724.1	nesp006 (complement(4995..5168))	nesp008 (6389..6529)	nesp039 (34448..34588)	nesp073 (64030..64212)	nesp083 (72009..72260)	nesp102 (complement(93106..93318))	nesp114 (complement(106090..106233))	ptp1 (125059..125580)
NC_026430.1	hypothetical protein (23289..23966)	baculovirus repeated namegeneORF (78001..78285)	protein tyrosine phosphatase 1 (121784..122341)
KR815462.1	protein tyrosine phosphatase 1 (127111..127635)
JN584482.1	hypothetical protein (complement(39745..39972))	hypothetical protein (complement(74792..75289))	hypothetical protein (94111..94467)
KR815467.1	protein tyrosine phosphatase 1 (126792..127316)
MN337871.1	maco-B 5 (5969..6556)	maco-B 9 (complement(11742..12701))	maco-B 24 (23685..23999)	maco-B 25 (complement(24129..24764))	maco-B 38 (38526..38966)	maco-B 41 (complement(40076..40417))	maco-B 64 (complement(54479..55093))	maco-B 68 (56638..57108)	maco-B 96 (85809..86324)	maco-B 119 (108338..108799)	maco-B 141 (complement(128747..129211))	maco-B 145 (complement(132747..133796))
MN542938.1	hypothetical protein (complement(41689..41922))	hypothetical protein (61597..62298)
NC_002816.1	ORF5 similar to XcGV ORF8 (2729..2971)	ORF38 similar to XcGV ORF33 (complement(33050..33391))	ORF79 similar to AcMNPV ORF150 (62816..63286)	ORF99 similar to XcGV ORF113 (complement(81302..82486))	ORF136 similar to XcGV ORF173 (complement(118119..118340))
KJ701029.1	hypothetical protein (complement(39558..39785))	hypothetical protein (complement(75882..76379))	hypothetical protein (94946..95302)
NC_039213.1	hypothetical protein (6647..6910)	hypothetical protein (45042..47564)	hypothetical protein (complement(69411..69713))	hypothetical protein (complement(85104..86249))	hypothetical protein (complement(110168..110578))	hypothetical protein (complement(118789..118992))
NC_013772.1	hypothetical protein (25152..25628)	hypothetical protein (39702..43343)	hypothetical protein (complement(52710..52922))	hypothetical protein (complement(54541..56619))	hypothetical protein (complement(56674..58119))	hypothetical protein (complement(58220..58879))	hypothetical protein (84175..84669)	hypothetical protein (complement(85972..86184))	hypothetical protein (103455..103679)	hypothetical protein (164387..164587)	hypothetical protein (complement(171705..171908))
NC_028491.1	hypothetical protein (9096..9299)	hypothetical protein (complement(12879..13103))	hypothetical protein (13528..14025)	hypothetical protein (19145..19630)	hypothetical protein (complement(19587..19829))	hypothetical protein (19804..19989)	hypothetical protein (complement(24210..25142))	hypothetical protein (25067..25219)	hypothetical protein (26098..27294)	hypothetical protein (complement(42455..42631))	hypothetical protein (47630..47782)	hypothetical protein (47800..48003)	hypothetical protein (complement(49103..49321))	hypothetical protein (complement(51395..52171))	hypothetical protein (55805..56179)	hypothetical protein (complement(65465..66499))	hypothetical protein (complement(75661..75849))	hypothetical protein (complement(80193..80444))	hypothetical protein (complement(80555..82066))	hypothetical protein (complement(83745..83942))	hypothetical protein (complement(89808..89960))	hypothetical protein (complement(95942..96139))
MT810812.1	hypothetical protein (complement(22707..22826))	hypothetical protein (complement(39764..39991))	hypothetical protein (complement(75568..76011))	hypothetical protein (complement(80059..80241))	hypothetical protein (92816..92938)	hypothetical protein (94597..94953)	hypothetical protein (complement(120405..120524))	hypothetical protein (complement(120784..120942))
LC375541.1	hypothetical protein (17462..18205)
KJ676450.1	orf14 (13638..13889)	orf25 (complement(26224..26802))	orf40 (complement(41473..41709))	orf75 (complement(78301..78726))	p6.9 (86739..86999)	orf99 (complement(102055..102522))	orf112 (complement(112189..112524))
KM226332.1	ADOR5 (2434..2685)	ADOR66 (47972..48427)	ADOR83 (complement(64356..65423))	ADOR115 (complement(94761..94958))
KU669290.1	hypothetical protein (complement(41213..41446))	hypothetical protein (61045..61743)	P6.9 (complement(86942..87286))
KR815455.1	protein tyrosine phosphatase 1 (126987..127511)
HG425344.1	Unknown (Maco41) (complement(33414..33752))	Unknown (Maco68) (47962..48390)	Unknown (Ac145) (64234..64704)	Unknown (Se84) (81890..82525)	Unknown (Maco134) (101879..102082)
JX404026.1	hypothetical protein (17461..17958)	PhcyNPV031 (complement(30622..31026))	hypothetical protein (complement(39548..39754))	38.7k N-terminal (119012..119461)	ptp 1 (121724..122260)
MN099285.1	ORF80 protein (complement(65174..66196))	ORF112 protein (complement(95955..96284))
KM386655.1	hypothetical protein (30963..31235)	hypothetical protein (complement(138074..138466))
NC_008348.1	ORF4 (complement(3482..4090))	ORF7 (9119..10447)	ORF9 (complement(11581..11751))	ORF10 (complement(11721..11903))	ORF19 (complement(21269..21490))	ORF28 (30701..31003)	ORF29 (30970..31227)	ORF33 (33555..33743)	ORF39 (37807..38127)	ORF46 (45356..45610)	ORF51 (complement(47475..47645))	ORF56 (51028..51216)	ORF70 (62827..63492)	ORF72 (63901..64365)	ORF73 (64644..65081)	ORF79 (72231..72392)	ORF107 (107390..107818)	ORF115 (116083..116271)	ORF118 (117551..117763)	ORF122 (complement(121178..121558))	ORF125 (complement(124190..124708))	ORF132 (129299..129466)	ORF140 (135853..136095)	ORF144 (complement(141121..141510))	ORF157 (complement(154662..155036))
MT561366.1	hypothetical protein (37044..37265)	hypothetical protein (complement(87157..87654))	hypothetical protein (complement(90944..91117))	hypothetical protein (96795..97121)	hypothetical protein (106084..106296)	hypothetical protein (112570..112728)
KT013224.1	ORF86 (complement(58585..59028))	ORF101 (77445..77801)
LC516821.1	hypothetical protein (complement(6303..6557))	hypothetical protein (complement(16327..17097))	hypothetical protein (20601..21209)	inhibitor of apoptosis protein 4 (41225..41638)	hypothetical protein (48267..48434)	hypothetical protein (complement(82482..82658))	hypothetical protein (complement(115244..115492))
NC_007383.1	immediate early 1 (ie1) (14983..17184)	orf40 (complement(37086..37319))	hypothetical protein (57167..57832)	hypothetical protein (complement(110877..111083))
MK419956.1	hypothetical protein (complement(4903..5163))	hypothetical protein (5684..6886)	hypothetical protein (9415..9798)	hypothetical protein (complement(20327..20488))	hypothetical protein (complement(29210..29362))	hypothetical protein (complement(38856..39083))	hypothetical protein (complement(62940..63458))	hypothetical protein (complement(108051..108629))	hypothetical protein (complement(115738..115902))	hypothetical protein (119728..120147)
MZ766431.1	hypothetical protein (16987..17361)	hypothetical protein (26089..26469)	hypothetical protein (complement(47550..47786))	hypothetical protein (60415..61383)	hypothetical protein (complement(125405..125779))	hypothetical protein (complement(126553..126927))
MZ292981.1	hypothetical protein (21923..22540)	hypothetical protein (46206..46637)	hypothetical protein (62546..63001)	hypothetical protein (100166..100369)
MN661137.1	hypothetical protein (complement(2905..3165))	hypothetical protein (complement(8642..9052))	hypothetical protein (complement(8661..9038))	hypothetical protein (30742..31014)	hypothetical protein (30935..31189)	conotoxin-like protein 2 (complement(62174..62278))	hypothetical protein (complement(135376..135762))
KU529793.1	PxGV-Morf80 protein (complement(65178..66200))	PxGV-Morf112 protein (complement(95969..96298))
KR815464.1	protein tyrosine phosphatase 1 (127489..128013)
NC_015398.1	orf1629 (complement(744..1157))	hypothetical protein (2541..2807)	hypothetical protein (24104..25033)	hypothetical protein (50053..50526)	hypothetical protein (complement(67101..68192))	hypothetical protein (complement(81902..82051))	hypothetical protein (complement(94403..94612))	hypothetical protein (complement(94909..95097))	hypothetical protein (complement(96431..96640))
KU377538.1	hypothetical protein (7809..9476)	hypothetical protein (complement(9756..10415))	baculovirus repeated ORF b (24907..25107)	hypothetical protein (26212..26421)	hypothetical protein (26668..26982)	hypothetical protein (complement(49927..50166))	hypothetical protein (complement(51719..51910))	hypothetical protein (complement(70329..70514))	hypothetical protein (131043..131363)	hypothetical protein (complement(140453..141004))	hypothetical protein (complement(141079..141501))	hypothetical protein (complement(142297..142695))	hypothetical protein (complement(157115..157267))
KT626570.1	hypothetical protein (30510..30776)	hypothetical protein (complement(141071..141454))	SOD (142651..143277)
KT626572.1	hypothetical protein (30674..31114)	hypothetical protein (complement(138340..138729))	hypothetical protein (complement(139493..139834))
MK409385.1	Maco-A 5 (5713..6321)	Maco-A 10 (complement(11512..12471))	Maco-A 18 (17189..17788)	Maco-A 29 (26103..26423)	Maco-A 30 (complement(26533..27177))	Maco-A 43 (40715..41167)	Maco-A 46 (complement(42295..42636))	Maco-A 61 (complement(55114..55791))	Maco-A 65 (complement(57271..57885))	Maco-A 67 (58325..58810)	Maco-A 69 (59405..59881)	Maco-A 97 (88301..88807)	Maco-A 105 (complement(96685..96828))	Maco-A 120 (110746..111216)	Maco-A 135 (122290..122517)	Maco-A 142 (complement(130126..130584))	Maco-A 146 (complement(134146..135195))
MW162628.1	Sf23 (21888..22553)	Sf50 (46178..46609)	Sf107 (100170..100373)
NC_005137.2	protein tyrosine phosphatase 1 (complement(4155..4676))	hypothetical protein (complement(109313..109960))
MK033575.1	hypothetical protein (complement(13408..13881))	hypothetical protein (15808..16122)	hypothetical protein (49688..50461)	hypothetical protein (60021..60479)	hypothetical protein (complement(78734..79945))	hypothetical protein (complement(113590..113787))
KU669289.1	hypothetical protein (7182..7490)	hypothetical protein (complement(41315..41545))	hypothetical protein (61153..61875)
NC_032255.1	ORF12 (complement(8421..10262))	ORF22 (19988..20560)	ORF24 (complement(20934..21959))	ORF28 (27464..29122)	ORF36 (complement(34788..35198))	ORF53 (49474..50136)	ORF85 (complement(76290..77351))	ORF103 (93414..93659)	ORF115 (complement(106620..107153))	ORF116 (complement(107167..107337))	ORF119 (complement(108599..108805))
HG425345.1	Unknown (Maco41) (complement(41130..41468))	Unknown (Maco68) (55680..56108)	Unknown (Ac145) (71953..72423)	Unknown (Se84) (89632..90267)	Unknown (Maco134) (109618..109821)
NC_007151.1	ORF-43 peptide (complement(41626..41859))	ORF-75 peptide (complement(73168..73770))
KM609482.1	AcOrf-70 peptide (55594..56466)	AcOrf-84 peptide (66649..67215)
MT782112.1	hypothetical protein (30861..31307)	hypothetical protein (complement(53904..54140))	hypothetical protein (complement(136926..137309))
MK411291.1	hypothetical protein (30486..30758)	hypothetical protein (complement(136888..137274))
MN689114.1	hypothetical protein (complement(41194..41427))	hypothetical protein (60775..61476)
NC_004778.3	protein tyrosine phosphatase 1 (complement(4198..4731))	hypothetical protein (complement(108952..109560))	hypothetical protein (124982..125284)
KX859081.1	hypothetical protein (complement(744..1082))	hypothetical protein (4405..4644)	hypothetical protein (20370..21299)	hypothetical protein (48787..49293)	hypothetical protein (complement(50512..50742))	hypothetical protein (complement(65162..66262))
NC_025960.1	asb010 (complement(12740..13699))	asb015 (complement(15870..16043))	asb034 (complement(35409..35741))	asb054 (53046..53621)	asb080 (80984..81577)	asb108 (complement(110621..110779))	asb113 (112612..112821)	asb120 (complement(120482..120889))	asb124 (complement(124765..125772))	asb134 (complement(132949..133119))
MK558262.1	hypothetical protein (4018..4236)	hypothetical protein (8087..8239)	hypothetical protein (complement(12392..12598))	hypothetical protein (16150..16377)	hypothetical protein (16490..16672)	hypothetical protein (16820..16978)	hypothetical protein (17899..18057)	P26 (22818..23516)	hypothetical protein (complement(28197..28352))	hypothetical protein (complement(32630..32803))	hypothetical protein (complement(32830..33111))	hypothetical protein (34378..34611)	hypothetical protein (36594..36872)	hypothetical protein (complement(39971..40291))	hypothetical protein (complement(56063..56365))	hypothetical protein (79436..79609)	hypothetical protein (complement(99497..100429))	hypothetical protein (100862..101023)	hypothetical protein (complement(117812..118117))
KR815468.1	protein tyrosine phosphatase 1 (126750..127274)
NC_011423.1	hypothetical protein (14717..14983)	hypothetical protein (35510..35740)	hypothetical protein (complement(77667..77834))	hypothetical protein (97597..99327)	hypothetical protein (complement(99409..99816))
HG425343.1	Unknown (Maco41) (complement(33989..34327))	Unknown (Maco68) (48541..48969)	Unknown (Ac145) (64926..65396)	Unknown (Se84) (82581..83216)	Unknown (Maco134) (102566..102769)
NC_013953.1	ORF26 (28260..28691)	ORF46 (44298..44450)	ORF111 (107995..108324)	ORF113 (109100..109465)	ORF130 (complement(125790..126041))	gag-like protein (complement(126071..128140))
MN099284.1	ORF80 protein (complement(65158..66180))	ORF112 protein (complement(95924..96253))
HG425347.2	Unknown (Maco41) (complement(34030..34368))	Unknown (Maco68) (48577..49005)	Unknown (Ac145) (64837..65307)	Unknown (Se84) (82476..83111)	Unknown (Maco134) (102460..102663)
KU738902.1	ORF45 (complement(39410..39637))	ORF85 (complement(75026..75523))	ORF101 (93907..94263)
NC_026511.1	ORF006 (4073..4327)	ORF024 (19351..20169)	chit-2b (66129..66608)	ORF098 (complement(90877..91473))	ORF099 (complement(91654..92250))	chit-2c (132905..133393)	ORF138 (complement(135498..135701))
NC_005068.1	hypothetical protein (2629..2889)	hypothetical protein (complement(12700..12945))	hypothetical protein (15016..15204)	hypothetical protein (41315..43060)	hypothetical protein (57798..58262)	hypothetical protein (complement(75345..76457))	hypothetical protein (complement(106003..106350))
KR815460.1	protein tyrosine phosphatase 1 (127435..127959)
KY979487.1	hypothetical protein (910..1653)	P94-like protein (4757..6247)	baculovirus repeated ORF (complement(21229..21924))	protein tyrosine phosphatase 1 (106978..107514)
JF899325.1	hypothetical protein (21915..22373)	hypothetical protein (41323..41754)	hypothetical protein (57999..58454)	hypothetical protein (95710..95913)
MH577296.1	hypothetical protein (complement(37038..37271))	hypothetical protein (43253..43447)	hypothetical protein (57108..57773)
MN689112.1	hypothetical protein (complement(41273..41506))	hypothetical protein (61159..61860)
KC994902.1	hypothetical protein (6648..6911)	hypothetical protein (complement(6947..7126))	hypothetical protein (complement(84987..86132))	hypothetical protein (complement(110051..110461))	hypothetical protein (complement(118672..118875))
MT782113.1	hypothetical protein (30918..31364)	hypothetical protein (complement(53961..54197))	hypothetical protein (complement(136962..137345))
KU738898.1	ORF45 (complement(39413..39640))	ORF85 (complement(75028..75525))	ORF101 (93909..94265)
NC_009011.2	hypothetical protein (21931..22548)	hypothetical protein (44796..45227)	hypothetical protein (61155..61610)	hypothetical protein (98779..98982)
KR815465.1	protein tyrosine phosphatase 1 (127272..127796)
KU738899.1	ORF45 (complement(39407..39634))	ORF85 (complement(75022..75519))	ORF101 (93903..94259)
MN696171.1	ORF5 (2729..2971)	ORF79 (63072..63542)	ORF82b (complement(64822..65079))	ORF99 (complement(81559..82743))	ORF136 (complement(118378..118599))
NC_003084.1	CUN002 hypothetical protein	ATP_GTP_A motif (2159..2830)	CUN003 hypothetical protein (complement(3139..3366))	CUN007 hypothetical protein (complement(7351..7986))	CUN006 hypothetical protein (complement(7359..7664))	CUN009 hypothetical protein (complement(8811..9053))	CUN010 hypothetical protein (9054..9260)	CUN011 hypothetical protein (9261..10901)	CUN012 hypothetical protein (10919..11632)	CUN016 hypothetical protein (13891..14280)	CUN017 hypothetical protein (complement(14344..14829))	CUN019 hypothetical protein (15940..16206)	CUN020 hypothetical protein (16203..17000)	CUN021 hypothetical protein (17019..17324)	CUN027 hypothetical protein (complement(23490..23918))	CUN036 hypothetical protein (32145..32783)	CUN037 hypothetical protein (32501..32932)	CUN039 hypothetical protein (34250..34966)	CUN040 hypothetical protein (complement(35204..35503))	CUN042 hypothetical protein (complement(35544..36062))	CUN041 hypothetical protein (36007..36582)	CUN043 hypothetical protein (complement(36653..36937))	CUN044 hypothetical protein (37270..37794)	CUN047 hypothetical protein (39510..39755)	CUN048 hypothetical protein (39764..40117)	CUN050 hypothetical protein (complement(40535..40861))	CUN051 hypothetical protein (41329..41589)	CUN053 hypothetical protein (42768..43586)	CUN056 hypothetical protein (complement(43190..43726))	CUN057 hypothetical protein (complement(44823..46055))	CUN060 hypothetical protein (48054..48446)	CUN061 hypothetical protein (complement(48474..48917))	CUN062 hypothetical protein (complement(50219..50968))	CUN063 hypothetical protein (complement(51662..52057))	CUN064 hypothetical protein (complement(52342..52686))	CUN065 hypothetical protein (53089..54123)	CUN066 hypothetical protein (complement(54536..55021))	CUN068 hypothetical protein (59508..60236)	CUN071 hypothetical protein (62028..62393)	CUN072 hypothetical protein (complement(62418..63185))	CUN075 putative p35 apoptosis inhibitor	similar to AcMNPV ORF135 (complement(66855..67409))	CUN076 hypothetical protein (67480..67812)	CUN077 hypothetical protein (67883..68095)	CUN078 hypothetical protein (complement(68170..68478))	CUN079 hypothetical protein (complement(69307..69621))	CUN080 hypothetical protein (complement(69621..70706))	CUN081 hypothetical protein (complement(70817..71035))	CUN082 hypothetical protein (complement(71028..72206))
NC_055467.1	cyun4 (complement(4860..5081))	cyun5 (complement(5159..5374))	cyun50 (complement(47752..48117))	cyun101 (complement(99633..99845))
NC_055453.1	hypothetical protein (6552..7409)	hypothetical protein (24508..24663)	hypothetical protein (complement(29342..29494))	hypothetical protein (43160..43381)	hypothetical protein (complement(46146..46487))	hypothetical protein (complement(84447..84620))	hypothetical protein (complement(100640..101074))	hypothetical protein (complement(105621..105800))	hypothetical protein (111887..112216)	hypothetical protein (113639..114031)	hypothetical protein (complement(116147..116380))	hypothetical protein (130993..131148)
NC_038369.1	hypothetical protein (complement(46538..46765))	hypothetical protein (complement(103593..104126))	hypothetical protein (complement(107481..108530))	hypothetical protein (complement(111873..112064))
[truncated: 12 more columns]
